# Supplementary material for: Gypenosides Prevent and Dissolve Cholesterol Gallstones by Modulating the Homeostasis of Cholesterol and Bile Acids
Source: Front Med (Lausanne). 2022 Apr 4;9:818144. doi: 10.3389/fmed.2022.818144 (PMC9013900; doi:10.3389/fmed.2022.818144)
Supplement: Supplementary Table 4 — Gene Ontology (GO) pathway enrichment analyses of genes differentially expressed in the LD and GPs groups. [file Table_4.xls]

## Sheet: BP
	ID	Description	GeneRatio	BgRatio	pvalue	p.adjust	qvalue	geneID	Count	category
GO:0035634	GO:0035634	response to stilbenoid	6/168	22/23210	8.9128e-09	1.77989e-05	1.7075e-05	Hsd3b5/Idi1/Mup1/Mup3/Slc22a7/Slco1a1	6	BP
GO:0008202	GO:0008202	steroid metabolic process	12/168	301/23210	2.12198e-06	0.0021188	0.00203263	Afp/Apoc3/Cyp3a16/Cyp51/Cyp7b1/Hsd3b5/Msmo1/Nsdhl/Serpina12/Sqle/Sult1b1/Tm7sf2	12	BP
GO:0016125	GO:0016125	sterol metabolic process	8/168	135/23210	6.4751e-06	0.00431026	0.00413498	Apoc3/Cyp51/Cyp7b1/Msmo1/Nsdhl/Serpina12/Sqle/Tm7sf2	8	BP
GO:0016126	GO:0016126	sterol biosynthetic process	5/168	52/23210	3.69497e-05	0.0150381	0.0144265	Cyp51/Msmo1/Nsdhl/Sqle/Tm7sf2	5	BP
GO:0008203	GO:0008203	cholesterol metabolic process	7/168	126/23210	3.76516e-05	0.0150381	0.0144265	Apoc3/Cyp51/Cyp7b1/Nsdhl/Serpina12/Sqle/Tm7sf2	7	BP
GO:1902652	GO:1902652	secondary alcohol metabolic process	7/168	138/23210	6.72013e-05	0.0223668	0.0214573	Apoc3/Cyp51/Cyp7b1/Nsdhl/Serpina12/Sqle/Tm7sf2	7	BP
GO:0006694	GO:0006694	steroid biosynthetic process	7/168	156/23210	0.00014481	0.0413122	0.0396321	Cyp51/Cyp7b1/Hsd3b5/Msmo1/Nsdhl/Sqle/Tm7sf2	7	BP
GO:1901615	GO:1901615	organic hydroxy compound metabolic process	12/168	488/23210	0.000238499	0.0595354	0.0571143	Adh4/Apoc3/Cyp51/Cyp7b1/Dct/Msmo1/Nsdhl/Serpina12/Sqle/Sult1b1/Tm7sf2/Dio3	12	BP
GO:0045721	GO:0045721	negative regulation of gluconeogenesis	3/168	18/23210	0.00028061	0.0622643	0.0597322	Mup1/Serpina12/Gck	3	BP
GO:0006066	GO:0006066	alcohol metabolic process	9/168	321/23210	0.000572945	0.114417	0.109764	Adh4/Apoc3/Cyp51/Cyp7b1/Nsdhl/Serpina12/Sqle/Sult1b1/Tm7sf2	9	BP
GO:0070665	GO:0070665	positive regulation of leukocyte proliferation	6/168	145/23210	0.000667283	0.121142	0.116216	Ocstamp/Cd6/Itgal/Prkcq/Ptpn22/Rasal3	6	BP
GO:0042102	GO:0042102	positive regulation of T cell proliferation	5/168	98/23210	0.000738937	0.122972	0.117971	Cd6/Itgal/Prkcq/Ptpn22/Rasal3	5	BP
GO:0045761	GO:0045761	regulation of adenylate cyclase activity	3/168	26/23210	0.000856886	0.131631	0.126278	Cacna1c/Adrb1/P2ry13	3	BP
GO:1901617	GO:1901617	organic hydroxy compound biosynthetic process	7/168	226/23210	0.00132891	0.18956	0.181851	Cyp51/Cyp7b1/Dct/Msmo1/Nsdhl/Sqle/Tm7sf2	7	BP
GO:0007586	GO:0007586	digestion	5/168	122/23210	0.00196323	0.250287	0.240109	Capn8/Chrm3/Cyp7b1/Tff3/Adrb1	5	BP
GO:0031279	GO:0031279	regulation of cyclase activity	3/168	35/23210	0.00205659	0.250287	0.240109	Cacna1c/Adrb1/P2ry13	3	BP
GO:0001702	GO:0001702	gastrulation with mouth forming second	3/168	36/23210	0.00223171	0.250287	0.240109	Nat8/Nat8f5/Nodal	3	BP
GO:0045762	GO:0045762	positive regulation of adenylate cyclase activity	2/168	10/23210	0.00225597	0.250287	0.240109	Cacna1c/Adrb1	2	BP
GO:0051339	GO:0051339	regulation of lyase activity	3/168	38/23210	0.00260906	0.274226	0.263074	Cacna1c/Adrb1/P2ry13	3	BP
GO:0050708	GO:0050708	regulation of protein secretion	10/168	490/23210	0.00311131	0.278554	0.267227	Cyp51/Mup1/Adrb1/Baiap3/Bank1/Gck/Inhbb/Nlgn2/Prkcq/Ptpn22	10	BP
GO:0050671	GO:0050671	positive regulation of lymphocyte proliferation	5/168	136/23210	0.00314463	0.278554	0.267227	Cd6/Itgal/Prkcq/Ptpn22/Rasal3	5	BP
GO:0071294	GO:0071294	cellular response to zinc ion	2/168	12/23210	0.00327742	0.278554	0.267227	Mt1/Mt2	2	BP
GO:1900165	GO:1900165	negative regulation of interleukin-6 secretion	2/168	12/23210	0.00327742	0.278554	0.267227	Bank1/Ptpn22	2	BP
GO:0032946	GO:0032946	positive regulation of mononuclear cell proliferation	5/168	138/23210	0.00334767	0.278554	0.267227	Cd6/Itgal/Prkcq/Ptpn22/Rasal3	5	BP
GO:0006111	GO:0006111	regulation of gluconeogenesis	3/168	43/23210	0.00371733	0.285124	0.273529	Mup1/Serpina12/Gck	3	BP
GO:0032924	GO:0032924	activin receptor signaling pathway	3/168	43/23210	0.00371733	0.285124	0.273529	Fst/Nodal/Inhbb	3	BP
GO:0071280	GO:0071280	cellular response to copper ion	2/168	13/23210	0.00385495	0.285124	0.273529	Mt1/Mt2	2	BP
GO:0090207	GO:0090207	regulation of triglyceride metabolic process	3/168	45/23210	0.00422943	0.289933	0.278143	Apoc3/Serpina12/Thrsp	3	BP
GO:0062014	GO:0062014	negative regulation of small molecule metabolic process	4/168	91/23210	0.00434206	0.289933	0.278143	Acmsd/Mup1/Serpina12/Gck	4	BP
GO:0006695	GO:0006695	cholesterol biosynthetic process	3/168	46/23210	0.00450071	0.289933	0.278143	Cyp51/Nsdhl/Tm7sf2	3	BP
GO:0010677	GO:0010677	negative regulation of cellular carbohydrate metabolic process	3/168	46/23210	0.00450071	0.289933	0.278143	Mup1/Serpina12/Gck	3	BP
GO:1902653	GO:1902653	secondary alcohol biosynthetic process	3/168	47/23210	0.00478231	0.293292	0.281364	Cyp51/Nsdhl/Tm7sf2	3	BP
GO:0050709	GO:0050709	negative regulation of protein secretion	5/168	152/23210	0.00504161	0.293292	0.281364	Cyp51/Mup1/Bank1/Inhbb/Ptpn22	5	BP
GO:1903115	GO:1903115	regulation of actin filament-based movement	3/168	48/23210	0.00507433	0.293292	0.281364	Cacna1c/Tnnc1/Adrb1	3	BP
GO:0046541	GO:0046541	saliva secretion	2/168	15/23210	0.00514031	0.293292	0.281364	Chrm3/Adrb1	2	BP
GO:0032715	GO:0032715	negative regulation of interleukin-6 production	3/168	50/23210	0.00569004	0.300246	0.288036	Bank1/Irak3/Ptpn22	3	BP
GO:0030073	GO:0030073	insulin secretion	6/168	223/23210	0.00578632	0.300246	0.288036	Cacna1c/Mup1/Baiap3/Gck/Inhbb/Nlgn2	6	BP
GO:0044320	GO:0044320	cellular response to leptin stimulus	2/168	16/23210	0.00584684	0.300246	0.288036	Gck/Inhbb	2	BP
GO:0045912	GO:0045912	negative regulation of carbohydrate metabolic process	3/168	51/23210	0.00601394	0.300246	0.288036	Mup1/Serpina12/Gck	3	BP
GO:0098754	GO:0098754	detoxification	3/168	51/23210	0.00601394	0.300246	0.288036	Adh4/Mt1/Mt2	3	BP
GO:0046148	GO:0046148	pigment biosynthetic process	3/168	52/23210	0.00634865	0.307221	0.294727	Alas1/Atpif1/Dct	3	BP
GO:0002792	GO:0002792	negative regulation of peptide secretion	5/168	162/23210	0.00657366	0.307221	0.294727	Cyp51/Mup1/Bank1/Inhbb/Ptpn22	5	BP
GO:1903531	GO:1903531	negative regulation of secretion by cell	6/168	234/23210	0.00726567	0.307221	0.294727	Cyp51/Mup1/Bank1/Gck/Inhbb/Ptpn22	6	BP
GO:0031281	GO:0031281	positive regulation of cyclase activity	2/168	18/23210	0.00738438	0.307221	0.294727	Cacna1c/Adrb1	2	BP
GO:0033574	GO:0033574	response to testosterone	2/168	18/23210	0.00738438	0.307221	0.294727	Mup1/Mup11	2	BP
GO:0034389	GO:0034389	lipid droplet organization	2/168	18/23210	0.00738438	0.307221	0.294727	Fitm1/Sqle	2	BP
GO:0044321	GO:0044321	response to leptin	2/168	18/23210	0.00738438	0.307221	0.294727	Gck/Inhbb	2	BP
GO:0097091	GO:0097091	synaptic vesicle clustering	2/168	18/23210	0.00738438	0.307221	0.294727	Nlgn2/Syn1	2	BP
GO:0070663	GO:0070663	regulation of leukocyte proliferation	6/168	238/23210	0.00786593	0.320086	0.307069	Ocstamp/Cd6/Itgal/Prkcq/Ptpn22/Rasal3	6	BP
GO:0042129	GO:0042129	regulation of T cell proliferation	5/168	170/23210	0.00801417	0.320086	0.307069	Cd6/Itgal/Prkcq/Ptpn22/Rasal3	5	BP
GO:0051349	GO:0051349	positive regulation of lyase activity	2/168	19/23210	0.00821413	0.32164	0.30856	Cacna1c/Adrb1	2	BP
GO:0022409	GO:0022409	positive regulation of cell-cell adhesion	6/168	242/23210	0.00850116	0.323624	0.310463	Nodal/Cd6/Itgal/Prkcq/Ptpn22/Rasal3	6	BP
GO:1901616	GO:1901616	organic hydroxy compound catabolic process	3/168	58/23210	0.00858891	0.323624	0.310463	Adh4/Sult1b1/Dio3	3	BP
GO:0034368	GO:0034368	protein-lipid complex remodeling	2/168	20/23210	0.00908372	0.329064	0.315682	Apom/Pla2g7	2	BP
GO:0034369	GO:0034369	plasma lipoprotein particle remodeling	2/168	20/23210	0.00908372	0.329064	0.315682	Apom/Pla2g7	2	BP
GO:0010906	GO:0010906	regulation of glucose metabolic process	4/168	115/23210	0.00983135	0.329064	0.315682	Mup1/Serpina12/Tff3/Gck	4	BP
GO:0097006	GO:0097006	regulation of plasma lipoprotein particle levels	3/168	61/23210	0.00986156	0.329064	0.315682	Apoc3/Apom/Pla2g7	3	BP
GO:0006783	GO:0006783	heme biosynthetic process	2/168	21/23210	0.00999252	0.329064	0.315682	Alas1/Atpif1	2	BP
GO:0010866	GO:0010866	regulation of triglyceride biosynthetic process	2/168	21/23210	0.00999252	0.329064	0.315682	Apoc3/Thrsp	2	BP
GO:0034367	GO:0034367	protein-containing complex remodeling	2/168	21/23210	0.00999252	0.329064	0.315682	Apom/Pla2g7	2	BP
GO:0045785	GO:0045785	positive regulation of cell adhesion	8/168	411/23210	0.0103439	0.329064	0.315682	Nodal/S100a10/Apbb1ip/Cd6/Itgal/Prkcq/Ptpn22/Rasal3	8	BP
GO:0002793	GO:0002793	positive regulation of peptide secretion	7/168	331/23210	0.0105839	0.329064	0.315682	S100a8/Adrb1/Baiap3/Gck/Nlgn2/Prkcq/Ptpn22	7	BP
GO:0031649	GO:0031649	heat generation	2/168	22/23210	0.0109399	0.329064	0.315682	Mup1/Adrb1	2	BP
GO:0046641	GO:0046641	positive regulation of alpha-beta T cell proliferation	2/168	22/23210	0.0109399	0.329064	0.315682	Ptpn22/Rasal3	2	BP
GO:0060080	GO:0060080	inhibitory postsynaptic potential	2/168	22/23210	0.0109399	0.329064	0.315682	Adrb1/Nlgn2	2	BP
GO:0050796	GO:0050796	regulation of insulin secretion	5/168	185/23210	0.0112808	0.329064	0.315682	Mup1/Baiap3/Gck/Inhbb/Nlgn2	5	BP
GO:0006094	GO:0006094	gluconeogenesis	3/168	65/23210	0.0117205	0.329064	0.315682	Mup1/Serpina12/Gck	3	BP
GO:0042440	GO:0042440	pigment metabolic process	3/168	65/23210	0.0117205	0.329064	0.315682	Alas1/Atpif1/Dct	3	BP
GO:0050870	GO:0050870	positive regulation of T cell activation	5/168	187/23210	0.0117757	0.329064	0.315682	Cd6/Itgal/Prkcq/Ptpn22/Rasal3	5	BP
GO:0046688	GO:0046688	response to copper ion	2/168	23/23210	0.0119253	0.329064	0.315682	Mt1/Mt2	2	BP
GO:0071276	GO:0071276	cellular response to cadmium ion	2/168	23/23210	0.0119253	0.329064	0.315682	Mt1/Mt2	2	BP
GO:0006006	GO:0006006	glucose metabolic process	5/168	188/23210	0.0120286	0.329064	0.315682	Mup1/Onecut1/Serpina12/Tff3/Gck	5	BP
GO:0051048	GO:0051048	negative regulation of secretion	6/168	261/23210	0.0120289	0.329064	0.315682	Cyp51/Mup1/Bank1/Gck/Inhbb/Ptpn22	6	BP
GO:0006882	GO:0006882	cellular zinc ion homeostasis	2/168	24/23210	0.0129482	0.342966	0.329019	Mt1/Mt2	2	BP
GO:0030728	GO:0030728	ovulation	2/168	24/23210	0.0129482	0.342966	0.329019	Afp/Inhbb	2	BP
GO:0002440	GO:0002440	production of molecular mediator of immune response	7/168	345/23210	0.0130523	0.342966	0.329019	Igkv1-117/Igkv3-12/Igkv3-2/Igkv4-57/Igkv9-120/Irak3/Ptpn22	7	BP
GO:0019319	GO:0019319	hexose biosynthetic process	3/168	68/23210	0.013238	0.343328	0.329366	Mup1/Serpina12/Gck	3	BP
GO:0046635	GO:0046635	positive regulation of alpha-beta T cell activation	3/168	69/23210	0.0137675	0.349671	0.335451	Prkcq/Ptpn22/Rasal3	3	BP
GO:0042403	GO:0042403	thyroid hormone metabolic process	2/168	25/23210	0.0140078	0.349671	0.335451	Sult1b1/Dio3	2	BP
GO:0055069	GO:0055069	zinc ion homeostasis	2/168	25/23210	0.0140078	0.349671	0.335451	Mt1/Mt2	2	BP
GO:0019915	GO:0019915	lipid storage	3/168	70/23210	0.014309	0.352778	0.338432	Fitm1/Mup1/Sqle	3	BP
GO:0006779	GO:0006779	porphyrin-containing compound biosynthetic process	2/168	26/23210	0.0151037	0.3634	0.348622	Alas1/Atpif1	2	BP
GO:0007263	GO:0007263	nitric oxide mediated signal transduction	2/168	26/23210	0.0151037	0.3634	0.348622	Mt1/Mt2	2	BP
GO:0030072	GO:0030072	peptide hormone secretion	6/168	278/23210	0.0159656	0.368217	0.353243	Cacna1c/Mup1/Baiap3/Gck/Inhbb/Nlgn2	6	BP
GO:0044262	GO:0044262	cellular carbohydrate metabolic process	6/168	279/23210	0.0162219	0.368217	0.353243	Mup1/Serpina12/Tff3/Treh/Adrb1/Gck	6	BP
GO:0032925	GO:0032925	regulation of activin receptor signaling pathway	2/168	27/23210	0.0162353	0.368217	0.353243	Fst/Nodal	2	BP
GO:0033014	GO:0033014	tetrapyrrole biosynthetic process	2/168	27/23210	0.0162353	0.368217	0.353243	Alas1/Atpif1	2	BP
GO:1903039	GO:1903039	positive regulation of leukocyte cell-cell adhesion	5/168	203/23210	0.0162749	0.368217	0.353243	Cd6/Itgal/Prkcq/Ptpn22/Rasal3	5	BP
GO:0051224	GO:0051224	negative regulation of protein transport	5/168	204/23210	0.0165892	0.368217	0.353243	Cyp51/Mup1/Bank1/Inhbb/Ptpn22	5	BP
GO:0046364	GO:0046364	monosaccharide biosynthetic process	3/168	74/23210	0.0165947	0.368217	0.353243	Mup1/Serpina12/Gck	3	BP
GO:0042098	GO:0042098	T cell proliferation	5/168	205/23210	0.0169075	0.371035	0.355946	Cd6/Itgal/Prkcq/Ptpn22/Rasal3	5	BP
GO:1904950	GO:1904950	negative regulation of establishment of protein localization	5/168	209/23210	0.0182211	0.395517	0.379432	Cyp51/Mup1/Bank1/Inhbb/Ptpn22	5	BP
GO:0016052	GO:0016052	carbohydrate catabolic process	4/168	140/23210	0.0189925	0.407829	0.391244	Aldoc/Treh/Adrb1/Gck	4	BP
GO:0055088	GO:0055088	lipid homeostasis	4/168	141/23210	0.0194399	0.412682	0.3959	Apoc3/Cyp7b1/Adrb1/Gck	4	BP
GO:0010043	GO:0010043	response to zinc ion	2/168	30/23210	0.0198385	0.412682	0.3959	Mt1/Mt2	2	BP
GO:0042168	GO:0042168	heme metabolic process	2/168	30/23210	0.0198385	0.412682	0.3959	Alas1/Atpif1	2	BP
GO:0019318	GO:0019318	hexose metabolic process	5/168	217/23210	0.0210468	0.430113	0.412622	Mup1/Onecut1/Serpina12/Tff3/Gck	5	BP
GO:0001832	GO:0001832	blastocyst growth	2/168	31/23210	0.0211072	0.430113	0.412622	Dmbt1/Rad51b	2	BP
GO:0010675	GO:0010675	regulation of cellular carbohydrate metabolic process	4/168	146/23210	0.0217744	0.435255	0.417555	Mup1/Serpina12/Tff3/Gck	4	BP
GO:0042445	GO:0042445	hormone metabolic process	5/168	219/23210	0.0217954	0.435255	0.417555	Adh4/Afp/Hsd3b5/Sult1b1/Dio3	5	BP
GO:1901652	GO:1901652	response to peptide	7/168	384/23210	0.0220759	0.436491	0.418741	Apoc3/Serpina12/Serpina1e/Gck/Inhbb/Prkcq/Ptpn22	7	BP
GO:0003016	GO:0003016	respiratory system process	2/168	32/23210	0.0224088	0.438729	0.420887	Tnnc1/Nlgn2	2	BP
GO:0050714	GO:0050714	positive regulation of protein secretion	6/168	302/23210	0.0229246	0.444471	0.426396	Adrb1/Baiap3/Gck/Nlgn2/Prkcq/Ptpn22	6	BP
GO:0071827	GO:0071827	plasma lipoprotein particle organization	2/168	33/23210	0.0237427	0.448054	0.429833	Apom/Pla2g7	2	BP
GO:0050670	GO:0050670	regulation of lymphocyte proliferation	5/168	225/23210	0.0241446	0.448054	0.429833	Cd6/Itgal/Prkcq/Ptpn22/Rasal3	5	BP
GO:0070509	GO:0070509	calcium ion import	3/168	86/23210	0.0246118	0.448054	0.429833	Cacna1c/Adrb1/Gck	3	BP
GO:0032944	GO:0032944	regulation of mononuclear cell proliferation	5/168	227/23210	0.0249625	0.448054	0.429833	Cd6/Itgal/Prkcq/Ptpn22/Rasal3	5	BP
GO:0044275	GO:0044275	cellular carbohydrate catabolic process	2/168	34/23210	0.0251085	0.448054	0.429833	Treh/Adrb1	2	BP
GO:0090276	GO:0090276	regulation of peptide hormone secretion	5/168	228/23210	0.0253781	0.448054	0.429833	Mup1/Baiap3/Gck/Inhbb/Nlgn2	5	BP
GO:0006937	GO:0006937	regulation of muscle contraction	4/168	154/23210	0.025853	0.448054	0.429833	Cacna1c/Chrm3/Tnnc1/Adrb1	4	BP
GO:0006112	GO:0006112	energy reserve metabolic process	3/168	88/23210	0.0261178	0.448054	0.429833	Mup1/Adrb1/Gck	3	BP
GO:0032024	GO:0032024	positive regulation of insulin secretion	3/168	88/23210	0.0261178	0.448054	0.429833	Baiap3/Gck/Nlgn2	3	BP
GO:0009069	GO:0009069	serine family amino acid metabolic process	2/168	35/23210	0.0265056	0.448054	0.429833	Csad/Phgdh	2	BP
GO:0019432	GO:0019432	triglyceride biosynthetic process	2/168	35/23210	0.0265056	0.448054	0.429833	Apoc3/Thrsp	2	BP
GO:0019835	GO:0019835	cytolysis	2/168	35/23210	0.0265056	0.448054	0.429833	Mmd2/Gzmb	2	BP
GO:0034381	GO:0034381	plasma lipoprotein particle clearance	2/168	35/23210	0.0265056	0.448054	0.429833	Apoc3/Apom	2	BP
GO:0046686	GO:0046686	response to cadmium ion	2/168	35/23210	0.0265056	0.448054	0.429833	Mt1/Mt2	2	BP
GO:1903578	GO:1903578	regulation of ATP metabolic process	3/168	89/23210	0.0268889	0.448054	0.429833	Apoc3/Atpif1/Gck	3	BP
GO:0045833	GO:0045833	negative regulation of lipid metabolic process	3/168	90/23210	0.0276722	0.448054	0.429833	Apoc3/Mup1/Serpina12	3	BP
GO:0060395	GO:0060395	SMAD protein signal transduction	3/168	90/23210	0.0276722	0.448054	0.429833	Afp/Nodal/Inhbb	3	BP
GO:0098659	GO:0098659	inorganic cation import across plasma membrane	3/168	90/23210	0.0276722	0.448054	0.429833	Atp4a/Adrb1/Kcnj9	3	BP
GO:0099587	GO:0099587	inorganic ion import across plasma membrane	3/168	90/23210	0.0276722	0.448054	0.429833	Atp4a/Adrb1/Kcnj9	3	BP
GO:0009072	GO:0009072	aromatic amino acid family metabolic process	2/168	36/23210	0.0279335	0.448054	0.429833	Acmsd/Dct	2	BP
GO:0071709	GO:0071709	membrane assembly	2/168	36/23210	0.0279335	0.448054	0.429833	S100a10/Nlgn2	2	BP
GO:0070252	GO:0070252	actin-mediated cell contraction	3/168	91/23210	0.0284675	0.448054	0.429833	Cacna1c/Tnnc1/Adrb1	3	BP
GO:0001678	GO:0001678	cellular glucose homeostasis	4/168	159/23210	0.02862	0.448054	0.429833	Apoc3/Mup1/Baiap3/Gck	4	BP
GO:0046887	GO:0046887	positive regulation of hormone secretion	4/168	159/23210	0.02862	0.448054	0.429833	Baiap3/Gck/Inhbb/Nlgn2	4	BP
GO:0007159	GO:0007159	leukocyte cell-cell adhesion	6/168	319/23210	0.0289345	0.448054	0.429833	S100a8/Cd6/Itgal/Prkcq/Ptpn22/Rasal3	6	BP
GO:0033144	GO:0033144	negative regulation of intracellular steroid hormone receptor signaling pathway	2/168	37/23210	0.0293916	0.448054	0.429833	Cyp7b1/Nodal	2	BP
GO:0046640	GO:0046640	regulation of alpha-beta T cell proliferation	2/168	37/23210	0.0293916	0.448054	0.429833	Ptpn22/Rasal3	2	BP
GO:0071825	GO:0071825	protein-lipid complex subunit organization	2/168	37/23210	0.0293916	0.448054	0.429833	Apom/Pla2g7	2	BP
GO:0006778	GO:0006778	porphyrin-containing compound metabolic process	2/168	38/23210	0.0308795	0.453468	0.435027	Alas1/Atpif1	2	BP
GO:0010907	GO:0010907	positive regulation of glucose metabolic process	2/168	38/23210	0.0308795	0.453468	0.435027	Mup1/Gck	2	BP
GO:0046460	GO:0046460	neutral lipid biosynthetic process	2/168	38/23210	0.0308795	0.453468	0.435027	Apoc3/Thrsp	2	BP
GO:0046463	GO:0046463	acylglycerol biosynthetic process	2/168	38/23210	0.0308795	0.453468	0.435027	Apoc3/Thrsp	2	BP
GO:0043434	GO:0043434	response to peptide hormone	6/168	324/23210	0.0308821	0.453468	0.435027	Apoc3/Serpina12/Serpina1e/Gck/Inhbb/Prkcq	6	BP
GO:0043255	GO:0043255	regulation of carbohydrate biosynthetic process	3/168	95/23210	0.0317694	0.463092	0.444259	Mup1/Serpina12/Gck	3	BP
GO:0008207	GO:0008207	C21-steroid hormone metabolic process	2/168	39/23210	0.0323967	0.468813	0.449748	Afp/Hsd3b5	2	BP
GO:0070661	GO:0070661	leukocyte proliferation	6/168	331/23210	0.0337503	0.479958	0.460439	Ocstamp/Cd6/Itgal/Prkcq/Ptpn22/Rasal3	6	BP
GO:0046633	GO:0046633	alpha-beta T cell proliferation	2/168	40/23210	0.0339427	0.479958	0.460439	Ptpn22/Rasal3	2	BP
GO:0086004	GO:0086004	regulation of cardiac muscle cell contraction	2/168	40/23210	0.0339427	0.479958	0.460439	Cacna1c/Adrb1	2	BP
GO:0005996	GO:0005996	monosaccharide metabolic process	5/168	247/23210	0.0341282	0.479958	0.460439	Mup1/Onecut1/Serpina12/Tff3/Gck	5	BP
GO:0046916	GO:0046916	cellular transition metal ion homeostasis	3/168	98/23210	0.0343718	0.480003	0.460483	Mt1/Mt2/Scara5	3	BP
GO:0006641	GO:0006641	triglyceride metabolic process	3/168	99/23210	0.0352631	0.482408	0.46279	Apoc3/Serpina12/Thrsp	3	BP
GO:0046890	GO:0046890	regulation of lipid biosynthetic process	4/168	170/23210	0.0353069	0.482408	0.46279	Apoc3/Mup1/Serpina12/Thrsp	4	BP
GO:0046164	GO:0046164	alcohol catabolic process	2/168	41/23210	0.0355169	0.482408	0.46279	Adh4/Sult1b1	2	BP
GO:0002377	GO:0002377	immunoglobulin production	5/168	252/23210	0.0367062	0.482408	0.46279	Igkv1-117/Igkv3-12/Igkv3-2/Igkv4-57/Igkv9-120	5	BP
GO:0010883	GO:0010883	regulation of lipid storage	2/168	42/23210	0.0371189	0.482408	0.46279	Fitm1/Mup1	2	BP
GO:0042307	GO:0042307	positive regulation of protein import into nucleus	2/168	43/23210	0.0387483	0.482408	0.46279	Prkcq/Ptpn22	2	BP
GO:0042462	GO:0042462	eye photoreceptor cell development	2/168	43/23210	0.0387483	0.482408	0.46279	Gnat1/Dio3	2	BP
GO:0044091	GO:0044091	membrane biogenesis	2/168	43/23210	0.0387483	0.482408	0.46279	S100a10/Nlgn2	2	BP
GO:0046634	GO:0046634	regulation of alpha-beta T cell activation	3/168	104/23210	0.0398973	0.482408	0.46279	Prkcq/Ptpn22/Rasal3	3	BP
GO:0006109	GO:0006109	regulation of carbohydrate metabolic process	4/168	178/23210	0.0406925	0.482408	0.46279	Mup1/Serpina12/Tff3/Gck	4	BP
GO:0034754	GO:0034754	cellular hormone metabolic process	3/168	105/23210	0.0408594	0.482408	0.46279	Adh4/Afp/Hsd3b5	3	BP
GO:0022600	GO:0022600	digestive system process	3/168	106/23210	0.0418332	0.482408	0.46279	Chrm3/Tff3/Adrb1	3	BP
GO:0003014	GO:0003014	renal system process	3/168	107/23210	0.0428187	0.482408	0.46279	Cacna1c/Adrb1/Jchain	3	BP
GO:0009749	GO:0009749	response to glucose	4/168	181/23210	0.042826	0.482408	0.46279	Apoc3/Mup1/Baiap3/Gck	4	BP
GO:1901605	GO:1901605	alpha-amino acid metabolic process	4/168	181/23210	0.042826	0.482408	0.46279	Acmsd/Dct/Csad/Phgdh	4	BP
GO:0033013	GO:0033013	tetrapyrrole metabolic process	2/168	46/23210	0.0437955	0.482408	0.46279	Alas1/Atpif1	2	BP
GO:0072604	GO:0072604	interleukin-6 secretion	2/168	46/23210	0.0437955	0.482408	0.46279	Bank1/Ptpn22	2	BP
GO:0042593	GO:0042593	glucose homeostasis	5/168	265/23210	0.0439588	0.482408	0.46279	Apoc3/Cacna1c/Mup1/Baiap3/Gck	5	BP
GO:0033500	GO:0033500	carbohydrate homeostasis	5/168	266/23210	0.0445498	0.482408	0.46279	Apoc3/Cacna1c/Mup1/Baiap3/Gck	5	BP
GO:0018958	GO:0018958	phenol-containing compound metabolic process	3/168	109/23210	0.0448243	0.482408	0.46279	Dct/Sult1b1/Dio3	3	BP
GO:0009746	GO:0009746	response to hexose	4/168	184/23210	0.0450215	0.482408	0.46279	Apoc3/Mup1/Baiap3/Gck	4	BP
GO:0034284	GO:0034284	response to monosaccharide	4/168	185/23210	0.0457672	0.482408	0.46279	Apoc3/Mup1/Baiap3/Gck	4	BP
GO:0046879	GO:0046879	hormone secretion	6/168	357/23210	0.0458907	0.482408	0.46279	Cacna1c/Mup1/Baiap3/Gck/Inhbb/Nlgn2	6	BP
GO:0007157	GO:0007157	heterophilic cell-cell adhesion via plasma membrane cell adhesion molecules	2/168	48/23210	0.0472883	0.482408	0.46279	Cd6/Itgal	2	BP
GO:0010862	GO:0010862	positive regulation of pathway-restricted SMAD protein phosphorylation	2/168	48/23210	0.0472883	0.482408	0.46279	Nodal/Inhbb	2	BP
GO:1904591	GO:1904591	positive regulation of protein import	2/168	48/23210	0.0472883	0.482408	0.46279	Prkcq/Ptpn22	2	BP
GO:1990573	GO:1990573	potassium ion import across plasma membrane	2/168	48/23210	0.0472883	0.482408	0.46279	Atp4a/Kcnj9	2	BP
GO:0006805	GO:0006805	xenobiotic metabolic process	3/168	112/23210	0.047919	0.482408	0.46279	Sult1b1/Csad/Phgdh	3	BP
GO:0006939	GO:0006939	smooth muscle contraction	3/168	112/23210	0.047919	0.482408	0.46279	Cacna1c/Chrm3/Adrb1	3	BP
GO:0030048	GO:0030048	actin filament-based movement	3/168	112/23210	0.047919	0.482408	0.46279	Cacna1c/Tnnc1/Adrb1	3	BP
GO:0006790	GO:0006790	sulfur compound metabolic process	5/168	272/23210	0.0481961	0.482408	0.46279	Acnat2/Nat8/Sult1b1/Csad/Phgdh	5	BP
GO:0009914	GO:0009914	hormone transport	6/168	362/23210	0.0485003	0.482408	0.46279	Cacna1c/Mup1/Baiap3/Gck/Inhbb/Nlgn2	6	BP
GO:0017001	GO:0017001	antibiotic catabolic process	2/168	49/23210	0.0490718	0.482408	0.46279	Adh4/Sult1b1	2	BP
GO:0032941	GO:0032941	secretion by tissue	2/168	49/23210	0.0490718	0.482408	0.46279	Chrm3/Adrb1	2	BP
GO:0031663	GO:0031663	lipopolysaccharide-mediated signaling pathway	2/168	50/23210	0.0508794	0.482408	0.46279	Cd6/Ptpn22	2	BP
GO:0051055	GO:0051055	negative regulation of lipid biosynthetic process	2/168	50/23210	0.0508794	0.482408	0.46279	Mup1/Serpina12	2	BP
GO:0032869	GO:0032869	cellular response to insulin stimulus	4/168	193/23210	0.0519801	0.482408	0.46279	Serpina12/Gck/Inhbb/Prkcq	4	BP
GO:0016053	GO:0016053	organic acid biosynthetic process	5/168	282/23210	0.0546559	0.482408	0.46279	Acmsd/Cyp7b1/Elovl3/Csad/Phgdh	5	BP
GO:0043280	GO:0043280	positive regulation of cysteine-type endopeptidase activity involved in apoptotic process	3/168	119/23210	0.0555359	0.482408	0.46279	Diablo/Nodal/S100a8	3	BP
GO:0009743	GO:0009743	response to carbohydrate	4/168	198/23210	0.056086	0.482408	0.46279	Apoc3/Mup1/Baiap3/Gck	4	BP
GO:0090277	GO:0090277	positive regulation of peptide hormone secretion	3/168	120/23210	0.0566685	0.482408	0.46279	Baiap3/Gck/Nlgn2	3	BP
GO:1901653	GO:1901653	cellular response to peptide	5/168	287/23210	0.0580653	0.482408	0.46279	Serpina12/Gck/Inhbb/Prkcq/Ptpn22	5	BP
GO:1903037	GO:1903037	regulation of leukocyte cell-cell adhesion	5/168	287/23210	0.0580653	0.482408	0.46279	Cd6/Itgal/Prkcq/Ptpn22/Rasal3	5	BP
GO:0007585	GO:0007585	respiratory gaseous exchange by respiratory system	2/168	54/23210	0.0583421	0.482408	0.46279	Tnnc1/Nlgn2	2	BP
GO:0044060	GO:0044060	regulation of endocrine process	2/168	54/23210	0.0583421	0.482408	0.46279	Adrb1/Inhbb	2	BP
GO:0051290	GO:0051290	protein heterotetramerization	2/168	54/23210	0.0583421	0.482408	0.46279	Aldoc/S100a10	2	BP
GO:0051496	GO:0051496	positive regulation of stress fiber assembly	2/168	54/23210	0.0583421	0.482408	0.46279	S100a10/Prkcq	2	BP
GO:0010876	GO:0010876	lipid localization	6/168	380/23210	0.0586443	0.482408	0.46279	Apoc3/Apom/Fitm1/Mup1/Slco1a1/Sqle	6	BP
GO:0006639	GO:0006639	acylglycerol metabolic process	3/168	122/23210	0.0589666	0.482408	0.46279	Apoc3/Serpina12/Thrsp	3	BP
GO:1903532	GO:1903532	positive regulation of secretion by cell	7/168	477/23210	0.0590484	0.482408	0.46279	Adrb1/Baiap3/Gck/Inhbb/Nlgn2/Prkcq/Ptpn22	7	BP
GO:0046676	GO:0046676	negative regulation of insulin secretion	2/168	55/23210	0.0602637	0.482408	0.46279	Mup1/Inhbb	2	BP
GO:0006936	GO:0006936	muscle contraction	5/168	291/23210	0.0608791	0.482408	0.46279	Cacna1c/Chrm3/Tnnc1/Adrb1/Tmod4	5	BP
GO:0007188	GO:0007188	adenylate cyclase-modulating G protein-coupled receptor signaling pathway	4/168	204/23210	0.0612372	0.482408	0.46279	Chrm3/Gnat1/Adgre1/Adrb1	4	BP
GO:0006638	GO:0006638	neutral lipid metabolic process	3/168	124/23210	0.0613081	0.482408	0.46279	Apoc3/Serpina12/Thrsp	3	BP
GO:0060048	GO:0060048	cardiac muscle contraction	3/168	126/23210	0.0636926	0.482408	0.46279	Cacna1c/Tnnc1/Adrb1	3	BP
GO:0006091	GO:0006091	generation of precursor metabolites and energy	6/168	389/23210	0.0641591	0.482408	0.46279	Adh4/Aldoc/Apoc3/Mup1/Adrb1/Gck	6	BP
GO:0001754	GO:0001754	eye photoreceptor cell differentiation	2/168	57/23210	0.0641712	0.482408	0.46279	Gnat1/Dio3	2	BP
GO:0046883	GO:0046883	regulation of hormone secretion	5/168	296/23210	0.0645038	0.482408	0.46279	Mup1/Baiap3/Gck/Inhbb/Nlgn2	5	BP
GO:0032970	GO:0032970	regulation of actin filament-based process	6/168	393/23210	0.0667053	0.482408	0.46279	Cacna1c/S100a10/Tnnc1/Adrb1/Prkcq/Tmod4	6	BP
GO:0060326	GO:0060326	cell chemotaxis	5/168	299/23210	0.0667358	0.482408	0.46279	Cyp7b1/S100a8/Csf3r/Pla2g7/Prkcq	5	BP
GO:0055076	GO:0055076	transition metal ion homeostasis	3/168	129/23210	0.0673488	0.482408	0.46279	Mt1/Mt2/Scara5	3	BP
GO:0098739	GO:0098739	import across plasma membrane	3/168	129/23210	0.0673488	0.482408	0.46279	Atp4a/Adrb1/Kcnj9	3	BP
GO:0022407	GO:0022407	regulation of cell-cell adhesion	6/168	394/23210	0.067351	0.482408	0.46279	Nodal/Cd6/Itgal/Prkcq/Ptpn22/Rasal3	6	BP
GO:0051251	GO:0051251	positive regulation of lymphocyte activation	6/168	394/23210	0.067351	0.482408	0.46279	Cd6/Ighv8-8/Itgal/Prkcq/Ptpn22/Rasal3	6	BP
GO:0030595	GO:0030595	leukocyte chemotaxis	4/168	211/23210	0.0675532	0.482408	0.46279	Cyp7b1/S100a8/Csf3r/Pla2g7	4	BP
GO:0010676	GO:0010676	positive regulation of cellular carbohydrate metabolic process	2/168	59/23210	0.0681617	0.482408	0.46279	Mup1/Gck	2	BP
GO:0043462	GO:0043462	regulation of ATPase activity	2/168	59/23210	0.0681617	0.482408	0.46279	Atpif1/Tnnc1	2	BP
GO:0001654	GO:0001654	eye development	6/168	397/23210	0.0693099	0.482408	0.46279	Cacna1c/Crygn/Gnat1/Pitx3/Dio3/Inhbb	6	BP
GO:0002645	GO:0002645	positive regulation of tolerance induction	1/168	10/23210	0.070083	0.482408	0.46279	Irak3	1	BP
GO:0007158	GO:0007158	neuron cell-cell adhesion	1/168	10/23210	0.070083	0.482408	0.46279	Nlgn2	1	BP
GO:0007603	GO:0007603	phototransduction, visible light	1/168	10/23210	0.070083	0.482408	0.46279	Gnat1	1	BP
GO:0014883	GO:0014883	transition between fast and slow fiber	1/168	10/23210	0.070083	0.482408	0.46279	Tnnc1	1	BP
GO:0018026	GO:0018026	peptidyl-lysine monomethylation	1/168	10/23210	0.070083	0.482408	0.46279	Setd7	1	BP
GO:0019336	GO:0019336	phenol-containing compound catabolic process	1/168	10/23210	0.070083	0.482408	0.46279	Dio3	1	BP
GO:0030049	GO:0030049	muscle filament sliding	1/168	10/23210	0.070083	0.482408	0.46279	Tnnc1	1	BP
GO:0032927	GO:0032927	positive regulation of activin receptor signaling pathway	1/168	10/23210	0.070083	0.482408	0.46279	Nodal	1	BP
GO:0034145	GO:0034145	positive regulation of toll-like receptor 4 signaling pathway	1/168	10/23210	0.070083	0.482408	0.46279	Ptpn22	1	BP
GO:0034380	GO:0034380	high-density lipoprotein particle assembly	1/168	10/23210	0.070083	0.482408	0.46279	Apom	1	BP
GO:0035811	GO:0035811	negative regulation of urine volume	1/168	10/23210	0.070083	0.482408	0.46279	Adrb1	1	BP
GO:0045607	GO:0045607	regulation of inner ear auditory receptor cell differentiation	1/168	10/23210	0.070083	0.482408	0.46279	Mycl	1	BP
GO:0045631	GO:0045631	regulation of mechanoreceptor differentiation	1/168	10/23210	0.070083	0.482408	0.46279	Mycl	1	BP
GO:0046884	GO:0046884	follicle-stimulating hormone secretion	1/168	10/23210	0.070083	0.482408	0.46279	Inhbb	1	BP
GO:0048242	GO:0048242	epinephrine secretion	1/168	10/23210	0.070083	0.482408	0.46279	Gck	1	BP
GO:0048382	GO:0048382	mesendoderm development	1/168	10/23210	0.070083	0.482408	0.46279	Nodal	1	BP
GO:0051133	GO:0051133	regulation of NK T cell activation	1/168	10/23210	0.070083	0.482408	0.46279	Rasal3	1	BP
GO:0071257	GO:0071257	cellular response to electrical stimulus	1/168	10/23210	0.070083	0.482408	0.46279	Gnat1	1	BP
GO:0072674	GO:0072674	multinuclear osteoclast differentiation	1/168	10/23210	0.070083	0.482408	0.46279	Ocstamp	1	BP
GO:0090009	GO:0090009	primitive streak formation	1/168	10/23210	0.070083	0.482408	0.46279	Nodal	1	BP
GO:0097105	GO:0097105	presynaptic membrane assembly	1/168	10/23210	0.070083	0.482408	0.46279	Nlgn2	1	BP
GO:0097119	GO:0097119	postsynaptic density protein 95 clustering	1/168	10/23210	0.070083	0.482408	0.46279	Nlgn2	1	BP
GO:1901142	GO:1901142	insulin metabolic process	1/168	10/23210	0.070083	0.482408	0.46279	Nlgn2	1	BP
GO:1990504	GO:1990504	dense core granule exocytosis	1/168	10/23210	0.070083	0.482408	0.46279	Baiap3	1	BP
GO:2000318	GO:2000318	positive regulation of T-helper 17 type immune response	1/168	10/23210	0.070083	0.482408	0.46279	Prkcq	1	BP
GO:2000807	GO:2000807	regulation of synaptic vesicle clustering	1/168	10/23210	0.070083	0.482408	0.46279	Nlgn2	1	BP
GO:2000980	GO:2000980	regulation of inner ear receptor cell differentiation	1/168	10/23210	0.070083	0.482408	0.46279	Mycl	1	BP
GO:0045824	GO:0045824	negative regulation of innate immune response	2/168	60/23210	0.0701871	0.482408	0.46279	Susd4/Irak3	2	BP
GO:0046847	GO:0046847	filopodium assembly	2/168	60/23210	0.0701871	0.482408	0.46279	Fgd3/Prkcq	2	BP
GO:0097479	GO:0097479	synaptic vesicle localization	2/168	60/23210	0.0701871	0.482408	0.46279	Nlgn2/Syn1	2	BP
GO:0050863	GO:0050863	regulation of T cell activation	5/168	304/23210	0.0705508	0.482408	0.46279	Cd6/Itgal/Prkcq/Ptpn22/Rasal3	5	BP
GO:0150063	GO:0150063	visual system development	6/168	400/23210	0.0713018	0.482408	0.46279	Cacna1c/Crygn/Gnat1/Pitx3/Dio3/Inhbb	6	BP
GO:0009991	GO:0009991	response to extracellular stimulus	6/168	401/23210	0.071973	0.482408	0.46279	Dctpp1/Dntt/Mup1/Adrb1/Gck/Inhbb	6	BP
GO:0042461	GO:0042461	photoreceptor cell development	2/168	61/23210	0.072232	0.482408	0.46279	Gnat1/Dio3	2	BP
GO:0048880	GO:0048880	sensory system development	6/168	403/23210	0.0733264	0.482408	0.46279	Cacna1c/Crygn/Gnat1/Pitx3/Dio3/Inhbb	6	BP
GO:0046651	GO:0046651	lymphocyte proliferation	5/168	308/23210	0.073688	0.482408	0.46279	Cd6/Itgal/Prkcq/Ptpn22/Rasal3	5	BP
GO:0032720	GO:0032720	negative regulation of tumor necrosis factor production	2/168	62/23210	0.0742962	0.482408	0.46279	Irak3/Ptpn22	2	BP
GO:0034308	GO:0034308	primary alcohol metabolic process	2/168	62/23210	0.0742962	0.482408	0.46279	Adh4/Sult1b1	2	BP
GO:0060393	GO:0060393	regulation of pathway-restricted SMAD protein phosphorylation	2/168	62/23210	0.0742962	0.482408	0.46279	Nodal/Inhbb	2	BP
GO:0032943	GO:0032943	mononuclear cell proliferation	5/168	310/23210	0.0752848	0.482408	0.46279	Cd6/Itgal/Prkcq/Ptpn22/Rasal3	5	BP
GO:2001056	GO:2001056	positive regulation of cysteine-type endopeptidase activity	3/168	136/23210	0.076242	0.482408	0.46279	Diablo/Nodal/S100a8	3	BP
GO:0034121	GO:0034121	regulation of toll-like receptor signaling pathway	2/168	63/23210	0.0763791	0.482408	0.46279	Irak3/Ptpn22	2	BP
GO:0060999	GO:0060999	positive regulation of dendritic spine development	2/168	63/23210	0.0763791	0.482408	0.46279	D16Ertd472e/Nlgn2	2	BP
GO:1903556	GO:1903556	negative regulation of tumor necrosis factor superfamily cytokine production	2/168	63/23210	0.0763791	0.482408	0.46279	Irak3/Ptpn22	2	BP
GO:0001765	GO:0001765	membrane raft assembly	1/168	11/23210	0.0768169	0.482408	0.46279	S100a10	1	BP
GO:0002923	GO:0002923	regulation of humoral immune response mediated by circulating immunoglobulin	1/168	11/23210	0.0768169	0.482408	0.46279	Susd4	1	BP
GO:0006568	GO:0006568	tryptophan metabolic process	1/168	11/23210	0.0768169	0.482408	0.46279	Acmsd	1	BP
GO:0006570	GO:0006570	tyrosine metabolic process	1/168	11/23210	0.0768169	0.482408	0.46279	Dct	1	BP
GO:0006586	GO:0006586	indolalkylamine metabolic process	1/168	11/23210	0.0768169	0.482408	0.46279	Acmsd	1	BP
GO:0008626	GO:0008626	granzyme-mediated apoptotic signaling pathway	1/168	11/23210	0.0768169	0.482408	0.46279	Gzmb	1	BP
GO:0009812	GO:0009812	flavonoid metabolic process	1/168	11/23210	0.0768169	0.482408	0.46279	Sult1b1	1	BP
GO:0046386	GO:0046386	deoxyribose phosphate catabolic process	1/168	11/23210	0.0768169	0.482408	0.46279	Dctpp1	1	BP
GO:0046532	GO:0046532	regulation of photoreceptor cell differentiation	1/168	11/23210	0.0768169	0.482408	0.46279	Dio3	1	BP
GO:0048241	GO:0048241	epinephrine transport	1/168	11/23210	0.0768169	0.482408	0.46279	Gck	1	BP
GO:0051385	GO:0051385	response to mineralocorticoid	1/168	11/23210	0.0768169	0.482408	0.46279	Hsd3b5	1	BP
GO:0072641	GO:0072641	type I interferon secretion	1/168	11/23210	0.0768169	0.482408	0.46279	Ptpn22	1	BP
GO:0072642	GO:0072642	interferon-alpha secretion	1/168	11/23210	0.0768169	0.482408	0.46279	Ptpn22	1	BP
GO:0086016	GO:0086016	AV node cell action potential	1/168	11/23210	0.0768169	0.482408	0.46279	Cacna1c	1	BP
GO:0086027	GO:0086027	AV node cell to bundle of His cell signaling	1/168	11/23210	0.0768169	0.482408	0.46279	Cacna1c	1	BP
GO:0090209	GO:0090209	negative regulation of triglyceride metabolic process	1/168	11/23210	0.0768169	0.482408	0.46279	Apoc3	1	BP
GO:0097104	GO:0097104	postsynaptic membrane assembly	1/168	11/23210	0.0768169	0.482408	0.46279	Nlgn2	1	BP
GO:1901030	GO:1901030	positive regulation of mitochondrial outer membrane permeabilization involved in apoptotic signaling pathway	1/168	11/23210	0.0768169	0.482408	0.46279	Atpif1	1	BP
GO:1901163	GO:1901163	regulation of trophoblast cell migration	1/168	11/23210	0.0768169	0.482408	0.46279	Nodal	1	BP
GO:1902514	GO:1902514	regulation of calcium ion transmembrane transport via high voltage-gated calcium channel	1/168	11/23210	0.0768169	0.482408	0.46279	Cacna1c	1	BP
GO:1902739	GO:1902739	regulation of interferon-alpha secretion	1/168	11/23210	0.0768169	0.482408	0.46279	Ptpn22	1	BP
GO:1902741	GO:1902741	positive regulation of interferon-alpha secretion	1/168	11/23210	0.0768169	0.482408	0.46279	Ptpn22	1	BP
GO:1904862	GO:1904862	inhibitory synapse assembly	1/168	11/23210	0.0768169	0.482408	0.46279	Nlgn2	1	BP
GO:0019748	GO:0019748	secondary metabolic process	2/168	64/23210	0.0784804	0.482408	0.46279	Acmsd/Dct	2	BP
GO:0032233	GO:0032233	positive regulation of actin filament bundle assembly	2/168	64/23210	0.0784804	0.482408	0.46279	S100a10/Prkcq	2	BP
GO:0034605	GO:0034605	cellular response to heat	2/168	64/23210	0.0784804	0.482408	0.46279	Hsbp1l1/Scara5	2	BP
GO:0042306	GO:0042306	regulation of protein import into nucleus	2/168	64/23210	0.0784804	0.482408	0.46279	Prkcq/Ptpn22	2	BP
GO:0046824	GO:0046824	positive regulation of nucleocytoplasmic transport	2/168	64/23210	0.0784804	0.482408	0.46279	Prkcq/Ptpn22	2	BP
GO:0052547	GO:0052547	regulation of peptidase activity	6/168	411/23210	0.0788858	0.482408	0.46279	Diablo/Itih5/Nodal/S100a8/Serpina12/Serpina1e	6	BP
GO:0031668	GO:0031668	cellular response to extracellular stimulus	4/168	223/23210	0.0791329	0.482408	0.46279	Dctpp1/Mup1/Gck/Inhbb	4	BP
GO:0060389	GO:0060389	pathway-restricted SMAD protein phosphorylation	2/168	65/23210	0.0805997	0.482408	0.46279	Nodal/Inhbb	2	BP
GO:0032868	GO:0032868	response to insulin	4/168	225/23210	0.0811534	0.482408	0.46279	Serpina12/Gck/Inhbb/Prkcq	4	BP
GO:0071333	GO:0071333	cellular response to glucose stimulus	3/168	140/23210	0.0815447	0.482408	0.46279	Apoc3/Mup1/Baiap3	3	BP
GO:0086003	GO:0086003	cardiac muscle cell contraction	2/168	66/23210	0.0827368	0.482408	0.46279	Cacna1c/Adrb1	2	BP
GO:0090278	GO:0090278	negative regulation of peptide hormone secretion	2/168	66/23210	0.0827368	0.482408	0.46279	Mup1/Inhbb	2	BP
GO:0045017	GO:0045017	glycerolipid biosynthetic process	3/168	141/23210	0.0828948	0.482408	0.46279	Apoc3/Etnk2/Thrsp	3	BP
GO:0046165	GO:0046165	alcohol biosynthetic process	3/168	141/23210	0.0828948	0.482408	0.46279	Cyp51/Nsdhl/Tm7sf2	3	BP
GO:0001787	GO:0001787	natural killer cell proliferation	1/168	12/23210	0.0835023	0.482408	0.46279	Ptpn22	1	BP
GO:0002921	GO:0002921	negative regulation of humoral immune response	1/168	12/23210	0.0835023	0.482408	0.46279	Susd4	1	BP
GO:0006534	GO:0006534	cysteine metabolic process	1/168	12/23210	0.0835023	0.482408	0.46279	Csad	1	BP
GO:0006957	GO:0006957	complement activation, alternative pathway	1/168	12/23210	0.0835023	0.482408	0.46279	Susd4	1	BP
GO:0009219	GO:0009219	pyrimidine deoxyribonucleotide metabolic process	1/168	12/23210	0.0835023	0.482408	0.46279	Dctpp1	1	BP
GO:0009264	GO:0009264	deoxyribonucleotide catabolic process	1/168	12/23210	0.0835023	0.482408	0.46279	Dctpp1	1	BP
GO:0010889	GO:0010889	regulation of sequestering of triglyceride	1/168	12/23210	0.0835023	0.482408	0.46279	Fitm1	1	BP
GO:0014832	GO:0014832	urinary bladder smooth muscle contraction	1/168	12/23210	0.0835023	0.482408	0.46279	Cacna1c	1	BP
GO:0030388	GO:0030388	fructose 1,6-bisphosphate metabolic process	1/168	12/23210	0.0835023	0.482408	0.46279	Aldoc	1	BP
GO:0033275	GO:0033275	actin-myosin filament sliding	1/168	12/23210	0.0835023	0.482408	0.46279	Tnnc1	1	BP
GO:0034375	GO:0034375	high-density lipoprotein particle remodeling	1/168	12/23210	0.0835023	0.482408	0.46279	Apom	1	BP
GO:0043691	GO:0043691	reverse cholesterol transport	1/168	12/23210	0.0835023	0.482408	0.46279	Apom	1	BP
GO:0045086	GO:0045086	positive regulation of interleukin-2 biosynthetic process	1/168	12/23210	0.0835023	0.482408	0.46279	Prkcq	1	BP
GO:0051798	GO:0051798	positive regulation of hair follicle development	1/168	12/23210	0.0835023	0.482408	0.46279	Fst	1	BP
GO:0060073	GO:0060073	micturition	1/168	12/23210	0.0835023	0.482408	0.46279	Cacna1c	1	BP
GO:0061450	GO:0061450	trophoblast cell migration	1/168	12/23210	0.0835023	0.482408	0.46279	Nodal	1	BP
GO:0061577	GO:0061577	calcium ion transmembrane transport via high voltage-gated calcium channel	1/168	12/23210	0.0835023	0.482408	0.46279	Cacna1c	1	BP
GO:0070423	GO:0070423	nucleotide-binding oligomerization domain containing signaling pathway	1/168	12/23210	0.0835023	0.482408	0.46279	Ptpn22	1	BP
GO:0070431	GO:0070431	nucleotide-binding oligomerization domain containing 2 signaling pathway	1/168	12/23210	0.0835023	0.482408	0.46279	Ptpn22	1	BP
GO:0046578	GO:0046578	regulation of Ras protein signal transduction	4/168	228/23210	0.084232	0.482408	0.46279	Mmd2/Tiam2/Fgd3/Rasal3	4	BP
GO:0071331	GO:0071331	cellular response to hexose stimulus	3/168	142/23210	0.0842545	0.482408	0.46279	Apoc3/Mup1/Baiap3	3	BP
GO:0006940	GO:0006940	regulation of smooth muscle contraction	2/168	67/23210	0.0848911	0.482408	0.46279	Chrm3/Adrb1	2	BP
GO:0050710	GO:0050710	negative regulation of cytokine secretion	2/168	67/23210	0.0848911	0.482408	0.46279	Bank1/Ptpn22	2	BP
GO:2000179	GO:2000179	positive regulation of neural precursor cell proliferation	2/168	67/23210	0.0848911	0.482408	0.46279	Dct/Pitx3	2	BP
GO:0009267	GO:0009267	cellular response to starvation	3/168	143/23210	0.0856238	0.482408	0.46279	Mup1/Gck/Inhbb	3	BP
GO:0071326	GO:0071326	cellular response to monosaccharide stimulus	3/168	143/23210	0.0856238	0.482408	0.46279	Apoc3/Mup1/Baiap3	3	BP
GO:0062012	GO:0062012	regulation of small molecule metabolic process	5/168	323/23210	0.0861193	0.482408	0.46279	Acmsd/Mup1/Serpina12/Tff3/Gck	5	BP
GO:0002065	GO:0002065	columnar/cuboidal epithelial cell differentiation	3/168	144/23210	0.0870026	0.482408	0.46279	Mycl/Nodal/Ptk6	3	BP
GO:0046486	GO:0046486	glycerolipid metabolic process	5/168	325/23210	0.0878555	0.482408	0.46279	Apoc3/Etnk2/Serpina12/Thrsp/Pla2g7	5	BP
GO:0007492	GO:0007492	endoderm development	2/168	69/23210	0.0892503	0.482408	0.46279	Nodal/Onecut1	2	BP
GO:0043407	GO:0043407	negative regulation of MAP kinase activity	2/168	69/23210	0.0892503	0.482408	0.46279	Irak3/Ptpn22	2	BP
GO:0055117	GO:0055117	regulation of cardiac muscle contraction	2/168	69/23210	0.0892503	0.482408	0.46279	Cacna1c/Adrb1	2	BP
GO:1904589	GO:1904589	regulation of protein import	2/168	69/23210	0.0892503	0.482408	0.46279	Prkcq/Ptpn22	2	BP
GO:0007187	GO:0007187	G protein-coupled receptor signaling pathway, coupled to cyclic nucleotide second messenger	4/168	233/23210	0.0894887	0.482408	0.46279	Chrm3/Gnat1/Adgre1/Adrb1	4	BP
GO:0090092	GO:0090092	regulation of transmembrane receptor protein serine/threonine kinase signaling pathway	4/168	233/23210	0.0894887	0.482408	0.46279	Fst/Nodal/Onecut1/Inhbb	4	BP
GO:0001542	GO:0001542	ovulation from ovarian follicle	1/168	13/23210	0.0901396	0.482408	0.46279	Afp	1	BP
GO:0002087	GO:0002087	regulation of respiratory gaseous exchange by nervous system process	1/168	13/23210	0.0901396	0.482408	0.46279	Nlgn2	1	BP
GO:0006544	GO:0006544	glycine metabolic process	1/168	13/23210	0.0901396	0.482408	0.46279	Phgdh	1	BP
GO:0007213	GO:0007213	G protein-coupled acetylcholine receptor signaling pathway	1/168	13/23210	0.0901396	0.482408	0.46279	Chrm3	1	BP
GO:0007501	GO:0007501	mesodermal cell fate specification	1/168	13/23210	0.0901396	0.482408	0.46279	Nodal	1	BP
GO:0009071	GO:0009071	serine family amino acid catabolic process	1/168	13/23210	0.0901396	0.482408	0.46279	Csad	1	BP
GO:0010988	GO:0010988	regulation of low-density lipoprotein particle clearance	1/168	13/23210	0.0901396	0.482408	0.46279	Apoc3	1	BP
GO:0014848	GO:0014848	urinary tract smooth muscle contraction	1/168	13/23210	0.0901396	0.482408	0.46279	Cacna1c	1	BP
GO:0031953	GO:0031953	negative regulation of protein autophosphorylation	1/168	13/23210	0.0901396	0.482408	0.46279	Gfra2	1	BP
GO:0032276	GO:0032276	regulation of gonadotropin secretion	1/168	13/23210	0.0901396	0.482408	0.46279	Inhbb	1	BP
GO:0032494	GO:0032494	response to peptidoglycan	1/168	13/23210	0.0901396	0.482408	0.46279	Irak3	1	BP
GO:0032926	GO:0032926	negative regulation of activin receptor signaling pathway	1/168	13/23210	0.0901396	0.482408	0.46279	Fst	1	BP
GO:0033147	GO:0033147	negative regulation of intracellular estrogen receptor signaling pathway	1/168	13/23210	0.0901396	0.482408	0.46279	Cyp7b1	1	BP
GO:0035872	GO:0035872	nucleotide-binding domain, leucine rich repeat containing receptor signaling pathway	1/168	13/23210	0.0901396	0.482408	0.46279	Ptpn22	1	BP
GO:0036376	GO:0036376	sodium ion export across plasma membrane	1/168	13/23210	0.0901396	0.482408	0.46279	Atp4a	1	BP
GO:0042402	GO:0042402	cellular biogenic amine catabolic process	1/168	13/23210	0.0901396	0.482408	0.46279	Acmsd	1	BP
GO:0042635	GO:0042635	positive regulation of hair cycle	1/168	13/23210	0.0901396	0.482408	0.46279	Fst	1	BP
GO:0042761	GO:0042761	very long-chain fatty acid biosynthetic process	1/168	13/23210	0.0901396	0.482408	0.46279	Elovl3	1	BP
GO:0043508	GO:0043508	negative regulation of JUN kinase activity	1/168	13/23210	0.0901396	0.482408	0.46279	Ptpn22	1	BP
GO:0051132	GO:0051132	NK T cell activation	1/168	13/23210	0.0901396	0.482408	0.46279	Rasal3	1	BP
GO:0060391	GO:0060391	positive regulation of SMAD protein signal transduction	1/168	13/23210	0.0901396	0.482408	0.46279	Nodal	1	BP
GO:0071397	GO:0071397	cellular response to cholesterol	1/168	13/23210	0.0901396	0.482408	0.46279	Inhbb	1	BP
GO:0086067	GO:0086067	AV node cell to bundle of His cell communication	1/168	13/23210	0.0901396	0.482408	0.46279	Cacna1c	1	BP
GO:0097090	GO:0097090	presynaptic membrane organization	1/168	13/23210	0.0901396	0.482408	0.46279	Nlgn2	1	BP
GO:1902715	GO:1902715	positive regulation of interferon-gamma secretion	1/168	13/23210	0.0901396	0.482408	0.46279	Ptpn22	1	BP
GO:1902916	GO:1902916	positive regulation of protein polyubiquitination	1/168	13/23210	0.0901396	0.482408	0.46279	Ptpn22	1	BP
GO:1904925	GO:1904925	positive regulation of autophagy of mitochondrion in response to mitochondrial depolarization	1/168	13/23210	0.0901396	0.482408	0.46279	Atpif1	1	BP
GO:0019932	GO:0019932	second-messenger-mediated signaling	6/168	427/23210	0.0906984	0.482408	0.46279	Mt1/Mt2/Adgre1/Adrb1/Gck/Itgal	6	BP
GO:0030856	GO:0030856	regulation of epithelial cell differentiation	3/168	147/23210	0.0911951	0.482408	0.46279	Mycl/Nodal/Dmbt1	3	BP
GO:0017156	GO:0017156	calcium-ion regulated exocytosis	2/168	70/23210	0.0914545	0.482408	0.46279	Cacna1c/Baiap3	2	BP
GO:0001824	GO:0001824	blastocyst development	3/168	149/23210	0.0940363	0.482408	0.46279	Nodal/Dmbt1/Rad51b	3	BP
GO:0071322	GO:0071322	cellular response to carbohydrate stimulus	3/168	150/23210	0.0954705	0.482408	0.46279	Apoc3/Mup1/Baiap3	3	BP
GO:0090257	GO:0090257	regulation of muscle system process	4/168	239/23210	0.0960005	0.482408	0.46279	Cacna1c/Chrm3/Tnnc1/Adrb1	4	BP
GO:0007194	GO:0007194	negative regulation of adenylate cyclase activity	1/168	14/23210	0.0967291	0.482408	0.46279	P2ry13	1	BP
GO:0009310	GO:0009310	amine catabolic process	1/168	14/23210	0.0967291	0.482408	0.46279	Acmsd	1	BP
GO:0010896	GO:0010896	regulation of triglyceride catabolic process	1/168	14/23210	0.0967291	0.482408	0.46279	Apoc3	1	BP
GO:0018119	GO:0018119	peptidyl-cysteine S-nitrosylation	1/168	14/23210	0.0967291	0.482408	0.46279	S100a8	1	BP
GO:0019886	GO:0019886	antigen processing and presentation of exogenous peptide antigen via MHC class II	1/168	14/23210	0.0967291	0.482408	0.46279	Ctse	1	BP
GO:0030007	GO:0030007	cellular potassium ion homeostasis	1/168	14/23210	0.0967291	0.482408	0.46279	Atp4a	1	BP
GO:0030497	GO:0030497	fatty acid elongation	1/168	14/23210	0.0967291	0.482408	0.46279	Elovl3	1	BP
GO:0043650	GO:0043650	dicarboxylic acid biosynthetic process	1/168	14/23210	0.0967291	0.482408	0.46279	Acmsd	1	BP
GO:0046185	GO:0046185	aldehyde catabolic process	1/168	14/23210	0.0967291	0.482408	0.46279	Adh4	1	BP
GO:0048505	GO:0048505	regulation of timing of cell differentiation	1/168	14/23210	0.0967291	0.482408	0.46279	Nodal	1	BP
GO:0060263	GO:0060263	regulation of respiratory burst	1/168	14/23210	0.0967291	0.482408	0.46279	Jchain	1	BP
GO:0070486	GO:0070486	leukocyte aggregation	1/168	14/23210	0.0967291	0.482408	0.46279	S100a8	1	BP
GO:0098911	GO:0098911	regulation of ventricular cardiac muscle cell action potential	1/168	14/23210	0.0967291	0.482408	0.46279	Cacna1c	1	BP
GO:1900221	GO:1900221	regulation of amyloid-beta clearance	1/168	14/23210	0.0967291	0.482408	0.46279	Cyp51	1	BP
GO:1904923	GO:1904923	regulation of autophagy of mitochondrion in response to mitochondrial depolarization	1/168	14/23210	0.0967291	0.482408	0.46279	Atpif1	1	BP
GO:0052548	GO:0052548	regulation of endopeptidase activity	5/168	337/23210	0.0986533	0.482408	0.46279	Diablo/Nodal/S100a8/Serpina12/Serpina1e	5	BP
GO:0051222	GO:0051222	positive regulation of protein transport	6/168	438/23210	0.0993493	0.482408	0.46279	Adrb1/Baiap3/Gck/Nlgn2/Prkcq/Ptpn22	6	BP
GO:0019216	GO:0019216	regulation of lipid metabolic process	5/168	338/23210	0.0995822	0.482408	0.46279	Apoc3/Mup1/Serpina12/Thrsp/Pik3r5	5	BP
GO:0010950	GO:0010950	positive regulation of endopeptidase activity	3/168	153/23210	0.0998267	0.482408	0.46279	Diablo/Nodal/S100a8	3	BP
GO:0032675	GO:0032675	regulation of interleukin-6 production	3/168	153/23210	0.0998267	0.482408	0.46279	Bank1/Irak3/Ptpn22	3	BP
GO:0006919	GO:0006919	activation of cysteine-type endopeptidase activity involved in apoptotic process	2/168	74/23210	0.100427	0.482408	0.46279	Diablo/S100a8	2	BP
GO:0050900	GO:0050900	leukocyte migration	5/168	340/23210	0.101453	0.482408	0.46279	Cyp7b1/S100a8/Csf3r/Pla2g7/Ptpn22	5	BP
GO:0071375	GO:0071375	cellular response to peptide hormone stimulus	4/168	244/23210	0.101593	0.482408	0.46279	Serpina12/Gck/Inhbb/Prkcq	4	BP
GO:0046626	GO:0046626	regulation of insulin receptor signaling pathway	2/168	75/23210	0.102707	0.482408	0.46279	Serpina12/Prkcq	2	BP
GO:0060563	GO:0060563	neuroepithelial cell differentiation	2/168	75/23210	0.102707	0.482408	0.46279	Mycl/Nodal	2	BP
GO:1900182	GO:1900182	positive regulation of protein localization to nucleus	2/168	75/23210	0.102707	0.482408	0.46279	Prkcq/Ptpn22	2	BP
GO:0046034	GO:0046034	ATP metabolic process	4/168	245/23210	0.102729	0.482408	0.46279	Aldoc/Apoc3/Atpif1/Gck	4	BP
GO:0001771	GO:0001771	immunological synapse formation	1/168	15/23210	0.103271	0.482408	0.46279	Cd6	1	BP
GO:0009070	GO:0009070	serine family amino acid biosynthetic process	1/168	15/23210	0.103271	0.482408	0.46279	Phgdh	1	BP
GO:0009143	GO:0009143	nucleoside triphosphate catabolic process	1/168	15/23210	0.103271	0.482408	0.46279	Dctpp1	1	BP
GO:0010935	GO:0010935	regulation of macrophage cytokine production	1/168	15/23210	0.103271	0.482408	0.46279	Irak3	1	BP
GO:0010960	GO:0010960	magnesium ion homeostasis	1/168	15/23210	0.103271	0.482408	0.46279	Cnnm4	1	BP
GO:0015693	GO:0015693	magnesium ion transport	1/168	15/23210	0.103271	0.482408	0.46279	Cnnm4	1	BP
GO:0017014	GO:0017014	protein nitrosylation	1/168	15/23210	0.103271	0.482408	0.46279	S100a8	1	BP
GO:0030730	GO:0030730	sequestering of triglyceride	1/168	15/23210	0.103271	0.482408	0.46279	Fitm1	1	BP
GO:0031280	GO:0031280	negative regulation of cyclase activity	1/168	15/23210	0.103271	0.482408	0.46279	P2ry13	1	BP
GO:0032717	GO:0032717	negative regulation of interleukin-8 production	1/168	15/23210	0.103271	0.482408	0.46279	Ptpn22	1	BP
GO:0034162	GO:0034162	toll-like receptor 9 signaling pathway	1/168	15/23210	0.103271	0.482408	0.46279	Ptpn22	1	BP
GO:0034755	GO:0034755	iron ion transmembrane transport	1/168	15/23210	0.103271	0.482408	0.46279	Scara5	1	BP
GO:0035641	GO:0035641	locomotory exploration behavior	1/168	15/23210	0.103271	0.482408	0.46279	Nlgn2	1	BP
GO:0042953	GO:0042953	lipoprotein transport	1/168	15/23210	0.103271	0.482408	0.46279	Apoc3	1	BP
GO:0044872	GO:0044872	lipoprotein localization	1/168	15/23210	0.103271	0.482408	0.46279	Apoc3	1	BP
GO:0050872	GO:0050872	white fat cell differentiation	1/168	15/23210	0.103271	0.482408	0.46279	Wfdc21	1	BP
GO:0051004	GO:0051004	regulation of lipoprotein lipase activity	1/168	15/23210	0.103271	0.482408	0.46279	Apoc3	1	BP
GO:0051923	GO:0051923	sulfation	1/168	15/23210	0.103271	0.482408	0.46279	Sult1b1	1	BP
GO:0061051	GO:0061051	positive regulation of cell growth involved in cardiac muscle cell development	1/168	15/23210	0.103271	0.482408	0.46279	Adrb1	1	BP
GO:0086014	GO:0086014	atrial cardiac muscle cell action potential	1/168	15/23210	0.103271	0.482408	0.46279	Cacna1c	1	BP
GO:0086026	GO:0086026	atrial cardiac muscle cell to AV node cell signaling	1/168	15/23210	0.103271	0.482408	0.46279	Cacna1c	1	BP
GO:0086066	GO:0086066	atrial cardiac muscle cell to AV node cell communication	1/168	15/23210	0.103271	0.482408	0.46279	Cacna1c	1	BP
GO:0051348	GO:0051348	negative regulation of transferase activity	4/168	246/23210	0.103872	0.482408	0.46279	Ptk6/Irak3/Ptpn22/Setd7	4	BP
GO:0001913	GO:0001913	T cell mediated cytotoxicity	2/168	76/23210	0.105002	0.482408	0.46279	Gzmm/Gzmb	2	BP
GO:0019229	GO:0019229	regulation of vasoconstriction	2/168	76/23210	0.105002	0.482408	0.46279	Cacna1c/Chrm3	2	BP
GO:1901606	GO:1901606	alpha-amino acid catabolic process	2/168	76/23210	0.105002	0.482408	0.46279	Acmsd/Csad	2	BP
GO:0046631	GO:0046631	alpha-beta T cell activation	3/168	157/23210	0.105757	0.482408	0.46279	Prkcq/Ptpn22/Rasal3	3	BP
GO:0071466	GO:0071466	cellular response to xenobiotic stimulus	3/168	157/23210	0.105757	0.482408	0.46279	Sult1b1/Csad/Phgdh	3	BP
GO:0002696	GO:0002696	positive regulation of leukocyte activation	6/168	446/23210	0.105907	0.482408	0.46279	Cd6/Ighv8-8/Itgal/Prkcq/Ptpn22/Rasal3	6	BP
GO:0007601	GO:0007601	visual perception	3/168	158/23210	0.107261	0.482408	0.46279	Crygn/Gnat1/Cnnm4	3	BP
GO:0008654	GO:0008654	phospholipid biosynthetic process	3/168	158/23210	0.107261	0.482408	0.46279	Etnk2/Fitm1/Idi1	3	BP
GO:0030148	GO:0030148	sphingolipid biosynthetic process	2/168	77/23210	0.10731	0.482408	0.46279	9130409I23Rik/Elovl3	2	BP
GO:0033143	GO:0033143	regulation of intracellular steroid hormone receptor signaling pathway	2/168	77/23210	0.10731	0.482408	0.46279	Cyp7b1/Nodal	2	BP
GO:0006520	GO:0006520	cellular amino acid metabolic process	4/168	249/23210	0.107333	0.482408	0.46279	Acmsd/Dct/Csad/Phgdh	4	BP
GO:0048608	GO:0048608	reproductive structure development	6/168	449/23210	0.108423	0.482408	0.46279	Afp/Cyp7b1/Etnk2/Fst/Nodal/Nsdhl	6	BP
GO:0006644	GO:0006644	phospholipid metabolic process	5/168	348/23210	0.109113	0.482408	0.46279	Etnk2/Fitm1/Idi1/Pik3r5/Pla2g7	5	BP
GO:0005977	GO:0005977	glycogen metabolic process	2/168	78/23210	0.109632	0.482408	0.46279	Adrb1/Gck	2	BP
GO:0006073	GO:0006073	cellular glucan metabolic process	2/168	78/23210	0.109632	0.482408	0.46279	Adrb1/Gck	2	BP
GO:0010389	GO:0010389	regulation of G2/M transition of mitotic cell cycle	2/168	78/23210	0.109632	0.482408	0.46279	Prkcq/Rad51b	2	BP
GO:0044042	GO:0044042	glucan metabolic process	2/168	78/23210	0.109632	0.482408	0.46279	Adrb1/Gck	2	BP
GO:0009147	GO:0009147	pyrimidine nucleoside triphosphate metabolic process	1/168	16/23210	0.109766	0.482408	0.46279	Dctpp1	1	BP
GO:0014733	GO:0014733	regulation of skeletal muscle adaptation	1/168	16/23210	0.109766	0.482408	0.46279	Tnnc1	1	BP
GO:0016540	GO:0016540	protein autoprocessing	1/168	16/23210	0.109766	0.482408	0.46279	Ctse	1	BP
GO:0018027	GO:0018027	peptidyl-lysine dimethylation	1/168	16/23210	0.109766	0.482408	0.46279	Setd7	1	BP
GO:0030449	GO:0030449	regulation of complement activation	1/168	16/23210	0.109766	0.482408	0.46279	Susd4	1	BP
GO:0032230	GO:0032230	positive regulation of synaptic transmission, GABAergic	1/168	16/23210	0.109766	0.482408	0.46279	Nlgn2	1	BP
GO:0036315	GO:0036315	cellular response to sterol	1/168	16/23210	0.109766	0.482408	0.46279	Inhbb	1	BP
GO:0040034	GO:0040034	regulation of development, heterochronic	1/168	16/23210	0.109766	0.482408	0.46279	Nodal	1	BP
GO:0042448	GO:0042448	progesterone metabolic process	1/168	16/23210	0.109766	0.482408	0.46279	Afp	1	BP
GO:0044065	GO:0044065	regulation of respiratory system process	1/168	16/23210	0.109766	0.482408	0.46279	Nlgn2	1	BP
GO:0045947	GO:0045947	negative regulation of translational initiation	1/168	16/23210	0.109766	0.482408	0.46279	Bank1	1	BP
GO:0046835	GO:0046835	carbohydrate phosphorylation	1/168	16/23210	0.109766	0.482408	0.46279	Gck	1	BP
GO:0055057	GO:0055057	neuroblast division	1/168	16/23210	0.109766	0.482408	0.46279	Dct	1	BP
GO:0060192	GO:0060192	negative regulation of lipase activity	1/168	16/23210	0.109766	0.482408	0.46279	Apoc3	1	BP
GO:0060766	GO:0060766	negative regulation of androgen receptor signaling pathway	1/168	16/23210	0.109766	0.482408	0.46279	Nodal	1	BP
GO:0070166	GO:0070166	enamel mineralization	1/168	16/23210	0.109766	0.482408	0.46279	Cnnm4	1	BP
GO:0072529	GO:0072529	pyrimidine-containing compound catabolic process	1/168	16/23210	0.109766	0.482408	0.46279	Dctpp1	1	BP
GO:0098703	GO:0098703	calcium ion import across plasma membrane	1/168	16/23210	0.109766	0.482408	0.46279	Adrb1	1	BP
GO:0106070	GO:0106070	regulation of adenylate cyclase-activating G protein-coupled receptor signaling pathway	1/168	16/23210	0.109766	0.482408	0.46279	Adrb1	1	BP
GO:1904062	GO:1904062	regulation of cation transmembrane transport	5/168	349/23210	0.11009	0.482408	0.46279	Atp4a/Cacna1c/Adrb1/Nlgn2/Ptpn22	5	BP
GO:0006941	GO:0006941	striated muscle contraction	3/168	160/23210	0.110294	0.482408	0.46279	Cacna1c/Tnnc1/Adrb1	3	BP
GO:1903169	GO:1903169	regulation of calcium ion transmembrane transport	3/168	161/23210	0.111823	0.482408	0.46279	Cacna1c/Adrb1/Ptpn22	3	BP
GO:0061458	GO:0061458	reproductive system development	6/168	453/23210	0.111826	0.482408	0.46279	Afp/Cyp7b1/Etnk2/Fst/Nodal/Nsdhl	6	BP
GO:0045913	GO:0045913	positive regulation of carbohydrate metabolic process	2/168	79/23210	0.111967	0.482408	0.46279	Mup1/Gck	2	BP
GO:1904951	GO:1904951	positive regulation of establishment of protein localization	6/168	454/23210	0.112685	0.482408	0.46279	Adrb1/Baiap3/Gck/Nlgn2/Prkcq/Ptpn22	6	BP
GO:0007626	GO:0007626	locomotory behavior	4/168	254/23210	0.113217	0.482408	0.46279	Cacna1c/Mup1/Pitx3/Nlgn2	4	BP
GO:0010952	GO:0010952	positive regulation of peptidase activity	3/168	162/23210	0.11336	0.482408	0.46279	Diablo/Nodal/S100a8	3	BP
GO:0032635	GO:0032635	interleukin-6 production	3/168	162/23210	0.11336	0.482408	0.46279	Bank1/Irak3/Ptpn22	3	BP
GO:0050953	GO:0050953	sensory perception of light stimulus	3/168	162/23210	0.11336	0.482408	0.46279	Crygn/Gnat1/Cnnm4	3	BP
GO:0045682	GO:0045682	regulation of epidermis development	2/168	80/23210	0.114316	0.482408	0.46279	Fst/Mycl	2	BP
GO:1904427	GO:1904427	positive regulation of calcium ion transmembrane transport	2/168	80/23210	0.114316	0.482408	0.46279	Cacna1c/Adrb1	2	BP
GO:0006575	GO:0006575	cellular modified amino acid metabolic process	3/168	163/23210	0.114905	0.482408	0.46279	Nat8/Sult1b1/Dio3	3	BP
GO:0009266	GO:0009266	response to temperature stimulus	3/168	163/23210	0.114905	0.482408	0.46279	Hsbp1l1/Scara5/Adrb1	3	BP
GO:0043010	GO:0043010	camera-type eye development	5/168	354/23210	0.115038	0.482408	0.46279	Cacna1c/Crygn/Gnat1/Pitx3/Dio3	5	BP
GO:0002024	GO:0002024	diet induced thermogenesis	1/168	17/23210	0.116214	0.482408	0.46279	Adrb1	1	BP
GO:0010867	GO:0010867	positive regulation of triglyceride biosynthetic process	1/168	17/23210	0.116214	0.482408	0.46279	Apoc3	1	BP
GO:0010888	GO:0010888	negative regulation of lipid storage	1/168	17/23210	0.116214	0.482408	0.46279	Mup1	1	BP
GO:0010934	GO:0010934	macrophage cytokine production	1/168	17/23210	0.116214	0.482408	0.46279	Irak3	1	BP
GO:0030277	GO:0030277	maintenance of gastrointestinal epithelium	1/168	17/23210	0.116214	0.482408	0.46279	Tff3	1	BP
GO:0032740	GO:0032740	positive regulation of interleukin-17 production	1/168	17/23210	0.116214	0.482408	0.46279	Prkcq	1	BP
GO:0038092	GO:0038092	nodal signaling pathway	1/168	17/23210	0.116214	0.482408	0.46279	Nodal	1	BP
GO:0040015	GO:0040015	negative regulation of multicellular organism growth	1/168	17/23210	0.116214	0.482408	0.46279	Adrb1	1	BP
GO:0042074	GO:0042074	cell migration involved in gastrulation	1/168	17/23210	0.116214	0.482408	0.46279	Nodal	1	BP
GO:0045725	GO:0045725	positive regulation of glycogen biosynthetic process	1/168	17/23210	0.116214	0.482408	0.46279	Gck	1	BP
GO:0046337	GO:0046337	phosphatidylethanolamine metabolic process	1/168	17/23210	0.116214	0.482408	0.46279	Etnk2	1	BP
GO:0046549	GO:0046549	retinal cone cell development	1/168	17/23210	0.116214	0.482408	0.46279	Dio3	1	BP
GO:0048368	GO:0048368	lateral mesoderm development	1/168	17/23210	0.116214	0.482408	0.46279	Nodal	1	BP
GO:0051350	GO:0051350	negative regulation of lyase activity	1/168	17/23210	0.116214	0.482408	0.46279	P2ry13	1	BP
GO:0061179	GO:0061179	negative regulation of insulin secretion involved in cellular response to glucose stimulus	1/168	17/23210	0.116214	0.482408	0.46279	Mup1	1	BP
GO:0086012	GO:0086012	membrane depolarization during cardiac muscle cell action potential	1/168	17/23210	0.116214	0.482408	0.46279	Cacna1c	1	BP
GO:1902656	GO:1902656	calcium ion import into cytosol	1/168	17/23210	0.116214	0.482408	0.46279	Adrb1	1	BP
GO:1902713	GO:1902713	regulation of interferon-gamma secretion	1/168	17/23210	0.116214	0.482408	0.46279	Ptpn22	1	BP
GO:1904355	GO:1904355	positive regulation of telomere capping	1/168	17/23210	0.116214	0.482408	0.46279	Prkcq	1	BP
GO:2001185	GO:2001185	regulation of CD8-positive, alpha-beta T cell activation	1/168	17/23210	0.116214	0.482408	0.46279	Ptpn22	1	BP
GO:0046530	GO:0046530	photoreceptor cell differentiation	2/168	81/23210	0.116677	0.482408	0.46279	Gnat1/Dio3	2	BP
GO:0061178	GO:0061178	regulation of insulin secretion involved in cellular response to glucose stimulus	2/168	81/23210	0.116677	0.482408	0.46279	Mup1/Baiap3	2	BP
GO:0007178	GO:0007178	transmembrane receptor protein serine/threonine kinase signaling pathway	5/168	357/23210	0.118058	0.482967	0.463326	Afp/Fst/Nodal/Onecut1/Inhbb	5	BP
GO:0050867	GO:0050867	positive regulation of cell activation	6/168	461/23210	0.118794	0.482967	0.463326	Cd6/Ighv8-8/Itgal/Prkcq/Ptpn22/Rasal3	6	BP
GO:0006720	GO:0006720	isoprenoid metabolic process	2/168	82/23210	0.11905	0.482967	0.463326	Adh4/Idi1	2	BP
GO:0051899	GO:0051899	membrane depolarization	2/168	82/23210	0.11905	0.482967	0.463326	Atpif1/Cacna1c	2	BP
GO:0001818	GO:0001818	negative regulation of cytokine production	4/168	259/23210	0.119241	0.482967	0.463326	Bank1/Inhbb/Irak3/Ptpn22	4	BP
GO:0051056	GO:0051056	regulation of small GTPase mediated signal transduction	4/168	259/23210	0.119241	0.482967	0.463326	Mmd2/Tiam2/Fgd3/Rasal3	4	BP
GO:0042594	GO:0042594	response to starvation	3/168	166/23210	0.119588	0.482967	0.463326	Mup1/Gck/Inhbb	3	BP
GO:0006942	GO:0006942	regulation of striated muscle contraction	2/168	83/23210	0.121435	0.482967	0.463326	Cacna1c/Adrb1	2	BP
GO:0043242	GO:0043242	negative regulation of protein-containing complex disassembly	2/168	83/23210	0.121435	0.482967	0.463326	Irak3/Tmod4	2	BP
GO:0001710	GO:0001710	mesodermal cell fate commitment	1/168	18/23210	0.122616	0.482967	0.463326	Nodal	1	BP
GO:0001833	GO:0001833	inner cell mass cell proliferation	1/168	18/23210	0.122616	0.482967	0.463326	Dmbt1	1	BP
GO:0001991	GO:0001991	regulation of systemic arterial blood pressure by circulatory renin-angiotensin	1/168	18/23210	0.122616	0.482967	0.463326	Adrb1	1	BP
GO:0005980	GO:0005980	glycogen catabolic process	1/168	18/23210	0.122616	0.482967	0.463326	Adrb1	1	BP
GO:0009251	GO:0009251	glucan catabolic process	1/168	18/23210	0.122616	0.482967	0.463326	Adrb1	1	BP
GO:0032274	GO:0032274	gonadotropin secretion	1/168	18/23210	0.122616	0.482967	0.463326	Inhbb	1	BP
GO:0032780	GO:0032780	negative regulation of ATPase activity	1/168	18/23210	0.122616	0.482967	0.463326	Atpif1	1	BP
GO:0033604	GO:0033604	negative regulation of catecholamine secretion	1/168	18/23210	0.122616	0.482967	0.463326	Gck	1	BP
GO:0034138	GO:0034138	toll-like receptor 3 signaling pathway	1/168	18/23210	0.122616	0.482967	0.463326	Ptpn22	1	BP
GO:0042219	GO:0042219	cellular modified amino acid catabolic process	1/168	18/23210	0.122616	0.482967	0.463326	Dio3	1	BP
GO:0042447	GO:0042447	hormone catabolic process	1/168	18/23210	0.122616	0.482967	0.463326	Dio3	1	BP
GO:0042670	GO:0042670	retinal cone cell differentiation	1/168	18/23210	0.122616	0.482967	0.463326	Dio3	1	BP
GO:0043252	GO:0043252	sodium-independent organic anion transport	1/168	18/23210	0.122616	0.482967	0.463326	Slco1a1	1	BP
GO:0051156	GO:0051156	glucose 6-phosphate metabolic process	1/168	18/23210	0.122616	0.482967	0.463326	Gck	1	BP
GO:1903599	GO:1903599	positive regulation of autophagy of mitochondrion	1/168	18/23210	0.122616	0.482967	0.463326	Atpif1	1	BP
GO:0062207	GO:0062207	regulation of pattern recognition receptor signaling pathway	2/168	84/23210	0.123832	0.48393	0.464251	Irak3/Ptpn22	2	BP
GO:0001890	GO:0001890	placenta development	3/168	170/23210	0.12594	0.48393	0.464251	Etnk2/Nodal/Nsdhl	3	BP
GO:0007369	GO:0007369	gastrulation	3/168	170/23210	0.12594	0.48393	0.464251	Nat8/Nat8f5/Nodal	3	BP
GO:0002088	GO:0002088	lens development in camera-type eye	2/168	85/23210	0.126241	0.48393	0.464251	Crygn/Pitx3	2	BP
GO:0042632	GO:0042632	cholesterol homeostasis	2/168	85/23210	0.126241	0.48393	0.464251	Apoc3/Cyp7b1	2	BP
GO:0009593	GO:0009593	detection of chemical stimulus	2/168	86/23210	0.128661	0.48393	0.464251	Gnat1/Gck	2	BP
GO:0043900	GO:0043900	regulation of multi-organism process	2/168	86/23210	0.128661	0.48393	0.464251	Nodal/Inhbb	2	BP
GO:0055092	GO:0055092	sterol homeostasis	2/168	86/23210	0.128661	0.48393	0.464251	Apoc3/Cyp7b1	2	BP
GO:0002495	GO:0002495	antigen processing and presentation of peptide antigen via MHC class II	1/168	19/23210	0.128972	0.48393	0.464251	Ctse	1	BP
GO:0002643	GO:0002643	regulation of tolerance induction	1/168	19/23210	0.128972	0.48393	0.464251	Irak3	1	BP
GO:0006883	GO:0006883	cellular sodium ion homeostasis	1/168	19/23210	0.128972	0.48393	0.464251	Atp4a	1	BP
GO:0009074	GO:0009074	aromatic amino acid family catabolic process	1/168	19/23210	0.128972	0.48393	0.464251	Acmsd	1	BP
GO:0010984	GO:0010984	regulation of lipoprotein particle clearance	1/168	19/23210	0.128972	0.48393	0.464251	Apoc3	1	BP
GO:0032695	GO:0032695	negative regulation of interleukin-12 production	1/168	19/23210	0.128972	0.48393	0.464251	Irak3	1	BP
GO:0033617	GO:0033617	mitochondrial cytochrome c oxidase assembly	1/168	19/23210	0.128972	0.48393	0.464251	Pet100	1	BP
GO:0045076	GO:0045076	regulation of interleukin-2 biosynthetic process	1/168	19/23210	0.128972	0.48393	0.464251	Prkcq	1	BP
GO:0045116	GO:0045116	protein neddylation	1/168	19/23210	0.128972	0.48393	0.464251	Cops9	1	BP
GO:0048172	GO:0048172	regulation of short-term neuronal synaptic plasticity	1/168	19/23210	0.128972	0.48393	0.464251	Syn1	1	BP
GO:0050860	GO:0050860	negative regulation of T cell receptor signaling pathway	1/168	19/23210	0.128972	0.48393	0.464251	Ptpn22	1	BP
GO:0060456	GO:0060456	positive regulation of digestive system process	1/168	19/23210	0.128972	0.48393	0.464251	Adrb1	1	BP
GO:0070723	GO:0070723	response to cholesterol	1/168	19/23210	0.128972	0.48393	0.464251	Inhbb	1	BP
GO:0070875	GO:0070875	positive regulation of glycogen metabolic process	1/168	19/23210	0.128972	0.48393	0.464251	Gck	1	BP
GO:0070989	GO:0070989	oxidative demethylation	1/168	19/23210	0.128972	0.48393	0.464251	Cyp3a16	1	BP
GO:0090026	GO:0090026	positive regulation of monocyte chemotaxis	1/168	19/23210	0.128972	0.48393	0.464251	Pla2g7	1	BP
GO:1903214	GO:1903214	regulation of protein targeting to mitochondrion	1/168	19/23210	0.128972	0.48393	0.464251	Atpif1	1	BP
GO:1901654	GO:1901654	response to ketone	3/168	172/23210	0.129161	0.48393	0.464251	Hsd3b5/Mup1/Mup11	3	BP
GO:0035296	GO:0035296	regulation of tube diameter	3/168	173/23210	0.130783	0.485796	0.466041	Cacna1c/Chrm3/Adrb1	3	BP
GO:0097746	GO:0097746	regulation of blood vessel diameter	3/168	173/23210	0.130783	0.485796	0.466041	Cacna1c/Chrm3/Adrb1	3	BP
GO:0006096	GO:0006096	glycolytic process	2/168	87/23210	0.131091	0.485796	0.466041	Aldoc/Gck	2	BP
GO:0042475	GO:0042475	odontogenesis of dentin-containing tooth	2/168	87/23210	0.131091	0.485796	0.466041	Fst/Cnnm4	2	BP
GO:0035150	GO:0035150	regulation of tube size	3/168	174/23210	0.132411	0.485796	0.466041	Cacna1c/Chrm3/Adrb1	3	BP
GO:0031667	GO:0031667	response to nutrient levels	5/168	371/23210	0.132638	0.485796	0.466041	Dntt/Mup1/Adrb1/Gck/Inhbb	5	BP
GO:0006757	GO:0006757	ATP generation from ADP	2/168	88/23210	0.133532	0.485796	0.466041	Aldoc/Gck	2	BP
GO:0051492	GO:0051492	regulation of stress fiber assembly	2/168	88/23210	0.133532	0.485796	0.466041	S100a10/Prkcq	2	BP
GO:0034765	GO:0034765	regulation of ion transmembrane transport	6/168	478/23210	0.134301	0.485796	0.466041	Atp4a/Cacna1c/Adrb1/Kcnj9/Nlgn2/Ptpn22	6	BP
GO:0002504	GO:0002504	antigen processing and presentation of peptide or polysaccharide antigen via MHC class II	1/168	20/23210	0.135282	0.485796	0.466041	Ctse	1	BP
GO:0002523	GO:0002523	leukocyte migration involved in inflammatory response	1/168	20/23210	0.135282	0.485796	0.466041	S100a8	1	BP
GO:0002755	GO:0002755	MyD88-dependent toll-like receptor signaling pathway	1/168	20/23210	0.135282	0.485796	0.466041	Irak3	1	BP
GO:0006699	GO:0006699	bile acid biosynthetic process	1/168	20/23210	0.135282	0.485796	0.466041	Cyp7b1	1	BP
GO:0009200	GO:0009200	deoxyribonucleoside triphosphate metabolic process	1/168	20/23210	0.135282	0.485796	0.466041	Dctpp1	1	BP
GO:0032495	GO:0032495	response to muramyl dipeptide	1/168	20/23210	0.135282	0.485796	0.466041	Ptpn22	1	BP
GO:0034143	GO:0034143	regulation of toll-like receptor 4 signaling pathway	1/168	20/23210	0.135282	0.485796	0.466041	Ptpn22	1	BP
GO:0034377	GO:0034377	plasma lipoprotein particle assembly	1/168	20/23210	0.135282	0.485796	0.466041	Apom	1	BP
GO:0044247	GO:0044247	cellular polysaccharide catabolic process	1/168	20/23210	0.135282	0.485796	0.466041	Adrb1	1	BP
GO:0045821	GO:0045821	positive regulation of glycolytic process	1/168	20/23210	0.135282	0.485796	0.466041	Gck	1	BP
GO:0045986	GO:0045986	negative regulation of smooth muscle contraction	1/168	20/23210	0.135282	0.485796	0.466041	Adrb1	1	BP
GO:0070498	GO:0070498	interleukin-1-mediated signaling pathway	1/168	20/23210	0.135282	0.485796	0.466041	Irak3	1	BP
GO:1901028	GO:1901028	regulation of mitochondrial outer membrane permeabilization involved in apoptotic signaling pathway	1/168	20/23210	0.135282	0.485796	0.466041	Atpif1	1	BP
GO:0048592	GO:0048592	eye morphogenesis	3/168	176/23210	0.13569	0.485796	0.466041	Gnat1/Pitx3/Dio3	3	BP
GO:0007229	GO:0007229	integrin-mediated signaling pathway	2/168	89/23210	0.135984	0.485796	0.466041	Fyb2/Itgal	2	BP
GO:0035773	GO:0035773	insulin secretion involved in cellular response to glucose stimulus	2/168	89/23210	0.135984	0.485796	0.466041	Mup1/Baiap3	2	BP
GO:1900076	GO:1900076	regulation of cellular response to insulin stimulus	2/168	89/23210	0.135984	0.485796	0.466041	Serpina12/Prkcq	2	BP
GO:0009063	GO:0009063	cellular amino acid catabolic process	2/168	90/23210	0.138446	0.488199	0.468346	Acmsd/Csad	2	BP
GO:0040014	GO:0040014	regulation of multicellular organism growth	2/168	90/23210	0.138446	0.488199	0.468346	Adrb1/Dio3	2	BP
GO:0046888	GO:0046888	negative regulation of hormone secretion	2/168	90/23210	0.138446	0.488199	0.468346	Mup1/Inhbb	2	BP
GO:1903524	GO:1903524	positive regulation of blood circulation	2/168	90/23210	0.138446	0.488199	0.468346	Chrm3/Adrb1	2	BP
GO:0001659	GO:0001659	temperature homeostasis	3/168	179/23210	0.140661	0.488199	0.468346	Elovl3/Mup1/Adrb1	3	BP
GO:0002832	GO:0002832	negative regulation of response to biotic stimulus	2/168	91/23210	0.140917	0.488199	0.468346	Susd4/Irak3	2	BP
GO:0006541	GO:0006541	glutamine metabolic process	1/168	21/23210	0.141546	0.488199	0.468346	Phgdh	1	BP
GO:0031579	GO:0031579	membrane raft organization	1/168	21/23210	0.141546	0.488199	0.468346	S100a10	1	BP
GO:0042094	GO:0042094	interleukin-2 biosynthetic process	1/168	21/23210	0.141546	0.488199	0.468346	Prkcq	1	BP
GO:0042438	GO:0042438	melanin biosynthetic process	1/168	21/23210	0.141546	0.488199	0.468346	Dct	1	BP
GO:0044273	GO:0044273	sulfur compound catabolic process	1/168	21/23210	0.141546	0.488199	0.468346	Csad	1	BP
GO:0045475	GO:0045475	locomotor rhythm	1/168	21/23210	0.141546	0.488199	0.468346	Mup1	1	BP
GO:0050908	GO:0050908	detection of light stimulus involved in visual perception	1/168	21/23210	0.141546	0.488199	0.468346	Gnat1	1	BP
GO:0050962	GO:0050962	detection of light stimulus involved in sensory perception	1/168	21/23210	0.141546	0.488199	0.468346	Gnat1	1	BP
GO:0051220	GO:0051220	cytoplasmic sequestering of protein	1/168	21/23210	0.141546	0.488199	0.468346	Cops9	1	BP
GO:0090330	GO:0090330	regulation of platelet aggregation	1/168	21/23210	0.141546	0.488199	0.468346	Prkcq	1	BP
GO:0097107	GO:0097107	postsynaptic density assembly	1/168	21/23210	0.141546	0.488199	0.468346	Nlgn2	1	BP
GO:0098780	GO:0098780	response to mitochondrial depolarisation	1/168	21/23210	0.141546	0.488199	0.468346	Atpif1	1	BP
GO:1900017	GO:1900017	positive regulation of cytokine production involved in inflammatory response	1/168	21/23210	0.141546	0.488199	0.468346	Cd6	1	BP
GO:2000482	GO:2000482	regulation of interleukin-8 secretion	1/168	21/23210	0.141546	0.488199	0.468346	Ptpn22	1	BP
GO:0060998	GO:0060998	regulation of dendritic spine development	2/168	92/23210	0.143398	0.490994	0.471027	D16Ertd472e/Nlgn2	2	BP
GO:0051186	GO:0051186	cofactor metabolic process	5/168	382/23210	0.144637	0.490994	0.471027	Acnat2/Adh4/Alas1/Atpif1/Nat8	5	BP
GO:0072521	GO:0072521	purine-containing compound metabolic process	5/168	382/23210	0.144637	0.490994	0.471027	Acnat2/Aldoc/Sult1b1/Urad/Gck	5	BP
GO:0002027	GO:0002027	regulation of heart rate	2/168	93/23210	0.145888	0.490994	0.471027	Cacna1c/Adrb1	2	BP
GO:0042110	GO:0042110	T cell activation	6/168	491/23210	0.146778	0.490994	0.471027	Apbb1ip/Cd6/Itgal/Prkcq/Ptpn22/Rasal3	6	BP
GO:0046394	GO:0046394	carboxylic acid biosynthetic process	4/168	281/23210	0.147315	0.490994	0.471027	Acmsd/Cyp7b1/Elovl3/Phgdh	4	BP
GO:0051262	GO:0051262	protein tetramerization	3/168	183/23210	0.147382	0.490994	0.471027	Aldoc/Dctpp1/S100a10	3	BP
GO:2001235	GO:2001235	positive regulation of apoptotic signaling pathway	3/168	183/23210	0.147382	0.490994	0.471027	Atpif1/S100a8/Inhbb	3	BP
GO:0055086	GO:0055086	nucleobase-containing small molecule metabolic process	6/168	492/23210	0.14776	0.490994	0.471027	Acnat2/Aldoc/Dctpp1/Sult1b1/Urad/Gck	6	BP
GO:0003084	GO:0003084	positive regulation of systemic arterial blood pressure	1/168	22/23210	0.147765	0.490994	0.471027	Adrb1	1	BP
GO:0003094	GO:0003094	glomerular filtration	1/168	22/23210	0.147765	0.490994	0.471027	Jchain	1	BP
GO:0007141	GO:0007141	male meiosis I	1/168	22/23210	0.147765	0.490994	0.471027	Brdt	1	BP
GO:0008535	GO:0008535	respiratory chain complex IV assembly	1/168	22/23210	0.147765	0.490994	0.471027	Pet100	1	BP
GO:0010884	GO:0010884	positive regulation of lipid storage	1/168	22/23210	0.147765	0.490994	0.471027	Fitm1	1	BP
GO:0030252	GO:0030252	growth hormone secretion	1/168	22/23210	0.147765	0.490994	0.471027	Cacna1c	1	BP
GO:0035268	GO:0035268	protein mannosylation	1/168	22/23210	0.147765	0.490994	0.471027	Dpy19l3	1	BP
GO:0036314	GO:0036314	response to sterol	1/168	22/23210	0.147765	0.490994	0.471027	Inhbb	1	BP
GO:0046628	GO:0046628	positive regulation of insulin receptor signaling pathway	1/168	22/23210	0.147765	0.490994	0.471027	Serpina12	1	BP
GO:0051602	GO:0051602	response to electrical stimulus	1/168	22/23210	0.147765	0.490994	0.471027	Gnat1	1	BP
GO:0051797	GO:0051797	regulation of hair follicle development	1/168	22/23210	0.147765	0.490994	0.471027	Fst	1	BP
GO:0060575	GO:0060575	intestinal epithelial cell differentiation	1/168	22/23210	0.147765	0.490994	0.471027	Ptk6	1	BP
GO:1902914	GO:1902914	regulation of protein polyubiquitination	1/168	22/23210	0.147765	0.490994	0.471027	Ptpn22	1	BP
GO:0046031	GO:0046031	ADP metabolic process	2/168	94/23210	0.148387	0.491425	0.471441	Aldoc/Gck	2	BP
GO:1902749	GO:1902749	regulation of cell cycle G2/M phase transition	2/168	94/23210	0.148387	0.491425	0.471441	Prkcq/Rad51b	2	BP
GO:0071496	GO:0071496	cellular response to external stimulus	4/168	285/23210	0.152676	0.493371	0.473307	Dctpp1/Mup1/Gck/Inhbb	4	BP
GO:0099565	GO:0099565	chemical synaptic transmission, postsynaptic	2/168	96/23210	0.153412	0.493371	0.473307	Adrb1/Nlgn2	2	BP
GO:0120162	GO:0120162	positive regulation of cold-induced thermogenesis	2/168	96/23210	0.153412	0.493371	0.473307	Elovl3/Adrb1	2	BP
GO:0000272	GO:0000272	polysaccharide catabolic process	1/168	23/23210	0.15394	0.493371	0.473307	Adrb1	1	BP
GO:0002719	GO:0002719	negative regulation of cytokine production involved in immune response	1/168	23/23210	0.15394	0.493371	0.473307	Irak3	1	BP
GO:0006144	GO:0006144	purine nucleobase metabolic process	1/168	23/23210	0.15394	0.493371	0.473307	Urad	1	BP
GO:0006582	GO:0006582	melanin metabolic process	1/168	23/23210	0.15394	0.493371	0.473307	Dct	1	BP
GO:0015721	GO:0015721	bile acid and bile salt transport	1/168	23/23210	0.15394	0.493371	0.473307	Slco1a1	1	BP
GO:0032461	GO:0032461	positive regulation of protein oligomerization	1/168	23/23210	0.15394	0.493371	0.473307	Jchain	1	BP
GO:0032727	GO:0032727	positive regulation of interferon-alpha production	1/168	23/23210	0.15394	0.493371	0.473307	Ptpn22	1	BP
GO:0034383	GO:0034383	low-density lipoprotein particle clearance	1/168	23/23210	0.15394	0.493371	0.473307	Apoc3	1	BP
GO:0043501	GO:0043501	skeletal muscle adaptation	1/168	23/23210	0.15394	0.493371	0.473307	Tnnc1	1	BP
GO:0043576	GO:0043576	regulation of respiratory gaseous exchange	1/168	23/23210	0.15394	0.493371	0.473307	Nlgn2	1	BP
GO:0048333	GO:0048333	mesodermal cell differentiation	1/168	23/23210	0.15394	0.493371	0.473307	Nodal	1	BP
GO:0060390	GO:0060390	regulation of SMAD protein signal transduction	1/168	23/23210	0.15394	0.493371	0.473307	Nodal	1	BP
GO:0072525	GO:0072525	pyridine-containing compound biosynthetic process	1/168	23/23210	0.15394	0.493371	0.473307	Acmsd	1	BP
GO:0097205	GO:0097205	renal filtration	1/168	23/23210	0.15394	0.493371	0.473307	Jchain	1	BP
GO:0097502	GO:0097502	mannosylation	1/168	23/23210	0.15394	0.493371	0.473307	Dpy19l3	1	BP
GO:2000316	GO:2000316	regulation of T-helper 17 type immune response	1/168	23/23210	0.15394	0.493371	0.473307	Prkcq	1	BP
GO:0016051	GO:0016051	carbohydrate biosynthetic process	3/168	187/23210	0.154206	0.493371	0.473307	Mup1/Serpina12/Gck	3	BP
GO:0043502	GO:0043502	regulation of muscle adaptation	2/168	97/23210	0.155936	0.493371	0.473307	Tnnc1/Adrb1	2	BP
GO:0071482	GO:0071482	cellular response to light stimulus	2/168	98/23210	0.158469	0.493371	0.473307	Cops9/Gnat1	2	BP
GO:0051346	GO:0051346	negative regulation of hydrolase activity	5/168	395/23210	0.159398	0.493371	0.473307	Apoc3/Atpif1/Itih5/Serpina12/Serpina1e	5	BP
GO:0001829	GO:0001829	trophectodermal cell differentiation	1/168	24/23210	0.16007	0.493371	0.473307	Nodal	1	BP
GO:0032753	GO:0032753	positive regulation of interleukin-4 production	1/168	24/23210	0.16007	0.493371	0.473307	Prkcq	1	BP
GO:0034505	GO:0034505	tooth mineralization	1/168	24/23210	0.16007	0.493371	0.473307	Cnnm4	1	BP
GO:0042572	GO:0042572	retinol metabolic process	1/168	24/23210	0.16007	0.493371	0.473307	Adh4	1	BP
GO:0050995	GO:0050995	negative regulation of lipid catabolic process	1/168	24/23210	0.16007	0.493371	0.473307	Apoc3	1	BP
GO:0051882	GO:0051882	mitochondrial depolarization	1/168	24/23210	0.16007	0.493371	0.473307	Atpif1	1	BP
GO:0065005	GO:0065005	protein-lipid complex assembly	1/168	24/23210	0.16007	0.493371	0.473307	Apom	1	BP
GO:0070584	GO:0070584	mitochondrion morphogenesis	1/168	24/23210	0.16007	0.493371	0.473307	Mup1	1	BP
GO:0072643	GO:0072643	interferon-gamma secretion	1/168	24/23210	0.16007	0.493371	0.473307	Ptpn22	1	BP
GO:0097186	GO:0097186	amelogenesis	1/168	24/23210	0.16007	0.493371	0.473307	Cnnm4	1	BP
GO:0009135	GO:0009135	purine nucleoside diphosphate metabolic process	2/168	99/23210	0.161009	0.493371	0.473307	Aldoc/Gck	2	BP
GO:0009179	GO:0009179	purine ribonucleoside diphosphate metabolic process	2/168	99/23210	0.161009	0.493371	0.473307	Aldoc/Gck	2	BP
GO:0033865	GO:0033865	nucleoside bisphosphate metabolic process	2/168	99/23210	0.161009	0.493371	0.473307	Acnat2/Sult1b1	2	BP
GO:0033875	GO:0033875	ribonucleoside bisphosphate metabolic process	2/168	99/23210	0.161009	0.493371	0.473307	Acnat2/Sult1b1	2	BP
GO:0034032	GO:0034032	purine nucleoside bisphosphate metabolic process	2/168	99/23210	0.161009	0.493371	0.473307	Acnat2/Sult1b1	2	BP
GO:0003012	GO:0003012	muscle system process	5/168	397/23210	0.161723	0.493371	0.473307	Cacna1c/Chrm3/Tnnc1/Adrb1/Tmod4	5	BP
GO:0006165	GO:0006165	nucleoside diphosphate phosphorylation	2/168	100/23210	0.163557	0.493371	0.473307	Aldoc/Gck	2	BP
GO:0030593	GO:0030593	neutrophil chemotaxis	2/168	100/23210	0.163557	0.493371	0.473307	S100a8/Csf3r	2	BP
GO:0110020	GO:0110020	regulation of actomyosin structure organization	2/168	100/23210	0.163557	0.493371	0.473307	S100a10/Prkcq	2	BP
GO:0051402	GO:0051402	neuron apoptotic process	4/168	293/23210	0.163616	0.493371	0.473307	Diablo/Mt1/Pitx3/Dio3	4	BP
GO:0009895	GO:0009895	negative regulation of catabolic process	4/168	294/23210	0.165004	0.493371	0.473307	Apoc3/Cyp51/Irak3/Ptpn22	4	BP
GO:0042310	GO:0042310	vasoconstriction	2/168	101/23210	0.166112	0.493371	0.473307	Cacna1c/Chrm3	2	BP
GO:0000002	GO:0000002	mitochondrial genome maintenance	1/168	25/23210	0.166156	0.493371	0.473307	Gimap3	1	BP
GO:0001956	GO:0001956	positive regulation of neurotransmitter secretion	1/168	25/23210	0.166156	0.493371	0.473307	Baiap3	1	BP
GO:0002478	GO:0002478	antigen processing and presentation of exogenous peptide antigen	1/168	25/23210	0.166156	0.493371	0.473307	Ctse	1	BP
GO:0010575	GO:0010575	positive regulation of vascular endothelial growth factor production	1/168	25/23210	0.166156	0.493371	0.473307	Nodal	1	BP
GO:0010669	GO:0010669	epithelial structure maintenance	1/168	25/23210	0.166156	0.493371	0.473307	Tff3	1	BP
GO:0021895	GO:0021895	cerebral cortex neuron differentiation	1/168	25/23210	0.166156	0.493371	0.473307	D16Ertd472e	1	BP
GO:0034123	GO:0034123	positive regulation of toll-like receptor signaling pathway	1/168	25/23210	0.166156	0.493371	0.473307	Ptpn22	1	BP
GO:0042430	GO:0042430	indole-containing compound metabolic process	1/168	25/23210	0.166156	0.493371	0.473307	Acmsd	1	BP
GO:0043567	GO:0043567	regulation of insulin-like growth factor receptor signaling pathway	1/168	25/23210	0.166156	0.493371	0.473307	Igfbp1	1	BP
GO:0051894	GO:0051894	positive regulation of focal adhesion assembly	1/168	25/23210	0.166156	0.493371	0.473307	S100a10	1	BP
GO:0071677	GO:0071677	positive regulation of mononuclear cell migration	1/168	25/23210	0.166156	0.493371	0.473307	Pla2g7	1	BP
GO:0072606	GO:0072606	interleukin-8 secretion	1/168	25/23210	0.166156	0.493371	0.473307	Ptpn22	1	BP
GO:0086019	GO:0086019	cell-cell signaling involved in cardiac conduction	1/168	25/23210	0.166156	0.493371	0.473307	Cacna1c	1	BP
GO:0090280	GO:0090280	positive regulation of calcium ion import	1/168	25/23210	0.166156	0.493371	0.473307	Adrb1	1	BP
GO:0095500	GO:0095500	acetylcholine receptor signaling pathway	1/168	25/23210	0.166156	0.493371	0.473307	Chrm3	1	BP
GO:1903747	GO:1903747	regulation of establishment of protein localization to mitochondrion	1/168	25/23210	0.166156	0.493371	0.473307	Atpif1	1	BP
GO:0006469	GO:0006469	negative regulation of protein kinase activity	3/168	194/23210	0.166381	0.493371	0.473307	Ptk6/Irak3/Ptpn22	3	BP
GO:0031669	GO:0031669	cellular response to nutrient levels	3/168	194/23210	0.166381	0.493371	0.473307	Mup1/Gck/Inhbb	3	BP
GO:0007266	GO:0007266	Rho protein signal transduction	3/168	195/23210	0.168143	0.493371	0.473307	Tiam2/Adrb1/Fgd3	3	BP
GO:0046939	GO:0046939	nucleotide phosphorylation	2/168	102/23210	0.168674	0.493371	0.473307	Aldoc/Gck	2	BP
GO:0050886	GO:0050886	endocrine process	2/168	102/23210	0.168674	0.493371	0.473307	Adrb1/Inhbb	2	BP
GO:0002224	GO:0002224	toll-like receptor signaling pathway	2/168	103/23210	0.171243	0.493371	0.473307	Irak3/Ptpn22	2	BP
GO:0009185	GO:0009185	ribonucleoside diphosphate metabolic process	2/168	103/23210	0.171243	0.493371	0.473307	Aldoc/Gck	2	BP
GO:0009408	GO:0009408	response to heat	2/168	103/23210	0.171243	0.493371	0.473307	Hsbp1l1/Scara5	2	BP
GO:0030038	GO:0030038	contractile actin filament bundle assembly	2/168	103/23210	0.171243	0.493371	0.473307	S100a10/Prkcq	2	BP
GO:0030518	GO:0030518	intracellular steroid hormone receptor signaling pathway	2/168	103/23210	0.171243	0.493371	0.473307	Cyp7b1/Nodal	2	BP
GO:0032231	GO:0032231	regulation of actin filament bundle assembly	2/168	103/23210	0.171243	0.493371	0.473307	S100a10/Prkcq	2	BP
GO:0043149	GO:0043149	stress fiber assembly	2/168	103/23210	0.171243	0.493371	0.473307	S100a10/Prkcq	2	BP
GO:0051289	GO:0051289	protein homotetramerization	2/168	103/23210	0.171243	0.493371	0.473307	Aldoc/Dctpp1	2	BP
GO:0006730	GO:0006730	one-carbon metabolic process	1/168	26/23210	0.172198	0.493371	0.473307	Car1	1	BP
GO:0010155	GO:0010155	regulation of proton transport	1/168	26/23210	0.172198	0.493371	0.473307	Atp4a	1	BP
GO:0019433	GO:0019433	triglyceride catabolic process	1/168	26/23210	0.172198	0.493371	0.473307	Apoc3	1	BP
GO:0035809	GO:0035809	regulation of urine volume	1/168	26/23210	0.172198	0.493371	0.473307	Adrb1	1	BP
GO:0045109	GO:0045109	intermediate filament organization	1/168	26/23210	0.172198	0.493371	0.473307	Tchh	1	BP
GO:0050858	GO:0050858	negative regulation of antigen receptor-mediated signaling pathway	1/168	26/23210	0.172198	0.493371	0.473307	Ptpn22	1	BP
GO:0051570	GO:0051570	regulation of histone H3-K9 methylation	1/168	26/23210	0.172198	0.493371	0.473307	Setd7	1	BP
GO:0060716	GO:0060716	labyrinthine layer blood vessel development	1/168	26/23210	0.172198	0.493371	0.473307	Nsdhl	1	BP
GO:0060765	GO:0060765	regulation of androgen receptor signaling pathway	1/168	26/23210	0.172198	0.493371	0.473307	Nodal	1	BP
GO:0061436	GO:0061436	establishment of skin barrier	1/168	26/23210	0.172198	0.493371	0.473307	Cela2a	1	BP
GO:0070233	GO:0070233	negative regulation of T cell apoptotic process	1/168	26/23210	0.172198	0.493371	0.473307	Prkcq	1	BP
GO:0090025	GO:0090025	regulation of monocyte chemotaxis	1/168	26/23210	0.172198	0.493371	0.473307	Pla2g7	1	BP
GO:0090208	GO:0090208	positive regulation of triglyceride metabolic process	1/168	26/23210	0.172198	0.493371	0.473307	Apoc3	1	BP
GO:0098901	GO:0098901	regulation of cardiac muscle cell action potential	1/168	26/23210	0.172198	0.493371	0.473307	Cacna1c	1	BP
GO:0150117	GO:0150117	positive regulation of cell-substrate junction organization	1/168	26/23210	0.172198	0.493371	0.473307	S100a10	1	BP
GO:1900078	GO:1900078	positive regulation of cellular response to insulin stimulus	1/168	26/23210	0.172198	0.493371	0.473307	Serpina12	1	BP
GO:1900273	GO:1900273	positive regulation of long-term synaptic potentiation	1/168	26/23210	0.172198	0.493371	0.473307	Adrb1	1	BP
GO:1903579	GO:1903579	negative regulation of ATP metabolic process	1/168	26/23210	0.172198	0.493371	0.473307	Apoc3	1	BP
GO:1904353	GO:1904353	regulation of telomere capping	1/168	26/23210	0.172198	0.493371	0.473307	Prkcq	1	BP
GO:2000311	GO:2000311	regulation of AMPA receptor activity	1/168	26/23210	0.172198	0.493371	0.473307	Nlgn2	1	BP
GO:0030522	GO:0030522	intracellular receptor signaling pathway	3/168	198/23210	0.173462	0.495625	0.47547	Cyp7b1/Nodal/Ptpn22	3	BP
GO:0044264	GO:0044264	cellular polysaccharide metabolic process	2/168	104/23210	0.173818	0.495625	0.47547	Adrb1/Gck	2	BP
GO:0008217	GO:0008217	regulation of blood pressure	3/168	200/23210	0.177035	0.495625	0.47547	Cacna1c/Adrb1/Klk1	3	BP
GO:0002052	GO:0002052	positive regulation of neuroblast proliferation	1/168	27/23210	0.178197	0.495625	0.47547	Dct	1	BP
GO:0003071	GO:0003071	renal system process involved in regulation of systemic arterial blood pressure	1/168	27/23210	0.178197	0.495625	0.47547	Adrb1	1	BP
GO:0003085	GO:0003085	negative regulation of systemic arterial blood pressure	1/168	27/23210	0.178197	0.495625	0.47547	Adrb1	1	BP
GO:0009394	GO:0009394	2'-deoxyribonucleotide metabolic process	1/168	27/23210	0.178197	0.495625	0.47547	Dctpp1	1	BP
GO:0010460	GO:0010460	positive regulation of heart rate	1/168	27/23210	0.178197	0.495625	0.47547	Adrb1	1	BP
GO:0010971	GO:0010971	positive regulation of G2/M transition of mitotic cell cycle	1/168	27/23210	0.178197	0.495625	0.47547	Rad51b	1	BP
GO:0014829	GO:0014829	vascular smooth muscle contraction	1/168	27/23210	0.178197	0.495625	0.47547	Chrm3	1	BP
GO:0019692	GO:0019692	deoxyribose phosphate metabolic process	1/168	27/23210	0.178197	0.495625	0.47547	Dctpp1	1	BP
GO:0030212	GO:0030212	hyaluronan metabolic process	1/168	27/23210	0.178197	0.495625	0.47547	Itih5	1	BP
GO:0031365	GO:0031365	N-terminal protein amino acid modification	1/168	27/23210	0.178197	0.495625	0.47547	Ntmt1	1	BP
GO:0035987	GO:0035987	endodermal cell differentiation	1/168	27/23210	0.178197	0.495625	0.47547	Nodal	1	BP
GO:0036037	GO:0036037	CD8-positive, alpha-beta T cell activation	1/168	27/23210	0.178197	0.495625	0.47547	Ptpn22	1	BP
GO:0044550	GO:0044550	secondary metabolite biosynthetic process	1/168	27/23210	0.178197	0.495625	0.47547	Dct	1	BP
GO:0045730	GO:0045730	respiratory burst	1/168	27/23210	0.178197	0.495625	0.47547	Jchain	1	BP
GO:0061099	GO:0061099	negative regulation of protein tyrosine kinase activity	1/168	27/23210	0.178197	0.495625	0.47547	Ptk6	1	BP
GO:1905144	GO:1905144	response to acetylcholine	1/168	27/23210	0.178197	0.495625	0.47547	Chrm3	1	BP
GO:1905145	GO:1905145	cellular response to acetylcholine	1/168	27/23210	0.178197	0.495625	0.47547	Chrm3	1	BP
GO:2000727	GO:2000727	positive regulation of cardiac muscle cell differentiation	1/168	27/23210	0.178197	0.495625	0.47547	Adrb1	1	BP
GO:0043281	GO:0043281	regulation of cysteine-type endopeptidase activity involved in apoptotic process	3/168	201/23210	0.178829	0.496443	0.476254	Diablo/Nodal/S100a8	3	BP
GO:0016999	GO:0016999	antibiotic metabolic process	2/168	106/23210	0.178988	0.496443	0.476254	Adh4/Sult1b1	2	BP
GO:0097756	GO:0097756	negative regulation of blood vessel diameter	2/168	107/23210	0.181582	0.49822	0.47796	Cacna1c/Chrm3	2	BP
GO:0007265	GO:0007265	Ras protein signal transduction	5/168	414/23210	0.182019	0.49822	0.47796	Mmd2/Tiam2/Adrb1/Fgd3/Rasal3	5	BP
GO:0002089	GO:0002089	lens morphogenesis in camera-type eye	1/168	28/23210	0.184152	0.49822	0.47796	Pitx3	1	BP
GO:0002507	GO:0002507	tolerance induction	1/168	28/23210	0.184152	0.49822	0.47796	Irak3	1	BP
GO:0005979	GO:0005979	regulation of glycogen biosynthetic process	1/168	28/23210	0.184152	0.49822	0.47796	Gck	1	BP
GO:0010962	GO:0010962	regulation of glucan biosynthetic process	1/168	28/23210	0.184152	0.49822	0.47796	Gck	1	BP
GO:0032647	GO:0032647	regulation of interferon-alpha production	1/168	28/23210	0.184152	0.49822	0.47796	Ptpn22	1	BP
GO:0033198	GO:0033198	response to ATP	1/168	28/23210	0.184152	0.49822	0.47796	Dntt	1	BP
GO:0061050	GO:0061050	regulation of cell growth involved in cardiac muscle cell development	1/168	28/23210	0.184152	0.49822	0.47796	Adrb1	1	BP
GO:0086005	GO:0086005	ventricular cardiac muscle cell action potential	1/168	28/23210	0.184152	0.49822	0.47796	Cacna1c	1	BP
GO:0098698	GO:0098698	postsynaptic specialization assembly	1/168	28/23210	0.184152	0.49822	0.47796	Nlgn2	1	BP
GO:1904861	GO:1904861	excitatory synapse assembly	1/168	28/23210	0.184152	0.49822	0.47796	Nlgn2	1	BP
GO:0002526	GO:0002526	acute inflammatory response	2/168	108/23210	0.184181	0.49822	0.47796	Orm1/Cd6	2	BP
GO:1900006	GO:1900006	positive regulation of dendrite development	2/168	108/23210	0.184181	0.49822	0.47796	D16Ertd472e/Nlgn2	2	BP
GO:0007160	GO:0007160	cell-matrix adhesion	3/168	204/23210	0.184241	0.49822	0.47796	Onecut1/S100a10/Itgal	3	BP
GO:0031032	GO:0031032	actomyosin structure organization	3/168	204/23210	0.184241	0.49822	0.47796	S100a10/Prkcq/Tmod4	3	BP
GO:0008344	GO:0008344	adult locomotory behavior	2/168	109/23210	0.186786	0.49822	0.47796	Cacna1c/Nlgn2	2	BP
GO:0042035	GO:0042035	regulation of cytokine biosynthetic process	2/168	109/23210	0.186786	0.49822	0.47796	Inhbb/Prkcq	2	BP
GO:0009117	GO:0009117	nucleotide metabolic process	5/168	418/23210	0.186929	0.49822	0.47796	Acnat2/Aldoc/Dctpp1/Sult1b1/Gck	5	BP
GO:0051235	GO:0051235	maintenance of location	4/168	310/23210	0.187756	0.49822	0.47796	Cops9/Fitm1/Mup1/Sqle	4	BP
GO:0003018	GO:0003018	vascular process in circulatory system	3/168	206/23210	0.187873	0.49822	0.47796	Cacna1c/Chrm3/Adrb1	3	BP
GO:0044282	GO:0044282	small molecule catabolic process	4/168	311/23210	0.189211	0.49822	0.47796	Acmsd/Adh4/Sult1b1/Csad	4	BP
GO:0000086	GO:0000086	G2/M transition of mitotic cell cycle	2/168	110/23210	0.189396	0.49822	0.47796	Prkcq/Rad51b	2	BP
GO:0043401	GO:0043401	steroid hormone mediated signaling pathway	2/168	110/23210	0.189396	0.49822	0.47796	Cyp7b1/Nodal	2	BP
GO:0090100	GO:0090100	positive regulation of transmembrane receptor protein serine/threonine kinase signaling pathway	2/168	110/23210	0.189396	0.49822	0.47796	Nodal/Inhbb	2	BP
GO:1901890	GO:1901890	positive regulation of cell junction assembly	2/168	110/23210	0.189396	0.49822	0.47796	S100a10/Nlgn2	2	BP
GO:0097529	GO:0097529	myeloid leukocyte migration	3/168	207/23210	0.189696	0.49822	0.47796	S100a8/Csf3r/Pla2g7	3	BP
GO:0002230	GO:0002230	positive regulation of defense response to virus by host	1/168	29/23210	0.190064	0.49822	0.47796	Ptpn22	1	BP
GO:0006270	GO:0006270	DNA replication initiation	1/168	29/23210	0.190064	0.49822	0.47796	Mcm10	1	BP
GO:0007602	GO:0007602	phototransduction	1/168	29/23210	0.190064	0.49822	0.47796	Gnat1	1	BP
GO:0008206	GO:0008206	bile acid metabolic process	1/168	29/23210	0.190064	0.49822	0.47796	Cyp7b1	1	BP
GO:0033141	GO:0033141	positive regulation of peptidyl-serine phosphorylation of STAT protein	1/168	29/23210	0.190064	0.49822	0.47796	Gfra2	1	BP
GO:0060571	GO:0060571	morphogenesis of an epithelial fold	1/168	29/23210	0.190064	0.49822	0.47796	Nodal	1	BP
GO:0071880	GO:0071880	adenylate cyclase-activating adrenergic receptor signaling pathway	1/168	29/23210	0.190064	0.49822	0.47796	Adrb1	1	BP
GO:0090181	GO:0090181	regulation of cholesterol metabolic process	1/168	29/23210	0.190064	0.49822	0.47796	Serpina12	1	BP
GO:0097345	GO:0097345	mitochondrial outer membrane permeabilization	1/168	29/23210	0.190064	0.49822	0.47796	Atpif1	1	BP
GO:0001942	GO:0001942	hair follicle development	2/168	111/23210	0.192011	0.49822	0.47796	Fst/Nsdhl	2	BP
GO:0021782	GO:0021782	glial cell development	2/168	111/23210	0.192011	0.49822	0.47796	S100a8/Phgdh	2	BP
GO:0071901	GO:0071901	negative regulation of protein serine/threonine kinase activity	2/168	111/23210	0.192011	0.49822	0.47796	Irak3/Ptpn22	2	BP
GO:0001892	GO:0001892	embryonic placenta development	2/168	112/23210	0.194631	0.49822	0.47796	Nodal/Nsdhl	2	BP
GO:0007589	GO:0007589	body fluid secretion	2/168	112/23210	0.194631	0.49822	0.47796	Chrm3/Adrb1	2	BP
GO:0046822	GO:0046822	regulation of nucleocytoplasmic transport	2/168	112/23210	0.194631	0.49822	0.47796	Prkcq/Ptpn22	2	BP
GO:0060078	GO:0060078	regulation of postsynaptic membrane potential	2/168	112/23210	0.194631	0.49822	0.47796	Adrb1/Nlgn2	2	BP
GO:0000038	GO:0000038	very long-chain fatty acid metabolic process	1/168	30/23210	0.195934	0.49822	0.47796	Elovl3	1	BP
GO:0002438	GO:0002438	acute inflammatory response to antigenic stimulus	1/168	30/23210	0.195934	0.49822	0.47796	Cd6	1	BP
GO:0032607	GO:0032607	interferon-alpha production	1/168	30/23210	0.195934	0.49822	0.47796	Ptpn22	1	BP
GO:0032673	GO:0032673	regulation of interleukin-4 production	1/168	30/23210	0.195934	0.49822	0.47796	Prkcq	1	BP
GO:0034110	GO:0034110	regulation of homotypic cell-cell adhesion	1/168	30/23210	0.195934	0.49822	0.47796	Prkcq	1	BP
GO:0035640	GO:0035640	exploration behavior	1/168	30/23210	0.195934	0.49822	0.47796	Nlgn2	1	BP
GO:0060143	GO:0060143	positive regulation of syncytium formation by plasma membrane fusion	1/168	30/23210	0.195934	0.49822	0.47796	Ocstamp	1	BP
GO:0061082	GO:0061082	myeloid leukocyte cytokine production	1/168	30/23210	0.195934	0.49822	0.47796	Irak3	1	BP
GO:0070306	GO:0070306	lens fiber cell differentiation	1/168	30/23210	0.195934	0.49822	0.47796	Pitx3	1	BP
GO:0072524	GO:0072524	pyridine-containing compound metabolic process	1/168	30/23210	0.195934	0.49822	0.47796	Acmsd	1	BP
GO:1902751	GO:1902751	positive regulation of cell cycle G2/M phase transition	1/168	30/23210	0.195934	0.49822	0.47796	Rad51b	1	BP
GO:0001952	GO:0001952	regulation of cell-matrix adhesion	2/168	113/23210	0.197255	0.49822	0.47796	Onecut1/S100a10	2	BP
GO:0002286	GO:0002286	T cell activation involved in immune response	2/168	113/23210	0.197255	0.49822	0.47796	Apbb1ip/Itgal	2	BP
GO:0008585	GO:0008585	female gonad development	2/168	113/23210	0.197255	0.49822	0.47796	Afp/Fst	2	BP
GO:0090101	GO:0090101	negative regulation of transmembrane receptor protein serine/threonine kinase signaling pathway	2/168	113/23210	0.197255	0.49822	0.47796	Fst/Onecut1	2	BP
GO:0098773	GO:0098773	skin epidermis development	2/168	113/23210	0.197255	0.49822	0.47796	Fst/Nsdhl	2	BP
GO:2000177	GO:2000177	regulation of neural precursor cell proliferation	2/168	113/23210	0.197255	0.49822	0.47796	Dct/Pitx3	2	BP
GO:0035264	GO:0035264	multicellular organism growth	3/168	212/23210	0.198878	0.49822	0.47796	Etnk2/Adrb1/Dio3	3	BP
GO:0006753	GO:0006753	nucleoside phosphate metabolic process	5/168	428/23210	0.19941	0.49822	0.47796	Acnat2/Aldoc/Dctpp1/Sult1b1/Gck	5	BP
GO:0042742	GO:0042742	defense response to bacterium	5/168	428/23210	0.19941	0.49822	0.47796	Leap2/Dmbt1/Gbp8/Ighv8-8/Jchain	5	BP
GO:0009150	GO:0009150	purine ribonucleotide metabolic process	4/168	318/23210	0.199496	0.49822	0.47796	Acnat2/Aldoc/Sult1b1/Gck	4	BP
GO:0022404	GO:0022404	molting cycle process	2/168	114/23210	0.199884	0.49822	0.47796	Fst/Nsdhl	2	BP
GO:0022405	GO:0022405	hair cycle process	2/168	114/23210	0.199884	0.49822	0.47796	Fst/Nsdhl	2	BP
GO:0046467	GO:0046467	membrane lipid biosynthetic process	2/168	114/23210	0.199884	0.49822	0.47796	9130409I23Rik/Elovl3	2	BP
GO:0098657	GO:0098657	import into cell	3/168	213/23210	0.200728	0.49822	0.47796	Atp4a/Adrb1/Kcnj9	3	BP
GO:0001893	GO:0001893	maternal placenta development	1/168	31/23210	0.201762	0.49822	0.47796	Nodal	1	BP
GO:0002026	GO:0002026	regulation of the force of heart contraction	1/168	31/23210	0.201762	0.49822	0.47796	Adrb1	1	BP
GO:0008299	GO:0008299	isoprenoid biosynthetic process	1/168	31/23210	0.201762	0.49822	0.47796	Idi1	1	BP
GO:0009584	GO:0009584	detection of visible light	1/168	31/23210	0.201762	0.49822	0.47796	Gnat1	1	BP
GO:0010574	GO:0010574	regulation of vascular endothelial growth factor production	1/168	31/23210	0.201762	0.49822	0.47796	Nodal	1	BP
GO:0019884	GO:0019884	antigen processing and presentation of exogenous antigen	1/168	31/23210	0.201762	0.49822	0.47796	Ctse	1	BP
GO:0033139	GO:0033139	regulation of peptidyl-serine phosphorylation of STAT protein	1/168	31/23210	0.201762	0.49822	0.47796	Gfra2	1	BP
GO:0033561	GO:0033561	regulation of water loss via skin	1/168	31/23210	0.201762	0.49822	0.47796	Cela2a	1	BP
GO:0042036	GO:0042036	negative regulation of cytokine biosynthetic process	1/168	31/23210	0.201762	0.49822	0.47796	Inhbb	1	BP
GO:0042634	GO:0042634	regulation of hair cycle	1/168	31/23210	0.201762	0.49822	0.47796	Fst	1	BP
GO:0043901	GO:0043901	negative regulation of multi-organism process	1/168	31/23210	0.201762	0.49822	0.47796	Nodal	1	BP
GO:0045932	GO:0045932	negative regulation of muscle contraction	1/168	31/23210	0.201762	0.49822	0.47796	Adrb1	1	BP
GO:0051491	GO:0051491	positive regulation of filopodium assembly	1/168	31/23210	0.201762	0.49822	0.47796	Prkcq	1	BP
GO:0055075	GO:0055075	potassium ion homeostasis	1/168	31/23210	0.201762	0.49822	0.47796	Atp4a	1	BP
GO:0060795	GO:0060795	cell fate commitment involved in formation of primary germ layer	1/168	31/23210	0.201762	0.49822	0.47796	Nodal	1	BP
GO:0071875	GO:0071875	adrenergic receptor signaling pathway	1/168	31/23210	0.201762	0.49822	0.47796	Adrb1	1	BP
GO:0086010	GO:0086010	membrane depolarization during action potential	1/168	31/23210	0.201762	0.49822	0.47796	Cacna1c	1	BP
GO:1901661	GO:1901661	quinone metabolic process	1/168	31/23210	0.201762	0.49822	0.47796	Adh4	1	BP
GO:1902473	GO:1902473	regulation of protein localization to synapse	1/168	31/23210	0.201762	0.49822	0.47796	Nlgn2	1	BP
GO:0005976	GO:0005976	polysaccharide metabolic process	2/168	115/23210	0.202517	0.49822	0.47796	Adrb1/Gck	2	BP
GO:0006090	GO:0006090	pyruvate metabolic process	2/168	115/23210	0.202517	0.49822	0.47796	Aldoc/Gck	2	BP
GO:0043244	GO:0043244	regulation of protein-containing complex disassembly	2/168	115/23210	0.202517	0.49822	0.47796	Irak3/Tmod4	2	BP
GO:0033673	GO:0033673	negative regulation of kinase activity	3/168	214/23210	0.202581	0.49822	0.47796	Ptk6/Irak3/Ptpn22	3	BP
GO:0060047	GO:0060047	heart contraction	3/168	214/23210	0.202581	0.49822	0.47796	Cacna1c/Tnnc1/Adrb1	3	BP
GO:0033157	GO:0033157	regulation of intracellular protein transport	3/168	215/23210	0.204439	0.501167	0.480787	Atpif1/Prkcq/Ptpn22	3	BP
GO:0048545	GO:0048545	response to steroid hormone	3/168	215/23210	0.204439	0.501167	0.480787	Cyp7b1/Hsd3b5/Nodal	3	BP
GO:0046545	GO:0046545	development of primary female sexual characteristics	2/168	116/23210	0.205154	0.501167	0.480787	Afp/Fst	2	BP
GO:0042063	GO:0042063	gliogenesis	4/168	323/23210	0.206944	0.501167	0.480787	Olig1/Pitx3/S100a8/Phgdh	4	BP
GO:0006220	GO:0006220	pyrimidine nucleotide metabolic process	1/168	32/23210	0.207547	0.501167	0.480787	Dctpp1	1	BP
GO:0009262	GO:0009262	deoxyribonucleotide metabolic process	1/168	32/23210	0.207547	0.501167	0.480787	Dctpp1	1	BP
GO:0017004	GO:0017004	cytochrome complex assembly	1/168	32/23210	0.207547	0.501167	0.480787	Pet100	1	BP
GO:0032212	GO:0032212	positive regulation of telomere maintenance via telomerase	1/168	32/23210	0.207547	0.501167	0.480787	Prkcq	1	BP
GO:0032728	GO:0032728	positive regulation of interferon-beta production	1/168	32/23210	0.207547	0.501167	0.480787	Ptpn22	1	BP
GO:0032743	GO:0032743	positive regulation of interleukin-2 production	1/168	32/23210	0.207547	0.501167	0.480787	Prkcq	1	BP
GO:0045672	GO:0045672	positive regulation of osteoclast differentiation	1/168	32/23210	0.207547	0.501167	0.480787	Ocstamp	1	BP
GO:0045745	GO:0045745	positive regulation of G protein-coupled receptor signaling pathway	1/168	32/23210	0.207547	0.501167	0.480787	Adrb1	1	BP
GO:0072538	GO:0072538	T-helper 17 type immune response	1/168	32/23210	0.207547	0.501167	0.480787	Prkcq	1	BP
GO:0097242	GO:0097242	amyloid-beta clearance	1/168	32/23210	0.207547	0.501167	0.480787	Cyp51	1	BP
GO:1902110	GO:1902110	positive regulation of mitochondrial membrane permeability involved in apoptotic process	1/168	32/23210	0.207547	0.501167	0.480787	Atpif1	1	BP
GO:0009132	GO:0009132	nucleoside diphosphate metabolic process	2/168	117/23210	0.207795	0.501167	0.480787	Aldoc/Gck	2	BP
GO:0045862	GO:0045862	positive regulation of proteolysis	4/168	325/23210	0.209946	0.503478	0.483004	Atpif1/Diablo/Nodal/S100a8	4	BP
GO:0042476	GO:0042476	odontogenesis	2/168	118/23210	0.210439	0.503478	0.483004	Fst/Cnnm4	2	BP
GO:0046620	GO:0046620	regulation of organ growth	2/168	118/23210	0.210439	0.503478	0.483004	Cacna1c/Adrb1	2	BP
GO:0003073	GO:0003073	regulation of systemic arterial blood pressure	2/168	119/23210	0.213087	0.503478	0.483004	Adrb1/Klk1	2	BP
GO:1990266	GO:1990266	neutrophil migration	2/168	119/23210	0.213087	0.503478	0.483004	S100a8/Csf3r	2	BP
GO:0001706	GO:0001706	endoderm formation	1/168	33/23210	0.213291	0.503478	0.483004	Nodal	1	BP
GO:0002082	GO:0002082	regulation of oxidative phosphorylation	1/168	33/23210	0.213291	0.503478	0.483004	Apoc3	1	BP
GO:0003081	GO:0003081	regulation of systemic arterial blood pressure by renin-angiotensin	1/168	33/23210	0.213291	0.503478	0.483004	Adrb1	1	BP
GO:0007271	GO:0007271	synaptic transmission, cholinergic	1/168	33/23210	0.213291	0.503478	0.483004	Chrm3	1	BP
GO:0010543	GO:0010543	regulation of platelet activation	1/168	33/23210	0.213291	0.503478	0.483004	Prkcq	1	BP
GO:0010573	GO:0010573	vascular endothelial growth factor production	1/168	33/23210	0.213291	0.503478	0.483004	Nodal	1	BP
GO:0032660	GO:0032660	regulation of interleukin-17 production	1/168	33/23210	0.213291	0.503478	0.483004	Prkcq	1	BP
GO:0034142	GO:0034142	toll-like receptor 4 signaling pathway	1/168	33/23210	0.213291	0.503478	0.483004	Ptpn22	1	BP
GO:0043950	GO:0043950	positive regulation of cAMP-mediated signaling	1/168	33/23210	0.213291	0.503478	0.483004	Adrb1	1	BP
GO:0060740	GO:0060740	prostate gland epithelium morphogenesis	1/168	33/23210	0.213291	0.503478	0.483004	Cyp7b1	1	BP
GO:0086091	GO:0086091	regulation of heart rate by cardiac conduction	1/168	33/23210	0.213291	0.503478	0.483004	Cacna1c	1	BP
GO:1903146	GO:1903146	regulation of autophagy of mitochondrion	1/168	33/23210	0.213291	0.503478	0.483004	Atpif1	1	BP
GO:1905606	GO:1905606	regulation of presynapse assembly	1/168	33/23210	0.213291	0.503478	0.483004	Nlgn2	1	BP
GO:0009259	GO:0009259	ribonucleotide metabolic process	4/168	328/23210	0.214473	0.504086	0.483587	Acnat2/Aldoc/Sult1b1/Gck	4	BP
GO:0002460	GO:0002460	adaptive immune response based on somatic recombination of immune receptors built from immunoglobulin superfamily domains	5/168	441/23210	0.216049	0.504086	0.483587	Gzmm/Susd4/Gzmb/Ighv8-8/Prkcq	5	BP
GO:0001889	GO:0001889	liver development	2/168	121/23210	0.218393	0.504086	0.483587	Nodal/Onecut1	2	BP
GO:0008286	GO:0008286	insulin receptor signaling pathway	2/168	121/23210	0.218393	0.504086	0.483587	Serpina12/Prkcq	2	BP
GO:0042089	GO:0042089	cytokine biosynthetic process	2/168	121/23210	0.218393	0.504086	0.483587	Inhbb/Prkcq	2	BP
GO:0048565	GO:0048565	digestive tract development	2/168	121/23210	0.218393	0.504086	0.483587	Nodal/Ptk6	2	BP
GO:1900180	GO:1900180	regulation of protein localization to nucleus	2/168	121/23210	0.218393	0.504086	0.483587	Prkcq/Ptpn22	2	BP
GO:0000096	GO:0000096	sulfur amino acid metabolic process	1/168	34/23210	0.218994	0.504086	0.483587	Csad	1	BP
GO:0002021	GO:0002021	response to dietary excess	1/168	34/23210	0.218994	0.504086	0.483587	Adrb1	1	BP
GO:0006739	GO:0006739	NADP metabolic process	1/168	34/23210	0.218994	0.504086	0.483587	Gck	1	BP
GO:0009311	GO:0009311	oligosaccharide metabolic process	1/168	34/23210	0.218994	0.504086	0.483587	Treh	1	BP
GO:0018208	GO:0018208	peptidyl-proline modification	1/168	34/23210	0.218994	0.504086	0.483587	Ntmt1	1	BP
GO:0031069	GO:0031069	hair follicle morphogenesis	1/168	34/23210	0.218994	0.504086	0.483587	Fst	1	BP
GO:0032094	GO:0032094	response to food	1/168	34/23210	0.218994	0.504086	0.483587	Mup1	1	BP
GO:0042832	GO:0042832	defense response to protozoan	1/168	34/23210	0.218994	0.504086	0.483587	Gbp8	1	BP
GO:0050869	GO:0050869	negative regulation of B cell activation	1/168	34/23210	0.218994	0.504086	0.483587	Bank1	1	BP
GO:0051953	GO:0051953	negative regulation of amine transport	1/168	34/23210	0.218994	0.504086	0.483587	Gck	1	BP
GO:0060512	GO:0060512	prostate gland morphogenesis	1/168	34/23210	0.218994	0.504086	0.483587	Cyp7b1	1	BP
GO:0099068	GO:0099068	postsynapse assembly	1/168	34/23210	0.218994	0.504086	0.483587	Nlgn2	1	BP
GO:1902686	GO:1902686	mitochondrial outer membrane permeabilization involved in programmed cell death	1/168	34/23210	0.218994	0.504086	0.483587	Atpif1	1	BP
GO:0043500	GO:0043500	muscle adaptation	2/168	122/23210	0.22105	0.504086	0.483587	Tnnc1/Adrb1	2	BP
GO:0060996	GO:0060996	dendritic spine development	2/168	122/23210	0.22105	0.504086	0.483587	D16Ertd472e/Nlgn2	2	BP
GO:0003015	GO:0003015	heart process	3/168	224/23210	0.221328	0.504086	0.483587	Cacna1c/Tnnc1/Adrb1	3	BP
GO:0006665	GO:0006665	sphingolipid metabolic process	2/168	123/23210	0.22371	0.504086	0.483587	9130409I23Rik/Elovl3	2	BP
GO:0042157	GO:0042157	lipoprotein metabolic process	2/168	123/23210	0.22371	0.504086	0.483587	Apoc3/Apom	2	BP
GO:0071621	GO:0071621	granulocyte chemotaxis	2/168	123/23210	0.22371	0.504086	0.483587	S100a8/Csf3r	2	BP
GO:0002701	GO:0002701	negative regulation of production of molecular mediator of immune response	1/168	35/23210	0.224655	0.504086	0.483587	Irak3	1	BP
GO:0009954	GO:0009954	proximal/distal pattern formation	1/168	35/23210	0.224655	0.504086	0.483587	Nodal	1	BP
GO:0015804	GO:0015804	neutral amino acid transport	1/168	35/23210	0.224655	0.504086	0.483587	Slc43a1	1	BP
GO:0021846	GO:0021846	cell proliferation in forebrain	1/168	35/23210	0.224655	0.504086	0.483587	Dct	1	BP
GO:0032228	GO:0032228	regulation of synaptic transmission, GABAergic	1/168	35/23210	0.224655	0.504086	0.483587	Nlgn2	1	BP
GO:0033146	GO:0033146	regulation of intracellular estrogen receptor signaling pathway	1/168	35/23210	0.224655	0.504086	0.483587	Cyp7b1	1	BP
GO:0034122	GO:0034122	negative regulation of toll-like receptor signaling pathway	1/168	35/23210	0.224655	0.504086	0.483587	Irak3	1	BP
GO:0046461	GO:0046461	neutral lipid catabolic process	1/168	35/23210	0.224655	0.504086	0.483587	Apoc3	1	BP
GO:0046464	GO:0046464	acylglycerol catabolic process	1/168	35/23210	0.224655	0.504086	0.483587	Apoc3	1	BP
GO:0051567	GO:0051567	histone H3-K9 methylation	1/168	35/23210	0.224655	0.504086	0.483587	Setd7	1	BP
GO:0051973	GO:0051973	positive regulation of telomerase activity	1/168	35/23210	0.224655	0.504086	0.483587	Prkcq	1	BP
GO:0055090	GO:0055090	acylglycerol homeostasis	1/168	35/23210	0.224655	0.504086	0.483587	Apoc3	1	BP
GO:0060142	GO:0060142	regulation of syncytium formation by plasma membrane fusion	1/168	35/23210	0.224655	0.504086	0.483587	Ocstamp	1	BP
GO:0062208	GO:0062208	positive regulation of pattern recognition receptor signaling pathway	1/168	35/23210	0.224655	0.504086	0.483587	Ptpn22	1	BP
GO:0070328	GO:0070328	triglyceride homeostasis	1/168	35/23210	0.224655	0.504086	0.483587	Apoc3	1	BP
GO:0070873	GO:0070873	regulation of glycogen metabolic process	1/168	35/23210	0.224655	0.504086	0.483587	Gck	1	BP
GO:0097106	GO:0097106	postsynaptic density organization	1/168	35/23210	0.224655	0.504086	0.483587	Nlgn2	1	BP
GO:1990748	GO:1990748	cellular detoxification	1/168	35/23210	0.224655	0.504086	0.483587	Adh4	1	BP
GO:2000116	GO:2000116	regulation of cysteine-type endopeptidase activity	3/168	226/23210	0.22512	0.504562	0.484044	Diablo/Nodal/S100a8	3	BP
GO:0007368	GO:0007368	determination of left/right symmetry	2/168	124/23210	0.226372	0.506232	0.485645	Nat8f5/Nodal	2	BP
GO:0061008	GO:0061008	hepaticobiliary system development	2/168	124/23210	0.226372	0.506232	0.485645	Nodal/Onecut1	2	BP
GO:0042107	GO:0042107	cytokine metabolic process	2/168	125/23210	0.229037	0.506637	0.486034	Inhbb/Prkcq	2	BP
GO:0002920	GO:0002920	regulation of humoral immune response	1/168	36/23210	0.230276	0.506637	0.486034	Susd4	1	BP
GO:0033363	GO:0033363	secretory granule organization	1/168	36/23210	0.230276	0.506637	0.486034	Baiap3	1	BP
GO:0035115	GO:0035115	embryonic forelimb morphogenesis	1/168	36/23210	0.230276	0.506637	0.486034	Cacna1c	1	BP
GO:0042311	GO:0042311	vasodilation	1/168	36/23210	0.230276	0.506637	0.486034	Adrb1	1	BP
GO:0042501	GO:0042501	serine phosphorylation of STAT protein	1/168	36/23210	0.230276	0.506637	0.486034	Gfra2	1	BP
GO:0045987	GO:0045987	positive regulation of smooth muscle contraction	1/168	36/23210	0.230276	0.506637	0.486034	Chrm3	1	BP
GO:0046329	GO:0046329	negative regulation of JNK cascade	1/168	36/23210	0.230276	0.506637	0.486034	Ptpn22	1	BP
GO:0048009	GO:0048009	insulin-like growth factor receptor signaling pathway	1/168	36/23210	0.230276	0.506637	0.486034	Igfbp1	1	BP
GO:0060219	GO:0060219	camera-type eye photoreceptor cell differentiation	1/168	36/23210	0.230276	0.506637	0.486034	Dio3	1	BP
GO:1904358	GO:1904358	positive regulation of telomere maintenance via telomere lengthening	1/168	36/23210	0.230276	0.506637	0.486034	Prkcq	1	BP
GO:1905209	GO:1905209	positive regulation of cardiocyte differentiation	1/168	36/23210	0.230276	0.506637	0.486034	Adrb1	1	BP
GO:2000516	GO:2000516	positive regulation of CD4-positive, alpha-beta T cell activation	1/168	36/23210	0.230276	0.506637	0.486034	Prkcq	1	BP
GO:0042326	GO:0042326	negative regulation of phosphorylation	5/168	452/23210	0.230459	0.506637	0.486034	Apoc3/Ptk6/Gfra2/Irak3/Ptpn22	5	BP
GO:0019693	GO:0019693	ribose phosphate metabolic process	4/168	339/23210	0.231295	0.506637	0.486034	Acnat2/Aldoc/Sult1b1/Gck	4	BP
GO:0032386	GO:0032386	regulation of intracellular transport	4/168	339/23210	0.231295	0.506637	0.486034	Atpif1/Tnnc1/Prkcq/Ptpn22	4	BP
GO:0043467	GO:0043467	regulation of generation of precursor metabolites and energy	2/168	126/23210	0.231704	0.506637	0.486034	Apoc3/Gck	2	BP
GO:0050852	GO:0050852	T cell receptor signaling pathway	2/168	126/23210	0.231704	0.506637	0.486034	Fyb2/Ptpn22	2	BP
GO:0014065	GO:0014065	phosphatidylinositol 3-kinase signaling	2/168	127/23210	0.234372	0.506637	0.486034	Serpina12/Pik3r5	2	BP
GO:0044839	GO:0044839	cell cycle G2/M phase transition	2/168	127/23210	0.234372	0.506637	0.486034	Prkcq/Rad51b	2	BP
GO:0002753	GO:0002753	cytoplasmic pattern recognition receptor signaling pathway	1/168	37/23210	0.235856	0.506637	0.486034	Ptpn22	1	BP
GO:0009112	GO:0009112	nucleobase metabolic process	1/168	37/23210	0.235856	0.506637	0.486034	Urad	1	BP
GO:0016233	GO:0016233	telomere capping	1/168	37/23210	0.235856	0.506637	0.486034	Prkcq	1	BP
GO:0032633	GO:0032633	interleukin-4 production	1/168	37/23210	0.235856	0.506637	0.486034	Prkcq	1	BP
GO:0032885	GO:0032885	regulation of polysaccharide biosynthetic process	1/168	37/23210	0.235856	0.506637	0.486034	Gck	1	BP
GO:0035794	GO:0035794	positive regulation of mitochondrial membrane permeability	1/168	37/23210	0.235856	0.506637	0.486034	Atpif1	1	BP
GO:0045684	GO:0045684	positive regulation of epidermis development	1/168	37/23210	0.235856	0.506637	0.486034	Fst	1	BP
GO:0045981	GO:0045981	positive regulation of nucleotide metabolic process	1/168	37/23210	0.235856	0.506637	0.486034	Gck	1	BP
GO:0051693	GO:0051693	actin filament capping	1/168	37/23210	0.235856	0.506637	0.486034	Tmod4	1	BP
GO:0060674	GO:0060674	placenta blood vessel development	1/168	37/23210	0.235856	0.506637	0.486034	Nsdhl	1	BP
GO:0071391	GO:0071391	cellular response to estrogen stimulus	1/168	37/23210	0.235856	0.506637	0.486034	Ocstamp	1	BP
GO:0086065	GO:0086065	cell communication involved in cardiac conduction	1/168	37/23210	0.235856	0.506637	0.486034	Cacna1c	1	BP
GO:0099174	GO:0099174	regulation of presynapse organization	1/168	37/23210	0.235856	0.506637	0.486034	Nlgn2	1	BP
GO:1900544	GO:1900544	positive regulation of purine nucleotide metabolic process	1/168	37/23210	0.235856	0.506637	0.486034	Gck	1	BP
GO:2000463	GO:2000463	positive regulation of excitatory postsynaptic potential	1/168	37/23210	0.235856	0.506637	0.486034	Nlgn2	1	BP
GO:0006163	GO:0006163	purine nucleotide metabolic process	4/168	342/23210	0.23594	0.506637	0.486034	Acnat2/Aldoc/Sult1b1/Gck	4	BP
GO:0050878	GO:0050878	regulation of body fluid levels	4/168	342/23210	0.23594	0.506637	0.486034	Chrm3/Adrb1/Cela2a/Prkcq	4	BP
GO:0009410	GO:0009410	response to xenobiotic stimulus	3/168	232/23210	0.23657	0.507444	0.486808	Sult1b1/Csad/Phgdh	3	BP
GO:0051092	GO:0051092	positive regulation of NF-kappaB transcription factor activity	2/168	128/23210	0.237043	0.507913	0.487258	Irak3/Prkcq	2	BP
GO:0042177	GO:0042177	negative regulation of protein catabolic process	2/168	129/23210	0.239715	0.511749	0.490938	Cyp51/Irak3	2	BP
GO:0050830	GO:0050830	defense response to Gram-positive bacterium	2/168	129/23210	0.239715	0.511749	0.490938	Dmbt1/Gbp8	2	BP
GO:0006813	GO:0006813	potassium ion transport	3/168	234/23210	0.24041	0.511749	0.490938	Atp4a/Gck/Kcnj9	3	BP
GO:0001562	GO:0001562	response to protozoan	1/168	38/23210	0.241396	0.511749	0.490938	Gbp8	1	BP
GO:0009066	GO:0009066	aspartate family amino acid metabolic process	1/168	38/23210	0.241396	0.511749	0.490938	Phgdh	1	BP
GO:0014002	GO:0014002	astrocyte development	1/168	38/23210	0.241396	0.511749	0.490938	S100a8	1	BP
GO:0030521	GO:0030521	androgen receptor signaling pathway	1/168	38/23210	0.241396	0.511749	0.490938	Nodal	1	BP
GO:0042149	GO:0042149	cellular response to glucose starvation	1/168	38/23210	0.241396	0.511749	0.490938	Gck	1	BP
GO:0051968	GO:0051968	positive regulation of synaptic transmission, glutamatergic	1/168	38/23210	0.241396	0.511749	0.490938	Nlgn2	1	BP
GO:1900026	GO:1900026	positive regulation of substrate adhesion-dependent cell spreading	1/168	38/23210	0.241396	0.511749	0.490938	S100a10	1	BP
GO:0007189	GO:0007189	adenylate cyclase-activating G protein-coupled receptor signaling pathway	2/168	130/23210	0.242389	0.51331	0.492436	Adgre1/Adrb1	2	BP
GO:0042303	GO:0042303	molting cycle	2/168	131/23210	0.245064	0.517877	0.496817	Fst/Nsdhl	2	BP
GO:0042633	GO:0042633	hair cycle	2/168	131/23210	0.245064	0.517877	0.496817	Fst/Nsdhl	2	BP
GO:0010613	GO:0010613	positive regulation of cardiac muscle hypertrophy	1/168	39/23210	0.246896	0.517888	0.496828	Adrb1	1	BP
GO:0043551	GO:0043551	regulation of phosphatidylinositol 3-kinase activity	1/168	39/23210	0.246896	0.517888	0.496828	Pik3r5	1	BP
GO:0048730	GO:0048730	epidermis morphogenesis	1/168	39/23210	0.246896	0.517888	0.496828	Fst	1	BP
GO:1902108	GO:1902108	regulation of mitochondrial membrane permeability involved in apoptotic process	1/168	39/23210	0.246896	0.517888	0.496828	Atpif1	1	BP
GO:1902692	GO:1902692	regulation of neuroblast proliferation	1/168	39/23210	0.246896	0.517888	0.496828	Dct	1	BP
GO:1905710	GO:1905710	positive regulation of membrane permeability	1/168	39/23210	0.246896	0.517888	0.496828	Atpif1	1	BP
GO:0045444	GO:0045444	fat cell differentiation	3/168	238/23210	0.24812	0.517888	0.496828	Wfdc21/Adrb1/Inhbb	3	BP
GO:0010001	GO:0010001	glial cell differentiation	3/168	239/23210	0.250054	0.517888	0.496828	Olig1/S100a8/Phgdh	3	BP
GO:0015850	GO:0015850	organic hydroxy compound transport	3/168	239/23210	0.250054	0.517888	0.496828	Apom/Slco1a1/Gck	3	BP
GO:1903522	GO:1903522	regulation of blood circulation	3/168	239/23210	0.250054	0.517888	0.496828	Cacna1c/Chrm3/Adrb1	3	BP
GO:0009855	GO:0009855	determination of bilateral symmetry	2/168	133/23210	0.250418	0.517888	0.496828	Nat8f5/Nodal	2	BP
GO:1901655	GO:1901655	cellular response to ketone	2/168	133/23210	0.250418	0.517888	0.496828	Mup1/Mup11	2	BP
GO:0046777	GO:0046777	protein autophosphorylation	3/168	240/23210	0.25199	0.517888	0.496828	Ptk6/Gfra2/Irak3	3	BP
GO:0000266	GO:0000266	mitochondrial fission	1/168	40/23210	0.252356	0.517888	0.496828	Gimap3	1	BP
GO:0003009	GO:0003009	skeletal muscle contraction	1/168	40/23210	0.252356	0.517888	0.496828	Tnnc1	1	BP
GO:0009409	GO:0009409	response to cold	1/168	40/23210	0.252356	0.517888	0.496828	Adrb1	1	BP
GO:0010470	GO:0010470	regulation of gastrulation	1/168	40/23210	0.252356	0.517888	0.496828	Nodal	1	BP
GO:0014742	GO:0014742	positive regulation of muscle hypertrophy	1/168	40/23210	0.252356	0.517888	0.496828	Adrb1	1	BP
GO:0032620	GO:0032620	interleukin-17 production	1/168	40/23210	0.252356	0.517888	0.496828	Prkcq	1	BP
GO:0045851	GO:0045851	pH reduction	1/168	40/23210	0.252356	0.517888	0.496828	Atp4a	1	BP
GO:0070207	GO:0070207	protein homotrimerization	1/168	40/23210	0.252356	0.517888	0.496828	Scara5	1	BP
GO:0071542	GO:0071542	dopaminergic neuron differentiation	1/168	40/23210	0.252356	0.517888	0.496828	Pitx3	1	BP
GO:0098801	GO:0098801	regulation of renal system process	1/168	40/23210	0.252356	0.517888	0.496828	Adrb1	1	BP
GO:0098926	GO:0098926	postsynaptic signal transduction	1/168	40/23210	0.252356	0.517888	0.496828	Chrm3	1	BP
GO:0110111	GO:0110111	negative regulation of animal organ morphogenesis	1/168	40/23210	0.252356	0.517888	0.496828	Dio3	1	BP
GO:0002698	GO:0002698	negative regulation of immune effector process	2/168	134/23210	0.253097	0.517888	0.496828	Susd4/Irak3	2	BP
GO:0009799	GO:0009799	specification of symmetry	2/168	134/23210	0.253097	0.517888	0.496828	Nat8f5/Nodal	2	BP
GO:0051928	GO:0051928	positive regulation of calcium ion transport	2/168	134/23210	0.253097	0.517888	0.496828	Cacna1c/Adrb1	2	BP
GO:0055123	GO:0055123	digestive system development	2/168	134/23210	0.253097	0.517888	0.496828	Nodal/Ptk6	2	BP
GO:0090316	GO:0090316	positive regulation of intracellular protein transport	2/168	134/23210	0.253097	0.517888	0.496828	Prkcq/Ptpn22	2	BP
GO:0070838	GO:0070838	divalent metal ion transport	5/168	469/23210	0.253255	0.517888	0.496828	Cacna1c/Adrb1/Cnnm4/Gck/Ptpn22	5	BP
GO:0035023	GO:0035023	regulation of Rho protein signal transduction	2/168	135/23210	0.255776	0.517888	0.496828	Tiam2/Fgd3	2	BP
GO:0010466	GO:0010466	negative regulation of peptidase activity	3/168	242/23210	0.255869	0.517888	0.496828	Itih5/Serpina12/Serpina1e	3	BP
GO:0072511	GO:0072511	divalent inorganic cation transport	5/168	472/23210	0.257337	0.517888	0.496828	Cacna1c/Adrb1/Cnnm4/Gck/Ptpn22	5	BP
GO:0001937	GO:0001937	negative regulation of endothelial cell proliferation	1/168	41/23210	0.257777	0.517888	0.496828	Atpif1	1	BP
GO:0003298	GO:0003298	physiological muscle hypertrophy	1/168	41/23210	0.257777	0.517888	0.496828	Adrb1	1	BP
GO:0003301	GO:0003301	physiological cardiac muscle hypertrophy	1/168	41/23210	0.257777	0.517888	0.496828	Adrb1	1	BP
GO:0006509	GO:0006509	membrane protein ectodomain proteolysis	1/168	41/23210	0.257777	0.517888	0.496828	Prkcq	1	BP
GO:0006953	GO:0006953	acute-phase response	1/168	41/23210	0.257777	0.517888	0.496828	Orm1	1	BP
GO:0032459	GO:0032459	regulation of protein oligomerization	1/168	41/23210	0.257777	0.517888	0.496828	Jchain	1	BP
GO:0033344	GO:0033344	cholesterol efflux	1/168	41/23210	0.257777	0.517888	0.496828	Apom	1	BP
GO:0035774	GO:0035774	positive regulation of insulin secretion involved in cellular response to glucose stimulus	1/168	41/23210	0.257777	0.517888	0.496828	Baiap3	1	BP
GO:0038083	GO:0038083	peptidyl-tyrosine autophosphorylation	1/168	41/23210	0.257777	0.517888	0.496828	Ptk6	1	BP
GO:0046627	GO:0046627	negative regulation of insulin receptor signaling pathway	1/168	41/23210	0.257777	0.517888	0.496828	Prkcq	1	BP
GO:0050856	GO:0050856	regulation of T cell receptor signaling pathway	1/168	41/23210	0.257777	0.517888	0.496828	Ptpn22	1	BP
GO:0061049	GO:0061049	cell growth involved in cardiac muscle cell development	1/168	41/23210	0.257777	0.517888	0.496828	Adrb1	1	BP
GO:0099084	GO:0099084	postsynaptic specialization organization	1/168	41/23210	0.257777	0.517888	0.496828	Nlgn2	1	BP
GO:1900744	GO:1900744	regulation of p38MAPK cascade	1/168	41/23210	0.257777	0.517888	0.496828	Ptpn22	1	BP
GO:1905953	GO:1905953	negative regulation of lipid localization	1/168	41/23210	0.257777	0.517888	0.496828	Mup1	1	BP
GO:0051091	GO:0051091	positive regulation of DNA-binding transcription factor activity	3/168	244/23210	0.259756	0.521339	0.500138	Nodal/Irak3/Prkcq	3	BP
GO:0002221	GO:0002221	pattern recognition receptor signaling pathway	2/168	137/23210	0.261135	0.523056	0.501786	Irak3/Ptpn22	2	BP
GO:0002456	GO:0002456	T cell mediated immunity	2/168	137/23210	0.261135	0.523056	0.501786	Gzmm/Gzmb	2	BP
GO:0032496	GO:0032496	response to lipopolysaccharide	4/168	359/23210	0.262658	0.523957	0.502649	Wfdc21/Cd6/Irak3/Ptpn22	4	BP
GO:0002823	GO:0002823	negative regulation of adaptive immune response based on somatic recombination of immune receptors built from immunoglobulin superfamily domains	1/168	42/23210	0.263159	0.523957	0.502649	Susd4	1	BP
GO:0030835	GO:0030835	negative regulation of actin filament depolymerization	1/168	42/23210	0.263159	0.523957	0.502649	Tmod4	1	BP
GO:0050691	GO:0050691	regulation of defense response to virus by host	1/168	42/23210	0.263159	0.523957	0.502649	Ptpn22	1	BP
GO:0055023	GO:0055023	positive regulation of cardiac muscle tissue growth	1/168	42/23210	0.263159	0.523957	0.502649	Adrb1	1	BP
GO:1900015	GO:1900015	regulation of cytokine production involved in inflammatory response	1/168	42/23210	0.263159	0.523957	0.502649	Cd6	1	BP
GO:0016571	GO:0016571	histone methylation	2/168	138/23210	0.263816	0.524741	0.503402	Ntmt1/Setd7	2	BP
GO:0062013	GO:0062013	positive regulation of small molecule metabolic process	2/168	139/23210	0.266496	0.528796	0.507292	Mup1/Gck	2	BP
GO:0005978	GO:0005978	glycogen biosynthetic process	1/168	43/23210	0.268502	0.528796	0.507292	Gck	1	BP
GO:0006110	GO:0006110	regulation of glycolytic process	1/168	43/23210	0.268502	0.528796	0.507292	Gck	1	BP
GO:0008631	GO:0008631	intrinsic apoptotic signaling pathway in response to oxidative stress	1/168	43/23210	0.268502	0.528796	0.507292	Diablo	1	BP
GO:0009250	GO:0009250	glucan biosynthetic process	1/168	43/23210	0.268502	0.528796	0.507292	Gck	1	BP
GO:0040018	GO:0040018	positive regulation of multicellular organism growth	1/168	43/23210	0.268502	0.528796	0.507292	Dio3	1	BP
GO:0043902	GO:0043902	positive regulation of multi-organism process	1/168	43/23210	0.268502	0.528796	0.507292	Inhbb	1	BP
GO:0045823	GO:0045823	positive regulation of heart contraction	1/168	43/23210	0.268502	0.528796	0.507292	Adrb1	1	BP
GO:0070232	GO:0070232	regulation of T cell apoptotic process	1/168	43/23210	0.268502	0.528796	0.507292	Prkcq	1	BP
GO:0086002	GO:0086002	cardiac muscle cell action potential involved in contraction	1/168	43/23210	0.268502	0.528796	0.507292	Cacna1c	1	BP
GO:0001909	GO:0001909	leukocyte mediated cytotoxicity	2/168	141/23210	0.271857	0.534875	0.513124	Gzmm/Gzmb	2	BP
GO:0032873	GO:0032873	negative regulation of stress-activated MAPK cascade	1/168	44/23210	0.273807	0.5354	0.513628	Ptpn22	1	BP
GO:0032881	GO:0032881	regulation of polysaccharide metabolic process	1/168	44/23210	0.273807	0.5354	0.513628	Gck	1	BP
GO:0043616	GO:0043616	keratinocyte proliferation	1/168	44/23210	0.273807	0.5354	0.513628	Fst	1	BP
GO:0051898	GO:0051898	negative regulation of protein kinase B signaling	1/168	44/23210	0.273807	0.5354	0.513628	Bank1	1	BP
GO:0070303	GO:0070303	negative regulation of stress-activated protein kinase signaling cascade	1/168	44/23210	0.273807	0.5354	0.513628	Ptpn22	1	BP
GO:0070527	GO:0070527	platelet aggregation	1/168	44/23210	0.273807	0.5354	0.513628	Prkcq	1	BP
GO:0050729	GO:0050729	positive regulation of inflammatory response	2/168	142/23210	0.274537	0.5354	0.513628	S100a8/Cd6	2	BP
GO:0106106	GO:0106106	cold-induced thermogenesis	2/168	142/23210	0.274537	0.5354	0.513628	Elovl3/Adrb1	2	BP
GO:0120161	GO:0120161	regulation of cold-induced thermogenesis	2/168	142/23210	0.274537	0.5354	0.513628	Elovl3/Adrb1	2	BP
GO:0007264	GO:0007264	small GTPase mediated signal transduction	5/168	485/23210	0.275204	0.536179	0.514374	Mmd2/Tiam2/Adrb1/Fgd3/Rasal3	5	BP
GO:0019233	GO:0019233	sensory perception of pain	2/168	143/23210	0.277216	0.537424	0.515569	Adrb1/Nlgn2	2	BP
GO:1905952	GO:1905952	regulation of lipid localization	2/168	143/23210	0.277216	0.537424	0.515569	Fitm1/Mup1	2	BP
GO:0002534	GO:0002534	cytokine production involved in inflammatory response	1/168	45/23210	0.279073	0.537424	0.515569	Cd6	1	BP
GO:0009166	GO:0009166	nucleotide catabolic process	1/168	45/23210	0.279073	0.537424	0.515569	Dctpp1	1	BP
GO:0031952	GO:0031952	regulation of protein autophosphorylation	1/168	45/23210	0.279073	0.537424	0.515569	Gfra2	1	BP
GO:0032814	GO:0032814	regulation of natural killer cell activation	1/168	45/23210	0.279073	0.537424	0.515569	Ptpn22	1	BP
GO:0035136	GO:0035136	forelimb morphogenesis	1/168	45/23210	0.279073	0.537424	0.515569	Cacna1c	1	BP
GO:0060135	GO:0060135	maternal process involved in female pregnancy	1/168	45/23210	0.279073	0.537424	0.515569	Nodal	1	BP
GO:0060421	GO:0060421	positive regulation of heart growth	1/168	45/23210	0.279073	0.537424	0.515569	Adrb1	1	BP
GO:0061647	GO:0061647	histone H3-K9 modification	1/168	45/23210	0.279073	0.537424	0.515569	Setd7	1	BP
GO:1900077	GO:1900077	negative regulation of cellular response to insulin stimulus	1/168	45/23210	0.279073	0.537424	0.515569	Prkcq	1	BP
GO:1903580	GO:1903580	positive regulation of ATP metabolic process	1/168	45/23210	0.279073	0.537424	0.515569	Gck	1	BP
GO:0008015	GO:0008015	blood circulation	5/168	488/23210	0.279365	0.537453	0.515597	Cacna1c/Chrm3/Tnnc1/Adrb1/Klk1	5	BP
GO:0007613	GO:0007613	memory	2/168	144/23210	0.279896	0.537453	0.515597	Cyp7b1/Adrb1	2	BP
GO:0098693	GO:0098693	regulation of synaptic vesicle cycle	2/168	144/23210	0.279896	0.537453	0.515597	Nlgn2/Syn1	2	BP
GO:0015980	GO:0015980	energy derivation by oxidation of organic compounds	3/168	255/23210	0.281264	0.538152	0.516267	Mup1/Adrb1/Gck	3	BP
GO:0110053	GO:0110053	regulation of actin filament organization	3/168	255/23210	0.281264	0.538152	0.516267	S100a10/Prkcq/Tmod4	3	BP
GO:0007292	GO:0007292	female gamete generation	2/168	145/23210	0.282574	0.538152	0.516267	Afp/Inhbb	2	BP
GO:0048593	GO:0048593	camera-type eye morphogenesis	2/168	145/23210	0.282574	0.538152	0.516267	Pitx3/Dio3	2	BP
GO:0048871	GO:0048871	multicellular organismal homeostasis	5/168	491/23210	0.283539	0.538152	0.516267	Elovl3/Mup1/Tff3/Adrb1/Cela2a	5	BP
GO:0001941	GO:0001941	postsynaptic membrane organization	1/168	46/23210	0.284302	0.538152	0.516267	Nlgn2	1	BP
GO:0002707	GO:0002707	negative regulation of lymphocyte mediated immunity	1/168	46/23210	0.284302	0.538152	0.516267	Susd4	1	BP
GO:0006576	GO:0006576	cellular biogenic amine metabolic process	1/168	46/23210	0.284302	0.538152	0.516267	Acmsd	1	BP
GO:0007628	GO:0007628	adult walking behavior	1/168	46/23210	0.284302	0.538152	0.516267	Cacna1c	1	BP
GO:0017158	GO:0017158	regulation of calcium ion-dependent exocytosis	1/168	46/23210	0.284302	0.538152	0.516267	Baiap3	1	BP
GO:0018198	GO:0018198	peptidyl-cysteine modification	1/168	46/23210	0.284302	0.538152	0.516267	S100a8	1	BP
GO:0048536	GO:0048536	spleen development	1/168	46/23210	0.284302	0.538152	0.516267	Onecut1	1	BP
GO:0050798	GO:0050798	activated T cell proliferation	1/168	46/23210	0.284302	0.538152	0.516267	Itgal	1	BP
GO:0090279	GO:0090279	regulation of calcium ion import	1/168	46/23210	0.284302	0.538152	0.516267	Adrb1	1	BP
GO:0140115	GO:0140115	export across plasma membrane	1/168	46/23210	0.284302	0.538152	0.516267	Atp4a	1	BP
GO:0097530	GO:0097530	granulocyte migration	2/168	146/23210	0.285252	0.539439	0.517502	S100a8/Csf3r	2	BP
GO:0046660	GO:0046660	female sex differentiation	2/168	147/23210	0.287928	0.543853	0.521737	Afp/Fst	2	BP
GO:0001990	GO:0001990	regulation of systemic arterial blood pressure by hormone	1/168	47/23210	0.289492	0.543853	0.521737	Adrb1	1	BP
GO:0002820	GO:0002820	negative regulation of adaptive immune response	1/168	47/23210	0.289492	0.543853	0.521737	Susd4	1	BP
GO:0030520	GO:0030520	intracellular estrogen receptor signaling pathway	1/168	47/23210	0.289492	0.543853	0.521737	Cyp7b1	1	BP
GO:0045907	GO:0045907	positive regulation of vasoconstriction	1/168	47/23210	0.289492	0.543853	0.521737	Chrm3	1	BP
GO:0051489	GO:0051489	regulation of filopodium assembly	1/168	47/23210	0.289492	0.543853	0.521737	Prkcq	1	BP
GO:0071300	GO:0071300	cellular response to retinoic acid	1/168	47/23210	0.289492	0.543853	0.521737	Ptk6	1	BP
GO:0002700	GO:0002700	regulation of production of molecular mediator of immune response	2/168	148/23210	0.290604	0.544821	0.522666	Irak3/Ptpn22	2	BP
GO:0002237	GO:0002237	response to molecule of bacterial origin	4/168	377/23210	0.29154	0.544821	0.522666	Wfdc21/Cd6/Irak3/Ptpn22	4	BP
GO:0072503	GO:0072503	cellular divalent inorganic cation homeostasis	5/168	497/23210	0.291923	0.544821	0.522666	Cacna1c/Mt1/Mt2/Adrb1/Gck	5	BP
GO:0001580	GO:0001580	detection of chemical stimulus involved in sensory perception of bitter taste	1/168	48/23210	0.294646	0.544821	0.522666	Gnat1	1	BP
GO:0022602	GO:0022602	ovulation cycle process	1/168	48/23210	0.294646	0.544821	0.522666	Afp	1	BP
GO:0030857	GO:0030857	negative regulation of epithelial cell differentiation	1/168	48/23210	0.294646	0.544821	0.522666	Nodal	1	BP
GO:0038066	GO:0038066	p38MAPK cascade	1/168	48/23210	0.294646	0.544821	0.522666	Ptpn22	1	BP
GO:0043550	GO:0043550	regulation of lipid kinase activity	1/168	48/23210	0.294646	0.544821	0.522666	Pik3r5	1	BP
GO:0045104	GO:0045104	intermediate filament cytoskeleton organization	1/168	48/23210	0.294646	0.544821	0.522666	Tchh	1	BP
GO:0050435	GO:0050435	amyloid-beta metabolic process	1/168	48/23210	0.294646	0.544821	0.522666	Nat8	1	BP
GO:0050850	GO:0050850	positive regulation of calcium-mediated signaling	1/168	48/23210	0.294646	0.544821	0.522666	Itgal	1	BP
GO:0050873	GO:0050873	brown fat cell differentiation	1/168	48/23210	0.294646	0.544821	0.522666	Adrb1	1	BP
GO:0051590	GO:0051590	positive regulation of neurotransmitter transport	1/168	48/23210	0.294646	0.544821	0.522666	Baiap3	1	BP
GO:0051972	GO:0051972	regulation of telomerase activity	1/168	48/23210	0.294646	0.544821	0.522666	Prkcq	1	BP
GO:0070534	GO:0070534	protein K63-linked ubiquitination	1/168	48/23210	0.294646	0.544821	0.522666	Ptpn22	1	BP
GO:0090659	GO:0090659	walking behavior	1/168	48/23210	0.294646	0.544821	0.522666	Cacna1c	1	BP
GO:2000725	GO:2000725	regulation of cardiac muscle cell differentiation	1/168	48/23210	0.294646	0.544821	0.522666	Adrb1	1	BP
GO:0050730	GO:0050730	regulation of peptidyl-tyrosine phosphorylation	3/168	263/23210	0.297009	0.548684	0.526371	Ptk6/Bank1/Ptpn22	3	BP
GO:0006606	GO:0006606	protein import into nucleus	2/168	151/23210	0.298623	0.550646	0.528253	Prkcq/Ptpn22	2	BP
GO:0051648	GO:0051648	vesicle localization	2/168	151/23210	0.298623	0.550646	0.528253	Nlgn2/Syn1	2	BP
GO:0014888	GO:0014888	striated muscle adaptation	1/168	49/23210	0.299762	0.550712	0.528317	Tnnc1	1	BP
GO:0045103	GO:0045103	intermediate filament-based process	1/168	49/23210	0.299762	0.550712	0.528317	Tchh	1	BP
GO:0048599	GO:0048599	oocyte development	1/168	49/23210	0.299762	0.550712	0.528317	Inhbb	1	BP
GO:0070229	GO:0070229	negative regulation of lymphocyte apoptotic process	1/168	49/23210	0.299762	0.550712	0.528317	Prkcq	1	BP
GO:0051260	GO:0051260	protein homooligomerization	4/168	383/23210	0.301268	0.552002	0.529554	Aldoc/Capn8/Dctpp1/Scara5	4	BP
GO:0051250	GO:0051250	negative regulation of lymphocyte activation	2/168	152/23210	0.301293	0.552002	0.529554	Bank1/Ptpn22	2	BP
GO:0071248	GO:0071248	cellular response to metal ion	2/168	152/23210	0.301293	0.552002	0.529554	Mt1/Mt2	2	BP
GO:0006303	GO:0006303	double-strand break repair via nonhomologous end joining	1/168	50/23210	0.304841	0.553036	0.530546	Dntt	1	BP
GO:0006406	GO:0006406	mRNA export from nucleus	1/168	50/23210	0.304841	0.553036	0.530546	Sarnp	1	BP
GO:0006826	GO:0006826	iron ion transport	1/168	50/23210	0.304841	0.553036	0.530546	Scara5	1	BP
GO:0042491	GO:0042491	inner ear auditory receptor cell differentiation	1/168	50/23210	0.304841	0.553036	0.530546	Mycl	1	BP
GO:0046189	GO:0046189	phenol-containing compound biosynthetic process	1/168	50/23210	0.304841	0.553036	0.530546	Dct	1	BP
GO:0048701	GO:0048701	embryonic cranial skeleton morphogenesis	1/168	50/23210	0.304841	0.553036	0.530546	Nodal	1	BP
GO:0050891	GO:0050891	multicellular organismal water homeostasis	1/168	50/23210	0.304841	0.553036	0.530546	Cela2a	1	BP
GO:0071427	GO:0071427	mRNA-containing ribonucleoprotein complex export from nucleus	1/168	50/23210	0.304841	0.553036	0.530546	Sarnp	1	BP
GO:0071675	GO:0071675	regulation of mononuclear cell migration	1/168	50/23210	0.304841	0.553036	0.530546	Pla2g7	1	BP
GO:0099054	GO:0099054	presynapse assembly	1/168	50/23210	0.304841	0.553036	0.530546	Nlgn2	1	BP
GO:0010038	GO:0010038	response to metal ion	3/168	267/23210	0.304903	0.553036	0.530546	Mt1/Mt2/Tnnc1	3	BP
GO:0071478	GO:0071478	cellular response to radiation	2/168	154/23210	0.306628	0.554514	0.531964	Cops9/Gnat1	2	BP
GO:0051170	GO:0051170	import into nucleus	2/168	155/23210	0.309293	0.554514	0.531964	Prkcq/Ptpn22	2	BP
GO:0051896	GO:0051896	regulation of protein kinase B signaling	2/168	155/23210	0.309293	0.554514	0.531964	Mup1/Bank1	2	BP
GO:0071383	GO:0071383	cellular response to steroid hormone stimulus	2/168	155/23210	0.309293	0.554514	0.531964	Cyp7b1/Nodal	2	BP
GO:0007140	GO:0007140	male meiotic nuclear division	1/168	51/23210	0.309883	0.554514	0.531964	Brdt	1	BP
GO:0009583	GO:0009583	detection of light stimulus	1/168	51/23210	0.309883	0.554514	0.531964	Gnat1	1	BP
GO:0017145	GO:0017145	stem cell division	1/168	51/23210	0.309883	0.554514	0.531964	Dct	1	BP
GO:0030834	GO:0030834	regulation of actin filament depolymerization	1/168	51/23210	0.309883	0.554514	0.531964	Tmod4	1	BP
GO:0030901	GO:0030901	midbrain development	1/168	51/23210	0.309883	0.554514	0.531964	Pitx3	1	BP
GO:0031018	GO:0031018	endocrine pancreas development	1/168	51/23210	0.309883	0.554514	0.531964	Onecut1	1	BP
GO:0032206	GO:0032206	positive regulation of telomere maintenance	1/168	51/23210	0.309883	0.554514	0.531964	Prkcq	1	BP
GO:0032648	GO:0032648	regulation of interferon-beta production	1/168	51/23210	0.309883	0.554514	0.531964	Ptpn22	1	BP
GO:0033619	GO:0033619	membrane protein proteolysis	1/168	51/23210	0.309883	0.554514	0.531964	Prkcq	1	BP
GO:0044058	GO:0044058	regulation of digestive system process	1/168	51/23210	0.309883	0.554514	0.531964	Adrb1	1	BP
GO:0050913	GO:0050913	sensory perception of bitter taste	1/168	51/23210	0.309883	0.554514	0.531964	Gnat1	1	BP
GO:1990845	GO:1990845	adaptive thermogenesis	2/168	156/23210	0.311955	0.556896	0.534249	Elovl3/Adrb1	2	BP
GO:0009755	GO:0009755	hormone-mediated signaling pathway	2/168	157/23210	0.314616	0.556896	0.534249	Cyp7b1/Nodal	2	BP
GO:0045834	GO:0045834	positive regulation of lipid metabolic process	2/168	157/23210	0.314616	0.556896	0.534249	Apoc3/Mup1	2	BP
GO:0048015	GO:0048015	phosphatidylinositol-mediated signaling	2/168	157/23210	0.314616	0.556896	0.534249	Serpina12/Pik3r5	2	BP
GO:0051924	GO:0051924	regulation of calcium ion transport	3/168	272/23210	0.314784	0.556896	0.534249	Cacna1c/Adrb1/Ptpn22	3	BP
GO:0001954	GO:0001954	positive regulation of cell-matrix adhesion	1/168	52/23210	0.31489	0.556896	0.534249	S100a10	1	BP
GO:0001960	GO:0001960	negative regulation of cytokine-mediated signaling pathway	1/168	52/23210	0.31489	0.556896	0.534249	Irak3	1	BP
GO:0032481	GO:0032481	positive regulation of type I interferon production	1/168	52/23210	0.31489	0.556896	0.534249	Ptpn22	1	BP
GO:0048247	GO:0048247	lymphocyte chemotaxis	1/168	52/23210	0.31489	0.556896	0.534249	Cyp7b1	1	BP
GO:0050912	GO:0050912	detection of chemical stimulus involved in sensory perception of taste	1/168	52/23210	0.31489	0.556896	0.534249	Gnat1	1	BP
GO:0072527	GO:0072527	pyrimidine-containing compound metabolic process	1/168	52/23210	0.31489	0.556896	0.534249	Dctpp1	1	BP
GO:1900271	GO:1900271	regulation of long-term synaptic potentiation	1/168	52/23210	0.31489	0.556896	0.534249	Adrb1	1	BP
GO:0050777	GO:0050777	negative regulation of immune response	2/168	158/23210	0.317275	0.556896	0.534249	Susd4/Irak3	2	BP
GO:0009948	GO:0009948	anterior/posterior axis specification	1/168	53/23210	0.31986	0.556896	0.534249	Nodal	1	BP
GO:0009994	GO:0009994	oocyte differentiation	1/168	53/23210	0.31986	0.556896	0.534249	Inhbb	1	BP
GO:0014014	GO:0014014	negative regulation of gliogenesis	1/168	53/23210	0.31986	0.556896	0.534249	Pitx3	1	BP
GO:0030850	GO:0030850	prostate gland development	1/168	53/23210	0.31986	0.556896	0.534249	Cyp7b1	1	BP
GO:0032210	GO:0032210	regulation of telomere maintenance via telomerase	1/168	53/23210	0.31986	0.556896	0.534249	Prkcq	1	BP
GO:0032608	GO:0032608	interferon-beta production	1/168	53/23210	0.31986	0.556896	0.534249	Ptpn22	1	BP
GO:0035176	GO:0035176	social behavior	1/168	53/23210	0.31986	0.556896	0.534249	Nlgn2	1	BP
GO:0043470	GO:0043470	regulation of carbohydrate catabolic process	1/168	53/23210	0.31986	0.556896	0.534249	Gck	1	BP
GO:0045777	GO:0045777	positive regulation of blood pressure	1/168	53/23210	0.31986	0.556896	0.534249	Adrb1	1	BP
GO:0045933	GO:0045933	positive regulation of muscle contraction	1/168	53/23210	0.31986	0.556896	0.534249	Chrm3	1	BP
GO:0046902	GO:0046902	regulation of mitochondrial membrane permeability	1/168	53/23210	0.31986	0.556896	0.534249	Atpif1	1	BP
GO:0048546	GO:0048546	digestive tract morphogenesis	1/168	53/23210	0.31986	0.556896	0.534249	Nodal	1	BP
GO:0051932	GO:0051932	synaptic transmission, GABAergic	1/168	53/23210	0.31986	0.556896	0.534249	Nlgn2	1	BP
GO:0055010	GO:0055010	ventricular cardiac muscle tissue morphogenesis	1/168	53/23210	0.31986	0.556896	0.534249	Tnnc1	1	BP
GO:0055078	GO:0055078	sodium ion homeostasis	1/168	53/23210	0.31986	0.556896	0.534249	Atp4a	1	BP
GO:0070828	GO:0070828	heterochromatin organization	1/168	53/23210	0.31986	0.556896	0.534249	Setd7	1	BP
GO:0098815	GO:0098815	modulation of excitatory postsynaptic potential	1/168	53/23210	0.31986	0.556896	0.534249	Nlgn2	1	BP
GO:1900024	GO:1900024	regulation of substrate adhesion-dependent cell spreading	1/168	53/23210	0.31986	0.556896	0.534249	S100a10	1	BP
GO:0048017	GO:0048017	inositol lipid-mediated signaling	2/168	160/23210	0.322584	0.560662	0.537862	Serpina12/Pik3r5	2	BP
GO:0051291	GO:0051291	protein heterooligomerization	2/168	160/23210	0.322584	0.560662	0.537862	Aldoc/S100a10	2	BP
GO:0045604	GO:0045604	regulation of epidermal cell differentiation	1/168	54/23210	0.324794	0.561571	0.538734	Mycl	1	BP
GO:0046503	GO:0046503	glycerolipid catabolic process	1/168	54/23210	0.324794	0.561571	0.538734	Apoc3	1	BP
GO:0055025	GO:0055025	positive regulation of cardiac muscle tissue development	1/168	54/23210	0.324794	0.561571	0.538734	Adrb1	1	BP
GO:0086001	GO:0086001	cardiac muscle cell action potential	1/168	54/23210	0.324794	0.561571	0.538734	Cacna1c	1	BP
GO:1903533	GO:1903533	regulation of protein targeting	1/168	54/23210	0.324794	0.561571	0.538734	Atpif1	1	BP
GO:2000648	GO:2000648	positive regulation of stem cell proliferation	1/168	54/23210	0.324794	0.561571	0.538734	Dct	1	BP
GO:0001523	GO:0001523	retinoid metabolic process	1/168	55/23210	0.329693	0.564179	0.541236	Adh4	1	BP
GO:0002548	GO:0002548	monocyte chemotaxis	1/168	55/23210	0.329693	0.564179	0.541236	Pla2g7	1	BP
GO:0003044	GO:0003044	regulation of systemic arterial blood pressure mediated by a chemical signal	1/168	55/23210	0.329693	0.564179	0.541236	Adrb1	1	BP
GO:0006900	GO:0006900	vesicle budding from membrane	1/168	55/23210	0.329693	0.564179	0.541236	S100a10	1	BP
GO:0030042	GO:0030042	actin filament depolymerization	1/168	55/23210	0.329693	0.564179	0.541236	Tmod4	1	BP
GO:0032655	GO:0032655	regulation of interleukin-12 production	1/168	55/23210	0.329693	0.564179	0.541236	Irak3	1	BP
GO:0035315	GO:0035315	hair cell differentiation	1/168	55/23210	0.329693	0.564179	0.541236	Mycl	1	BP
GO:0046513	GO:0046513	ceramide biosynthetic process	1/168	55/23210	0.329693	0.564179	0.541236	9130409I23Rik	1	BP
GO:0046580	GO:0046580	negative regulation of Ras protein signal transduction	1/168	55/23210	0.329693	0.564179	0.541236	Rasal3	1	BP
GO:0048066	GO:0048066	developmental pigmentation	1/168	55/23210	0.329693	0.564179	0.541236	Dct	1	BP
GO:0050732	GO:0050732	negative regulation of peptidyl-tyrosine phosphorylation	1/168	55/23210	0.329693	0.564179	0.541236	Ptk6	1	BP
GO:0051703	GO:0051703	intraspecies interaction between organisms	1/168	55/23210	0.329693	0.564179	0.541236	Nlgn2	1	BP
GO:1904064	GO:1904064	positive regulation of cation transmembrane transport	2/168	163/23210	0.330529	0.565126	0.542145	Cacna1c/Adrb1	2	BP
GO:0006643	GO:0006643	membrane lipid metabolic process	2/168	164/23210	0.333172	0.566681	0.543637	9130409I23Rik/Elovl3	2	BP
GO:0032680	GO:0032680	regulation of tumor necrosis factor production	2/168	164/23210	0.333172	0.566681	0.543637	Irak3/Ptpn22	2	BP
GO:0002704	GO:0002704	negative regulation of leukocyte mediated immunity	1/168	56/23210	0.334556	0.566681	0.543637	Susd4	1	BP
GO:0007588	GO:0007588	excretion	1/168	56/23210	0.334556	0.566681	0.543637	Cacna1c	1	BP
GO:0030104	GO:0030104	water homeostasis	1/168	56/23210	0.334556	0.566681	0.543637	Cela2a	1	BP
GO:0042596	GO:0042596	fear response	1/168	56/23210	0.334556	0.566681	0.543637	Adrb1	1	BP
GO:0060761	GO:0060761	negative regulation of response to cytokine stimulus	1/168	56/23210	0.334556	0.566681	0.543637	Irak3	1	BP
GO:1900449	GO:1900449	regulation of glutamate receptor signaling pathway	1/168	56/23210	0.334556	0.566681	0.543637	Nlgn2	1	BP
GO:0006958	GO:0006958	complement activation, classical pathway	2/168	165/23210	0.335812	0.566681	0.543637	Susd4/Ighv8-8	2	BP
GO:0007179	GO:0007179	transforming growth factor beta receptor signaling pathway	2/168	165/23210	0.335812	0.566681	0.543637	Nodal/Onecut1	2	BP
GO:0051017	GO:0051017	actin filament bundle assembly	2/168	165/23210	0.335812	0.566681	0.543637	S100a10/Prkcq	2	BP
GO:0070588	GO:0070588	calcium ion transmembrane transport	3/168	283/23210	0.336541	0.566681	0.543637	Cacna1c/Adrb1/Ptpn22	3	BP
GO:0070997	GO:0070997	neuron death	4/168	405/23210	0.337211	0.566681	0.543637	Diablo/Mt1/Pitx3/Dio3	4	BP
GO:1903555	GO:1903555	regulation of tumor necrosis factor superfamily cytokine production	2/168	166/23210	0.338449	0.566681	0.543637	Irak3/Ptpn22	2	BP
GO:0007162	GO:0007162	negative regulation of cell adhesion	3/168	284/23210	0.338518	0.566681	0.543637	Nat8/Nat8f5/Ptpn22	3	BP
GO:0000726	GO:0000726	non-recombinational repair	1/168	57/23210	0.339385	0.566681	0.543637	Dntt	1	BP
GO:0001825	GO:0001825	blastocyst formation	1/168	57/23210	0.339385	0.566681	0.543637	Nodal	1	BP
GO:0016101	GO:0016101	diterpenoid metabolic process	1/168	57/23210	0.339385	0.566681	0.543637	Adh4	1	BP
GO:0046622	GO:0046622	positive regulation of organ growth	1/168	57/23210	0.339385	0.566681	0.543637	Adrb1	1	BP
GO:0050854	GO:0050854	regulation of antigen receptor-mediated signaling pathway	1/168	57/23210	0.339385	0.566681	0.543637	Ptpn22	1	BP
GO:0050879	GO:0050879	multicellular organismal movement	1/168	57/23210	0.339385	0.566681	0.543637	Tnnc1	1	BP
GO:0050881	GO:0050881	musculoskeletal movement	1/168	57/23210	0.339385	0.566681	0.543637	Tnnc1	1	BP
GO:0050994	GO:0050994	regulation of lipid catabolic process	1/168	57/23210	0.339385	0.566681	0.543637	Apoc3	1	BP
GO:0051893	GO:0051893	regulation of focal adhesion assembly	1/168	57/23210	0.339385	0.566681	0.543637	S100a10	1	BP
GO:0090109	GO:0090109	regulation of cell-substrate junction assembly	1/168	57/23210	0.339385	0.566681	0.543637	S100a10	1	BP
GO:0099172	GO:0099172	presynapse organization	1/168	57/23210	0.339385	0.566681	0.543637	Nlgn2	1	BP
GO:0150116	GO:0150116	regulation of cell-substrate junction organization	1/168	57/23210	0.339385	0.566681	0.543637	S100a10	1	BP
GO:1901292	GO:1901292	nucleoside phosphate catabolic process	1/168	57/23210	0.339385	0.566681	0.543637	Dctpp1	1	BP
GO:0045165	GO:0045165	cell fate commitment	3/168	285/23210	0.340495	0.568036	0.544936	Nodal/Olig1/Onecut1	3	BP
GO:0032640	GO:0032640	tumor necrosis factor production	2/168	167/23210	0.341083	0.568036	0.544936	Irak3/Ptpn22	2	BP
GO:0001933	GO:0001933	negative regulation of protein phosphorylation	4/168	408/23210	0.342133	0.568036	0.544936	Ptk6/Gfra2/Irak3/Ptpn22	4	BP
GO:0002831	GO:0002831	regulation of response to biotic stimulus	3/168	286/23210	0.342472	0.568036	0.544936	Susd4/Irak3/Ptpn22	3	BP
GO:0030509	GO:0030509	BMP signaling pathway	2/168	168/23210	0.343713	0.568036	0.544936	Fst/Nodal	2	BP
GO:0061572	GO:0061572	actin filament bundle organization	2/168	168/23210	0.343713	0.568036	0.544936	S100a10/Prkcq	2	BP
GO:0032615	GO:0032615	interleukin-12 production	1/168	58/23210	0.344178	0.568036	0.544936	Irak3	1	BP
GO:0032663	GO:0032663	regulation of interleukin-2 production	1/168	58/23210	0.344178	0.568036	0.544936	Prkcq	1	BP
GO:0043330	GO:0043330	response to exogenous dsRNA	1/168	58/23210	0.344178	0.568036	0.544936	Irak3	1	BP
GO:0061337	GO:0061337	cardiac conduction	1/168	58/23210	0.344178	0.568036	0.544936	Cacna1c	1	BP
GO:0070231	GO:0070231	T cell apoptotic process	1/168	58/23210	0.344178	0.568036	0.544936	Prkcq	1	BP
GO:0098900	GO:0098900	regulation of action potential	1/168	58/23210	0.344178	0.568036	0.544936	Cacna1c	1	BP
GO:1901607	GO:1901607	alpha-amino acid biosynthetic process	1/168	58/23210	0.344178	0.568036	0.544936	Phgdh	1	BP
GO:1903510	GO:1903510	mucopolysaccharide metabolic process	1/168	58/23210	0.344178	0.568036	0.544936	Itih5	1	BP
GO:0002253	GO:0002253	activation of immune response	4/168	410/23210	0.345416	0.569608	0.546445	Fyb2/Susd4/Ighv8-8/Ptpn22	4	BP
GO:0060041	GO:0060041	retina development in camera-type eye	2/168	169/23210	0.346341	0.570191	0.547004	Gnat1/Dio3	2	BP
GO:2001257	GO:2001257	regulation of cation channel activity	2/168	169/23210	0.346341	0.570191	0.547004	Adrb1/Nlgn2	2	BP
GO:0006913	GO:0006913	nucleocytoplasmic transport	3/168	289/23210	0.348399	0.57028	0.547089	Sarnp/Prkcq/Ptpn22	3	BP
GO:0051169	GO:0051169	nuclear transport	3/168	289/23210	0.348399	0.57028	0.547089	Sarnp/Prkcq/Ptpn22	3	BP
GO:0006749	GO:0006749	glutathione metabolic process	1/168	59/23210	0.348937	0.57028	0.547089	Nat8	1	BP
GO:0010524	GO:0010524	positive regulation of calcium ion transport into cytosol	1/168	59/23210	0.348937	0.57028	0.547089	Adrb1	1	BP
GO:0015807	GO:0015807	L-amino acid transport	1/168	59/23210	0.348937	0.57028	0.547089	Slc43a1	1	BP
GO:0050907	GO:0050907	detection of chemical stimulus involved in sensory perception	1/168	59/23210	0.348937	0.57028	0.547089	Gnat1	1	BP
GO:0060711	GO:0060711	labyrinthine layer development	1/168	59/23210	0.348937	0.57028	0.547089	Nsdhl	1	BP
GO:0060986	GO:0060986	endocrine hormone secretion	1/168	59/23210	0.348937	0.57028	0.547089	Inhbb	1	BP
GO:0071706	GO:0071706	tumor necrosis factor superfamily cytokine production	2/168	170/23210	0.348964	0.57028	0.547089	Irak3/Ptpn22	2	BP
GO:0009416	GO:0009416	response to light stimulus	3/168	290/23210	0.350374	0.572116	0.54885	Cacna1c/Cops9/Gnat1	3	BP
GO:0043409	GO:0043409	negative regulation of MAPK cascade	2/168	171/23210	0.351585	0.573623	0.550296	Irak3/Ptpn22	2	BP
GO:0048511	GO:0048511	rhythmic process	3/168	291/23210	0.352348	0.57373	0.550399	Afp/Cyp7b1/Mup1	3	BP
GO:0001947	GO:0001947	heart looping	1/168	60/23210	0.353662	0.57373	0.550399	Nodal	1	BP
GO:0006081	GO:0006081	cellular aldehyde metabolic process	1/168	60/23210	0.353662	0.57373	0.550399	Adh4	1	BP
GO:0006446	GO:0006446	regulation of translational initiation	1/168	60/23210	0.353662	0.57373	0.550399	Bank1	1	BP
GO:0006879	GO:0006879	cellular iron ion homeostasis	1/168	60/23210	0.353662	0.57373	0.550399	Scara5	1	BP
GO:0030837	GO:0030837	negative regulation of actin filament polymerization	1/168	60/23210	0.353662	0.57373	0.550399	Tmod4	1	BP
GO:0045776	GO:0045776	negative regulation of blood pressure	1/168	60/23210	0.353662	0.57373	0.550399	Adrb1	1	BP
GO:0007611	GO:0007611	learning or memory	3/168	292/23210	0.354322	0.574335	0.550979	Cacna1c/Cyp7b1/Adrb1	3	BP
GO:0043588	GO:0043588	skin development	3/168	293/23210	0.356295	0.577065	0.553597	Fst/Nsdhl/Cela2a	3	BP
GO:0008652	GO:0008652	cellular amino acid biosynthetic process	1/168	61/23210	0.358352	0.578052	0.554545	Phgdh	1	BP
GO:0042698	GO:0042698	ovulation cycle	1/168	61/23210	0.358352	0.578052	0.554545	Afp	1	BP
GO:0048512	GO:0048512	circadian behavior	1/168	61/23210	0.358352	0.578052	0.554545	Mup1	1	BP
GO:0051058	GO:0051058	negative regulation of small GTPase mediated signal transduction	1/168	61/23210	0.358352	0.578052	0.554545	Rasal3	1	BP
GO:1905207	GO:1905207	regulation of cardiocyte differentiation	1/168	61/23210	0.358352	0.578052	0.554545	Adrb1	1	BP
GO:0043087	GO:0043087	regulation of GTPase activity	3/168	295/23210	0.360238	0.579662	0.556089	S100a10/Adrb1/Rasal3	3	BP
GO:0043405	GO:0043405	regulation of MAP kinase activity	3/168	295/23210	0.360238	0.579662	0.556089	Irak3/Pik3r5/Ptpn22	3	BP
GO:0050851	GO:0050851	antigen receptor-mediated signaling pathway	3/168	295/23210	0.360238	0.579662	0.556089	Fyb2/Ighv8-8/Ptpn22	3	BP
GO:0002437	GO:0002437	inflammatory response to antigenic stimulus	1/168	62/23210	0.363009	0.579662	0.556089	Cd6	1	BP
GO:0003229	GO:0003229	ventricular cardiac muscle tissue development	1/168	62/23210	0.363009	0.579662	0.556089	Tnnc1	1	BP
GO:0006721	GO:0006721	terpenoid metabolic process	1/168	62/23210	0.363009	0.579662	0.556089	Adh4	1	BP
GO:0030858	GO:0030858	positive regulation of epithelial cell differentiation	1/168	62/23210	0.363009	0.579662	0.556089	Dmbt1	1	BP
GO:0043949	GO:0043949	regulation of cAMP-mediated signaling	1/168	62/23210	0.363009	0.579662	0.556089	Adrb1	1	BP
GO:0070206	GO:0070206	protein trimerization	1/168	62/23210	0.363009	0.579662	0.556089	Scara5	1	BP
GO:0070988	GO:0070988	demethylation	1/168	62/23210	0.363009	0.579662	0.556089	Cyp3a16	1	BP
GO:1904356	GO:1904356	regulation of telomere maintenance via telomere lengthening	1/168	62/23210	0.363009	0.579662	0.556089	Prkcq	1	BP
GO:0010959	GO:0010959	regulation of metal ion transport	4/168	421/23210	0.36348	0.579662	0.556089	Cacna1c/Adrb1/Gck/Ptpn22	4	BP
GO:1903829	GO:1903829	positive regulation of cellular protein localization	3/168	297/23210	0.364178	0.579662	0.556089	Nlgn2/Prkcq/Ptpn22	3	BP
GO:0006479	GO:0006479	protein methylation	2/168	176/23210	0.364631	0.579662	0.556089	Ntmt1/Setd7	2	BP
GO:0008213	GO:0008213	protein alkylation	2/168	176/23210	0.364631	0.579662	0.556089	Ntmt1/Setd7	2	BP
GO:0006816	GO:0006816	calcium ion transport	4/168	423/23210	0.366764	0.579662	0.556089	Cacna1c/Adrb1/Gck/Ptpn22	4	BP
GO:0008016	GO:0008016	regulation of heart contraction	2/168	177/23210	0.367229	0.579662	0.556089	Cacna1c/Adrb1	2	BP
GO:0002712	GO:0002712	regulation of B cell mediated immunity	1/168	63/23210	0.367632	0.579662	0.556089	Susd4	1	BP
GO:0002889	GO:0002889	regulation of immunoglobulin mediated immune response	1/168	63/23210	0.367632	0.579662	0.556089	Susd4	1	BP
GO:0006278	GO:0006278	RNA-dependent DNA biosynthetic process	1/168	63/23210	0.367632	0.579662	0.556089	Prkcq	1	BP
GO:0007004	GO:0007004	telomere maintenance via telomerase	1/168	63/23210	0.367632	0.579662	0.556089	Prkcq	1	BP
GO:0007622	GO:0007622	rhythmic behavior	1/168	63/23210	0.367632	0.579662	0.556089	Mup1	1	BP
GO:0032677	GO:0032677	regulation of interleukin-8 production	1/168	63/23210	0.367632	0.579662	0.556089	Ptpn22	1	BP
GO:0046579	GO:0046579	positive regulation of Ras protein signal transduction	1/168	63/23210	0.367632	0.579662	0.556089	Mmd2	1	BP
GO:0048488	GO:0048488	synaptic vesicle endocytosis	1/168	63/23210	0.367632	0.579662	0.556089	Nlgn2	1	BP
GO:0099601	GO:0099601	regulation of neurotransmitter receptor activity	1/168	63/23210	0.367632	0.579662	0.556089	Nlgn2	1	BP
GO:0140238	GO:0140238	presynaptic endocytosis	1/168	63/23210	0.367632	0.579662	0.556089	Nlgn2	1	BP
GO:0010951	GO:0010951	negative regulation of endopeptidase activity	2/168	178/23210	0.369822	0.579662	0.556089	Serpina12/Serpina1e	2	BP
GO:0002449	GO:0002449	lymphocyte mediated immunity	4/168	425/23210	0.370047	0.579662	0.556089	Gzmm/Susd4/Gzmb/Ighv8-8	4	BP
GO:0050673	GO:0050673	epithelial cell proliferation	4/168	425/23210	0.370047	0.579662	0.556089	Atpif1/Cyp7b1/Fst/Nodal	4	BP
GO:0090596	GO:0090596	sensory organ morphogenesis	3/168	301/23210	0.372047	0.579662	0.556089	Gnat1/Pitx3/Dio3	3	BP
GO:0002763	GO:0002763	positive regulation of myeloid leukocyte differentiation	1/168	64/23210	0.372221	0.579662	0.556089	Ocstamp	1	BP
GO:0007566	GO:0007566	embryo implantation	1/168	64/23210	0.372221	0.579662	0.556089	Nodal	1	BP
GO:0009880	GO:0009880	embryonic pattern specification	1/168	64/23210	0.372221	0.579662	0.556089	Nodal	1	BP
GO:0009988	GO:0009988	cell-cell recognition	1/168	64/23210	0.372221	0.579662	0.556089	Cd6	1	BP
GO:0030512	GO:0030512	negative regulation of transforming growth factor beta receptor signaling pathway	1/168	64/23210	0.372221	0.579662	0.556089	Onecut1	1	BP
GO:0043331	GO:0043331	response to dsRNA	1/168	64/23210	0.372221	0.579662	0.556089	Irak3	1	BP
GO:2000514	GO:2000514	regulation of CD4-positive, alpha-beta T cell activation	1/168	64/23210	0.372221	0.579662	0.556089	Prkcq	1	BP
GO:0001906	GO:0001906	cell killing	2/168	179/23210	0.372412	0.579662	0.556089	Gzmm/Gzmb	2	BP
GO:0019933	GO:0019933	cAMP-mediated signaling	2/168	179/23210	0.372412	0.579662	0.556089	Adgre1/Adrb1	2	BP
GO:0034612	GO:0034612	response to tumor necrosis factor	2/168	179/23210	0.372412	0.579662	0.556089	Ocstamp/Wfdc21	2	BP
GO:0034767	GO:0034767	positive regulation of ion transmembrane transport	2/168	179/23210	0.372412	0.579662	0.556089	Cacna1c/Adrb1	2	BP
GO:0051188	GO:0051188	cofactor biosynthetic process	2/168	179/23210	0.372412	0.579662	0.556089	Alas1/Atpif1	2	BP
GO:0071772	GO:0071772	response to BMP	2/168	179/23210	0.372412	0.579662	0.556089	Fst/Nodal	2	BP
GO:0071773	GO:0071773	cellular response to BMP stimulus	2/168	179/23210	0.372412	0.579662	0.556089	Fst/Nodal	2	BP
GO:0002455	GO:0002455	humoral immune response mediated by circulating immunoglobulin	2/168	180/23210	0.374997	0.582373	0.55869	Susd4/Ighv8-8	2	BP
GO:0000422	GO:0000422	autophagy of mitochondrion	1/168	65/23210	0.376778	0.582373	0.55869	Atpif1	1	BP
GO:0001707	GO:0001707	mesoderm formation	1/168	65/23210	0.376778	0.582373	0.55869	Nodal	1	BP
GO:0009064	GO:0009064	glutamine family amino acid metabolic process	1/168	65/23210	0.376778	0.582373	0.55869	Phgdh	1	BP
GO:0031638	GO:0031638	zymogen activation	1/168	65/23210	0.376778	0.582373	0.55869	Klk1	1	BP
GO:0033627	GO:0033627	cell adhesion mediated by integrin	1/168	65/23210	0.376778	0.582373	0.55869	Fyb2	1	BP
GO:0060425	GO:0060425	lung morphogenesis	1/168	65/23210	0.376778	0.582373	0.55869	Nodal	1	BP
GO:0061726	GO:0061726	mitochondrion disassembly	1/168	65/23210	0.376778	0.582373	0.55869	Atpif1	1	BP
GO:0090559	GO:0090559	regulation of membrane permeability	1/168	65/23210	0.376778	0.582373	0.55869	Atpif1	1	BP
GO:0002695	GO:0002695	negative regulation of leukocyte activation	2/168	182/23210	0.380154	0.587137	0.56326	Bank1/Ptpn22	2	BP
GO:0032623	GO:0032623	interleukin-2 production	1/168	66/23210	0.381302	0.587546	0.563653	Prkcq	1	BP
GO:0071426	GO:0071426	ribonucleoprotein complex export from nucleus	1/168	66/23210	0.381302	0.587546	0.563653	Sarnp	1	BP
GO:1903845	GO:1903845	negative regulation of cellular response to transforming growth factor beta stimulus	1/168	66/23210	0.381302	0.587546	0.563653	Onecut1	1	BP
GO:2000241	GO:2000241	regulation of reproductive process	2/168	183/23210	0.382726	0.589286	0.565322	Nodal/Inhbb	2	BP
GO:0000768	GO:0000768	syncytium formation by plasma membrane fusion	1/168	67/23210	0.385793	0.589914	0.565925	Ocstamp	1	BP
GO:0003143	GO:0003143	embryonic heart tube morphogenesis	1/168	67/23210	0.385793	0.589914	0.565925	Nodal	1	BP
GO:0033692	GO:0033692	cellular polysaccharide biosynthetic process	1/168	67/23210	0.385793	0.589914	0.565925	Gck	1	BP
GO:0043113	GO:0043113	receptor clustering	1/168	67/23210	0.385793	0.589914	0.565925	Itgal	1	BP
GO:0048168	GO:0048168	regulation of neuronal synaptic plasticity	1/168	67/23210	0.385793	0.589914	0.565925	Syn1	1	BP
GO:0061371	GO:0061371	determination of heart left/right asymmetry	1/168	67/23210	0.385793	0.589914	0.565925	Nodal	1	BP
GO:0071166	GO:0071166	ribonucleoprotein complex localization	1/168	67/23210	0.385793	0.589914	0.565925	Sarnp	1	BP
GO:0140253	GO:0140253	cell-cell fusion	1/168	67/23210	0.385793	0.589914	0.565925	Ocstamp	1	BP
GO:2000242	GO:2000242	negative regulation of reproductive process	1/168	67/23210	0.385793	0.589914	0.565925	Nodal	1	BP
GO:0072330	GO:0072330	monocarboxylic acid biosynthetic process	2/168	185/23210	0.387857	0.592446	0.568353	Cyp7b1/Elovl3	2	BP
GO:0034109	GO:0034109	homotypic cell-cell adhesion	1/168	68/23210	0.390251	0.592446	0.568353	Prkcq	1	BP
GO:0048002	GO:0048002	antigen processing and presentation of peptide antigen	1/168	68/23210	0.390251	0.592446	0.568353	Ctse	1	BP
GO:1904888	GO:1904888	cranial skeletal system development	1/168	68/23210	0.390251	0.592446	0.568353	Nodal	1	BP
GO:2001244	GO:2001244	positive regulation of intrinsic apoptotic signaling pathway	1/168	68/23210	0.390251	0.592446	0.568353	S100a8	1	BP
GO:0007269	GO:0007269	neurotransmitter secretion	2/168	186/23210	0.390415	0.592446	0.568353	Baiap3/Syn1	2	BP
GO:0043491	GO:0043491	protein kinase B signaling	2/168	186/23210	0.390415	0.592446	0.568353	Mup1/Bank1	2	BP
GO:0045088	GO:0045088	regulation of innate immune response	2/168	186/23210	0.390415	0.592446	0.568353	Susd4/Irak3	2	BP
GO:0061351	GO:0061351	neural precursor cell proliferation	2/168	186/23210	0.390415	0.592446	0.568353	Dct/Pitx3	2	BP
GO:0099643	GO:0099643	signal release from synapse	2/168	186/23210	0.390415	0.592446	0.568353	Baiap3/Syn1	2	BP
GO:0006956	GO:0006956	complement activation	2/168	187/23210	0.392969	0.594398	0.570226	Susd4/Ighv8-8	2	BP
GO:0030534	GO:0030534	adult behavior	2/168	187/23210	0.392969	0.594398	0.570226	Cacna1c/Nlgn2	2	BP
GO:0042391	GO:0042391	regulation of membrane potential	4/168	439/23210	0.392992	0.594398	0.570226	Atpif1/Cacna1c/Adrb1/Nlgn2	4	BP
GO:0006949	GO:0006949	syncytium formation	1/168	69/23210	0.394678	0.594398	0.570226	Ocstamp	1	BP
GO:0007405	GO:0007405	neuroblast proliferation	1/168	69/23210	0.394678	0.594398	0.570226	Dct	1	BP
GO:0008542	GO:0008542	visual learning	1/168	69/23210	0.394678	0.594398	0.570226	Cacna1c	1	BP
GO:0032637	GO:0032637	interleukin-8 production	1/168	69/23210	0.394678	0.594398	0.570226	Ptpn22	1	BP
GO:0048332	GO:0048332	mesoderm morphogenesis	1/168	69/23210	0.394678	0.594398	0.570226	Nodal	1	BP
GO:0050885	GO:0050885	neuromuscular process controlling balance	1/168	69/23210	0.394678	0.594398	0.570226	Nlgn2	1	BP
GO:2000107	GO:2000107	negative regulation of leukocyte apoptotic process	1/168	69/23210	0.394678	0.594398	0.570226	Prkcq	1	BP
GO:0002822	GO:0002822	regulation of adaptive immune response based on somatic recombination of immune receptors built from immunoglobulin superfamily domains	2/168	189/23210	0.398061	0.598591	0.574248	Susd4/Prkcq	2	BP
GO:0007259	GO:0007259	receptor signaling pathway via JAK-STAT	2/168	189/23210	0.398061	0.598591	0.574248	Ptk6/Gfra2	2	BP
GO:0050909	GO:0050909	sensory perception of taste	1/168	70/23210	0.399072	0.598759	0.574409	Gnat1	1	BP
GO:0051057	GO:0051057	positive regulation of small GTPase mediated signal transduction	1/168	70/23210	0.399072	0.598759	0.574409	Mmd2	1	BP
GO:1903725	GO:1903725	regulation of phospholipid metabolic process	1/168	70/23210	0.399072	0.598759	0.574409	Pik3r5	1	BP
GO:0021915	GO:0021915	neural tube development	2/168	191/23210	0.403135	0.602588	0.578083	Nodal/Phgdh	2	BP
GO:0050773	GO:0050773	regulation of dendrite development	2/168	191/23210	0.403135	0.602588	0.578083	D16Ertd472e/Nlgn2	2	BP
GO:0071805	GO:0071805	potassium ion transmembrane transport	2/168	191/23210	0.403135	0.602588	0.578083	Atp4a/Kcnj9	2	BP
GO:0010611	GO:0010611	regulation of cardiac muscle hypertrophy	1/168	71/23210	0.403435	0.602588	0.578083	Adrb1	1	BP
GO:0014068	GO:0014068	positive regulation of phosphatidylinositol 3-kinase signaling	1/168	71/23210	0.403435	0.602588	0.578083	Serpina12	1	BP
GO:0050433	GO:0050433	regulation of catecholamine secretion	1/168	71/23210	0.403435	0.602588	0.578083	Gck	1	BP
GO:0032388	GO:0032388	positive regulation of intracellular transport	2/168	192/23210	0.405664	0.604711	0.58012	Prkcq/Ptpn22	2	BP
GO:0018108	GO:0018108	peptidyl-tyrosine phosphorylation	3/168	319/23210	0.407198	0.604711	0.58012	Ptk6/Bank1/Ptpn22	3	BP
GO:0007632	GO:0007632	visual behavior	1/168	72/23210	0.407767	0.604711	0.58012	Cacna1c	1	BP
GO:0030239	GO:0030239	myofibril assembly	1/168	72/23210	0.407767	0.604711	0.58012	Tmod4	1	BP
GO:0043627	GO:0043627	response to estrogen	1/168	72/23210	0.407767	0.604711	0.58012	Ocstamp	1	BP
GO:0060042	GO:0060042	retina morphogenesis in camera-type eye	1/168	72/23210	0.407767	0.604711	0.58012	Dio3	1	BP
GO:0097755	GO:0097755	positive regulation of blood vessel diameter	1/168	72/23210	0.407767	0.604711	0.58012	Adrb1	1	BP
GO:1900542	GO:1900542	regulation of purine nucleotide metabolic process	1/168	72/23210	0.407767	0.604711	0.58012	Gck	1	BP
GO:0002285	GO:0002285	lymphocyte activation involved in immune response	2/168	193/23210	0.408188	0.604711	0.58012	Apbb1ip/Itgal	2	BP
GO:0042180	GO:0042180	cellular ketone metabolic process	2/168	193/23210	0.408188	0.604711	0.58012	Adh4/Afp	2	BP
GO:0055002	GO:0055002	striated muscle cell development	2/168	193/23210	0.408188	0.604711	0.58012	Adrb1/Tmod4	2	BP
GO:0001819	GO:0001819	positive regulation of cytokine production	4/168	449/23210	0.409312	0.605111	0.580503	Nodal/Cd6/Prkcq/Ptpn22	4	BP
GO:0097696	GO:0097696	receptor signaling pathway via STAT	2/168	194/23210	0.410706	0.605111	0.580503	Ptk6/Gfra2	2	BP
GO:0003407	GO:0003407	neural retina development	1/168	73/23210	0.412067	0.605111	0.580503	Dio3	1	BP
GO:0006140	GO:0006140	regulation of nucleotide metabolic process	1/168	73/23210	0.412067	0.605111	0.580503	Gck	1	BP
GO:0006626	GO:0006626	protein targeting to mitochondrion	1/168	73/23210	0.412067	0.605111	0.580503	Atpif1	1	BP
GO:0010822	GO:0010822	positive regulation of mitochondrion organization	1/168	73/23210	0.412067	0.605111	0.580503	Atpif1	1	BP
GO:0019731	GO:0019731	antibacterial humoral response	1/168	73/23210	0.412067	0.605111	0.580503	Jchain	1	BP
GO:0031060	GO:0031060	regulation of histone methylation	1/168	73/23210	0.412067	0.605111	0.580503	Setd7	1	BP
GO:0045670	GO:0045670	regulation of osteoclast differentiation	1/168	73/23210	0.412067	0.605111	0.580503	Ocstamp	1	BP
GO:0051155	GO:0051155	positive regulation of striated muscle cell differentiation	1/168	73/23210	0.412067	0.605111	0.580503	Adrb1	1	BP
GO:0060191	GO:0060191	regulation of lipase activity	1/168	73/23210	0.412067	0.605111	0.580503	Apoc3	1	BP
GO:0002683	GO:0002683	negative regulation of immune system process	4/168	451/23210	0.412567	0.605111	0.580503	Susd4/Bank1/Irak3/Ptpn22	4	BP
GO:0018212	GO:0018212	peptidyl-tyrosine modification	3/168	322/23210	0.413005	0.605111	0.580503	Ptk6/Bank1/Ptpn22	3	BP
GO:1902905	GO:1902905	positive regulation of supramolecular fiber organization	2/168	195/23210	0.41322	0.605111	0.580503	S100a10/Prkcq	2	BP
GO:0002532	GO:0002532	production of molecular mediator involved in inflammatory response	1/168	74/23210	0.416336	0.605111	0.580503	Cd6	1	BP
GO:0007193	GO:0007193	adenylate cyclase-inhibiting G protein-coupled receptor signaling pathway	1/168	74/23210	0.416336	0.605111	0.580503	Chrm3	1	BP
GO:0009060	GO:0009060	aerobic respiration	1/168	74/23210	0.416336	0.605111	0.580503	Mup1	1	BP
GO:0010507	GO:0010507	negative regulation of autophagy	1/168	74/23210	0.416336	0.605111	0.580503	Ptpn22	1	BP
GO:0014743	GO:0014743	regulation of muscle hypertrophy	1/168	74/23210	0.416336	0.605111	0.580503	Adrb1	1	BP
GO:0021766	GO:0021766	hippocampus development	1/168	74/23210	0.416336	0.605111	0.580503	Hsd3b5	1	BP
GO:0034404	GO:0034404	nucleobase-containing small molecule biosynthetic process	1/168	74/23210	0.416336	0.605111	0.580503	Dctpp1	1	BP
GO:0036465	GO:0036465	synaptic vesicle recycling	1/168	74/23210	0.416336	0.605111	0.580503	Nlgn2	1	BP
GO:0042108	GO:0042108	positive regulation of cytokine biosynthetic process	1/168	74/23210	0.416336	0.605111	0.580503	Prkcq	1	BP
GO:0050432	GO:0050432	catecholamine secretion	1/168	74/23210	0.416336	0.605111	0.580503	Gck	1	BP
GO:1901880	GO:1901880	negative regulation of protein depolymerization	1/168	74/23210	0.416336	0.605111	0.580503	Tmod4	1	BP
GO:2000573	GO:2000573	positive regulation of DNA biosynthetic process	1/168	74/23210	0.416336	0.605111	0.580503	Prkcq	1	BP
GO:0007005	GO:0007005	mitochondrion organization	4/168	454/23210	0.417442	0.606278	0.581623	Atpif1/Mup1/Pet100/Gimap3	4	BP
GO:0000271	GO:0000271	polysaccharide biosynthetic process	1/168	75/23210	0.420574	0.607944	0.583221	Gck	1	BP
GO:0007260	GO:0007260	tyrosine phosphorylation of STAT protein	1/168	75/23210	0.420574	0.607944	0.583221	Ptk6	1	BP
GO:0032272	GO:0032272	negative regulation of protein polymerization	1/168	75/23210	0.420574	0.607944	0.583221	Tmod4	1	BP
GO:0042446	GO:0042446	hormone biosynthetic process	1/168	75/23210	0.420574	0.607944	0.583221	Dio3	1	BP
GO:0061097	GO:0061097	regulation of protein tyrosine kinase activity	1/168	75/23210	0.420574	0.607944	0.583221	Ptk6	1	BP
GO:0002429	GO:0002429	immune response-activating cell surface receptor signaling pathway	3/168	326/23210	0.42072	0.607944	0.583221	Fyb2/Ighv8-8/Ptpn22	3	BP
GO:0050890	GO:0050890	cognition	3/168	326/23210	0.42072	0.607944	0.583221	Cacna1c/Cyp7b1/Adrb1	3	BP
GO:0002757	GO:0002757	immune response-activating signal transduction	3/168	327/23210	0.422644	0.609268	0.584491	Fyb2/Ighv8-8/Ptpn22	3	BP
GO:0007204	GO:0007204	positive regulation of cytosolic calcium ion concentration	3/168	327/23210	0.422644	0.609268	0.584491	Cacna1c/Adrb1/Gck	3	BP
GO:0050679	GO:0050679	positive regulation of epithelial cell proliferation	2/168	199/23210	0.423221	0.609268	0.584491	Cyp7b1/Nodal	2	BP
GO:0006405	GO:0006405	RNA export from nucleus	1/168	76/23210	0.424782	0.609268	0.584491	Sarnp	1	BP
GO:0030168	GO:0030168	platelet activation	1/168	76/23210	0.424782	0.609268	0.584491	Prkcq	1	BP
GO:0048041	GO:0048041	focal adhesion assembly	1/168	76/23210	0.424782	0.609268	0.584491	S100a10	1	BP
GO:0055008	GO:0055008	cardiac muscle tissue morphogenesis	1/168	76/23210	0.424782	0.609268	0.584491	Tnnc1	1	BP
GO:0070228	GO:0070228	regulation of lymphocyte apoptotic process	1/168	76/23210	0.424782	0.609268	0.584491	Prkcq	1	BP
GO:1901888	GO:1901888	regulation of cell junction assembly	2/168	200/23210	0.425708	0.609268	0.584491	S100a10/Nlgn2	2	BP
GO:0008544	GO:0008544	epidermis development	3/168	329/23210	0.426485	0.609268	0.584491	Fst/Mycl/Nsdhl	3	BP
GO:0002685	GO:0002685	regulation of leukocyte migration	2/168	201/23210	0.428189	0.609268	0.584491	Pla2g7/Ptpn22	2	BP
GO:0045666	GO:0045666	positive regulation of neuron differentiation	4/168	461/23210	0.428782	0.609268	0.584491	D16Ertd472e/Mmd2/Ptk6/Nlgn2	4	BP
GO:0010833	GO:0010833	telomere maintenance via telomere lengthening	1/168	77/23210	0.428959	0.609268	0.584491	Prkcq	1	BP
GO:0015918	GO:0015918	sterol transport	1/168	77/23210	0.428959	0.609268	0.584491	Apom	1	BP
GO:0030193	GO:0030193	regulation of blood coagulation	1/168	77/23210	0.428959	0.609268	0.584491	Prkcq	1	BP
GO:0030301	GO:0030301	cholesterol transport	1/168	77/23210	0.428959	0.609268	0.584491	Apom	1	BP
GO:0032088	GO:0032088	negative regulation of NF-kappaB transcription factor activity	1/168	77/23210	0.428959	0.609268	0.584491	Irak3	1	BP
GO:0032729	GO:0032729	positive regulation of interferon-gamma production	1/168	77/23210	0.428959	0.609268	0.584491	Ptpn22	1	BP
GO:0033108	GO:0033108	mitochondrial respiratory chain complex assembly	1/168	77/23210	0.428959	0.609268	0.584491	Pet100	1	BP
GO:0050688	GO:0050688	regulation of defense response to virus	1/168	77/23210	0.428959	0.609268	0.584491	Ptpn22	1	BP
GO:0051965	GO:0051965	positive regulation of synapse assembly	1/168	77/23210	0.428959	0.609268	0.584491	Nlgn2	1	BP
GO:0051966	GO:0051966	regulation of synaptic transmission, glutamatergic	1/168	77/23210	0.428959	0.609268	0.584491	Nlgn2	1	BP
GO:0055021	GO:0055021	regulation of cardiac muscle tissue growth	1/168	77/23210	0.428959	0.609268	0.584491	Adrb1	1	BP
GO:0071347	GO:0071347	cellular response to interleukin-1	1/168	77/23210	0.428959	0.609268	0.584491	Irak3	1	BP
GO:0017038	GO:0017038	protein import	2/168	202/23210	0.430665	0.610822	0.585982	Prkcq/Ptpn22	2	BP
GO:0098742	GO:0098742	cell-cell adhesion via plasma-membrane adhesion molecules	2/168	202/23210	0.430665	0.610822	0.585982	Cd6/Itgal	2	BP
GO:0034637	GO:0034637	cellular carbohydrate biosynthetic process	1/168	78/23210	0.433106	0.611719	0.586842	Gck	1	BP
GO:0034644	GO:0034644	cellular response to UV	1/168	78/23210	0.433106	0.611719	0.586842	Cops9	1	BP
GO:0051881	GO:0051881	regulation of mitochondrial membrane potential	1/168	78/23210	0.433106	0.611719	0.586842	Atpif1	1	BP
GO:1900046	GO:1900046	regulation of hemostasis	1/168	78/23210	0.433106	0.611719	0.586842	Prkcq	1	BP
GO:2001259	GO:2001259	positive regulation of cation channel activity	1/168	78/23210	0.433106	0.611719	0.586842	Adrb1	1	BP
GO:0050866	GO:0050866	negative regulation of cell activation	2/168	203/23210	0.433135	0.611719	0.586842	Bank1/Ptpn22	2	BP
GO:0071560	GO:0071560	cellular response to transforming growth factor beta stimulus	2/168	204/23210	0.435599	0.614451	0.589463	Nodal/Onecut1	2	BP
GO:0031346	GO:0031346	positive regulation of cell projection organization	4/168	466/23210	0.436848	0.614451	0.589463	D16Ertd472e/Ptk6/Nlgn2/Prkcq	4	BP
GO:0003208	GO:0003208	cardiac ventricle morphogenesis	1/168	79/23210	0.437223	0.614451	0.589463	Tnnc1	1	BP
GO:0042147	GO:0042147	retrograde transport, endosome to Golgi	1/168	79/23210	0.437223	0.614451	0.589463	Baiap3	1	BP
GO:0043525	GO:0043525	positive regulation of neuron apoptotic process	1/168	79/23210	0.437223	0.614451	0.589463	Pitx3	1	BP
GO:0044272	GO:0044272	sulfur compound biosynthetic process	1/168	79/23210	0.437223	0.614451	0.589463	Csad	1	BP
GO:0048663	GO:0048663	neuron fate commitment	1/168	79/23210	0.437223	0.614451	0.589463	Olig1	1	BP
GO:0002819	GO:0002819	regulation of adaptive immune response	2/168	205/23210	0.438058	0.614758	0.589759	Susd4/Prkcq	2	BP
GO:0032984	GO:0032984	protein-containing complex disassembly	2/168	205/23210	0.438058	0.614758	0.589759	Irak3/Tmod4	2	BP
GO:0060113	GO:0060113	inner ear receptor cell differentiation	1/168	80/23210	0.441311	0.618889	0.593721	Mycl	1	BP
GO:0055001	GO:0055001	muscle cell development	2/168	207/23210	0.442958	0.620049	0.594834	Adrb1/Tmod4	2	BP
GO:0002768	GO:0002768	immune response-regulating cell surface receptor signaling pathway	3/168	338/23210	0.443657	0.620049	0.594834	Fyb2/Ighv8-8/Ptpn22	3	BP
GO:0032259	GO:0032259	methylation	3/168	338/23210	0.443657	0.620049	0.594834	Nnmt/Ntmt1/Setd7	3	BP
GO:0031646	GO:0031646	positive regulation of nervous system process	1/168	81/23210	0.445369	0.620049	0.594834	Nlgn2	1	BP
GO:0032479	GO:0032479	regulation of type I interferon production	1/168	81/23210	0.445369	0.620049	0.594834	Ptpn22	1	BP
GO:0044106	GO:0044106	cellular amine metabolic process	1/168	81/23210	0.445369	0.620049	0.594834	Acmsd	1	BP
GO:0050818	GO:0050818	regulation of coagulation	1/168	81/23210	0.445369	0.620049	0.594834	Prkcq	1	BP
GO:0007623	GO:0007623	circadian rhythm	2/168	208/23210	0.445399	0.620049	0.594834	Cyp7b1/Mup1	2	BP
GO:0071559	GO:0071559	response to transforming growth factor beta	2/168	208/23210	0.445399	0.620049	0.594834	Nodal/Onecut1	2	BP
GO:0006869	GO:0006869	lipid transport	3/168	339/23210	0.445553	0.620049	0.594834	Apoc3/Apom/Slco1a1	3	BP
GO:0031589	GO:0031589	cell-substrate adhesion	3/168	339/23210	0.445553	0.620049	0.594834	Onecut1/S100a10/Itgal	3	BP
GO:0097305	GO:0097305	response to alcohol	2/168	209/23210	0.447834	0.621931	0.596639	Hsd3b5/Inhbb	2	BP
GO:0002764	GO:0002764	immune response-regulating signaling pathway	3/168	341/23210	0.449338	0.621931	0.596639	Fyb2/Ighv8-8/Ptpn22	3	BP
GO:0002718	GO:0002718	regulation of cytokine production involved in immune response	1/168	82/23210	0.449397	0.621931	0.596639	Irak3	1	BP
GO:0006637	GO:0006637	acyl-CoA metabolic process	1/168	82/23210	0.449397	0.621931	0.596639	Acnat2	1	BP
GO:0021872	GO:0021872	forebrain generation of neurons	1/168	82/23210	0.449397	0.621931	0.596639	Dct	1	BP
GO:0032204	GO:0032204	regulation of telomere maintenance	1/168	82/23210	0.449397	0.621931	0.596639	Prkcq	1	BP
GO:0035050	GO:0035050	embryonic heart tube development	1/168	82/23210	0.449397	0.621931	0.596639	Nodal	1	BP
GO:0035383	GO:0035383	thioester metabolic process	1/168	82/23210	0.449397	0.621931	0.596639	Acnat2	1	BP
GO:0019935	GO:0019935	cyclic-nucleotide-mediated signaling	2/168	210/23210	0.450263	0.622698	0.597375	Adgre1/Adrb1	2	BP
GO:0010810	GO:0010810	regulation of cell-substrate adhesion	2/168	211/23210	0.452686	0.623577	0.598218	Onecut1/S100a10	2	BP
GO:0018209	GO:0018209	peptidyl-serine modification	3/168	343/23210	0.453112	0.623577	0.598218	Ntmt1/Gfra2/Prkcq	3	BP
GO:0045861	GO:0045861	negative regulation of proteolysis	3/168	343/23210	0.453112	0.623577	0.598218	Itih5/Serpina12/Serpina1e	3	BP
GO:0006672	GO:0006672	ceramide metabolic process	1/168	83/23210	0.453397	0.623577	0.598218	9130409I23Rik	1	BP
GO:0030203	GO:0030203	glycosaminoglycan metabolic process	1/168	83/23210	0.453397	0.623577	0.598218	Itih5	1	BP
GO:0071674	GO:0071674	mononuclear cell migration	1/168	83/23210	0.453397	0.623577	0.598218	Pla2g7	1	BP
GO:1901992	GO:1901992	positive regulation of mitotic cell cycle phase transition	1/168	83/23210	0.453397	0.623577	0.598218	Rad51b	1	BP
GO:1903321	GO:1903321	negative regulation of protein modification by small protein conjugation or removal	1/168	83/23210	0.453397	0.623577	0.598218	Cops9	1	BP
GO:0032956	GO:0032956	regulation of actin cytoskeleton organization	3/168	344/23210	0.454996	0.625345	0.599914	S100a10/Prkcq/Tmod4	3	BP
GO:0045844	GO:0045844	positive regulation of striated muscle tissue development	1/168	84/23210	0.457367	0.626221	0.600755	Adrb1	1	BP
GO:0048636	GO:0048636	positive regulation of muscle organ development	1/168	84/23210	0.457367	0.626221	0.600755	Adrb1	1	BP
GO:0060420	GO:0060420	regulation of heart growth	1/168	84/23210	0.457367	0.626221	0.600755	Adrb1	1	BP
GO:0016054	GO:0016054	organic acid catabolic process	2/168	213/23210	0.457515	0.626221	0.600755	Acmsd/Csad	2	BP
GO:0046395	GO:0046395	carboxylic acid catabolic process	2/168	213/23210	0.457515	0.626221	0.600755	Acmsd/Csad	2	BP
GO:0050707	GO:0050707	regulation of cytokine secretion	2/168	213/23210	0.457515	0.626221	0.600755	Bank1/Ptpn22	2	BP
GO:0008406	GO:0008406	gonad development	2/168	214/23210	0.45992	0.628651	0.603086	Afp/Fst	2	BP
GO:0048639	GO:0048639	positive regulation of developmental growth	2/168	214/23210	0.45992	0.628651	0.603086	Adrb1/Dio3	2	BP
GO:0032606	GO:0032606	type I interferon production	1/168	85/23210	0.461309	0.628829	0.603257	Ptpn22	1	BP
GO:0048708	GO:0048708	astrocyte differentiation	1/168	85/23210	0.461309	0.628829	0.603257	S100a8	1	BP
GO:0051384	GO:0051384	response to glucocorticoid	1/168	85/23210	0.461309	0.628829	0.603257	Hsd3b5	1	BP
GO:1901863	GO:1901863	positive regulation of muscle tissue development	1/168	85/23210	0.461309	0.628829	0.603257	Adrb1	1	BP
GO:0035265	GO:0035265	organ growth	2/168	215/23210	0.462319	0.629346	0.603753	Cacna1c/Adrb1	2	BP
GO:0045637	GO:0045637	regulation of myeloid cell differentiation	2/168	215/23210	0.462319	0.629346	0.603753	Ocstamp/Csf3r	2	BP
GO:0009636	GO:0009636	response to toxic substance	3/168	349/23210	0.464371	0.630292	0.60466	Adh4/Mt1/Mt2	3	BP
GO:1902903	GO:1902903	regulation of supramolecular fiber organization	3/168	349/23210	0.464371	0.630292	0.60466	S100a10/Prkcq/Tmod4	3	BP
GO:0007044	GO:0007044	cell-substrate junction assembly	1/168	86/23210	0.465223	0.630292	0.60466	S100a10	1	BP
GO:0042490	GO:0042490	mechanoreceptor differentiation	1/168	86/23210	0.465223	0.630292	0.60466	Mycl	1	BP
GO:0043648	GO:0043648	dicarboxylic acid metabolic process	1/168	86/23210	0.465223	0.630292	0.60466	Acmsd	1	BP
GO:0060079	GO:0060079	excitatory postsynaptic potential	1/168	86/23210	0.465223	0.630292	0.60466	Nlgn2	1	BP
GO:0150115	GO:0150115	cell-substrate junction organization	1/168	86/23210	0.465223	0.630292	0.60466	S100a10	1	BP
GO:0050806	GO:0050806	positive regulation of synaptic transmission	3/168	350/23210	0.466238	0.631239	0.605569	Adrb1/Baiap3/Nlgn2	3	BP
GO:0043547	GO:0043547	positive regulation of GTPase activity	2/168	217/23210	0.467098	0.631974	0.606274	S100a10/Adrb1	2	BP
GO:0002690	GO:0002690	positive regulation of leukocyte chemotaxis	1/168	87/23210	0.469108	0.632623	0.606897	Pla2g7	1	BP
GO:0072091	GO:0072091	regulation of stem cell proliferation	1/168	87/23210	0.469108	0.632623	0.606897	Dct	1	BP
GO:1901879	GO:1901879	regulation of protein depolymerization	1/168	87/23210	0.469108	0.632623	0.606897	Tmod4	1	BP
GO:0045137	GO:0045137	development of primary sexual characteristics	2/168	218/23210	0.469478	0.632623	0.606897	Afp/Fst	2	BP
GO:0051495	GO:0051495	positive regulation of cytoskeleton organization	2/168	218/23210	0.469478	0.632623	0.606897	S100a10/Prkcq	2	BP
GO:0070374	GO:0070374	positive regulation of ERK1 and ERK2 cascade	2/168	218/23210	0.469478	0.632623	0.606897	Nodal/Ptpn22	2	BP
GO:0051149	GO:0051149	positive regulation of muscle cell differentiation	1/168	88/23210	0.472965	0.636893	0.610992	Adrb1	1	BP
GO:0006302	GO:0006302	double-strand break repair	2/168	220/23210	0.474219	0.636896	0.610995	Dntt/Rad51b	2	BP
GO:0031348	GO:0031348	negative regulation of defense response	2/168	220/23210	0.474219	0.636896	0.610995	Susd4/Irak3	2	BP
GO:0006959	GO:0006959	humoral immune response	3/168	355/23210	0.47553	0.636896	0.610995	Susd4/Ighv8-8/Jchain	3	BP
GO:0099504	GO:0099504	synaptic vesicle cycle	2/168	221/23210	0.476581	0.636896	0.610995	Nlgn2/Syn1	2	BP
GO:0031016	GO:0031016	pancreas development	1/168	89/23210	0.476795	0.636896	0.610995	Onecut1	1	BP
GO:0031960	GO:0031960	response to corticosteroid	1/168	89/23210	0.476795	0.636896	0.610995	Hsd3b5	1	BP
GO:0051937	GO:0051937	catecholamine transport	1/168	89/23210	0.476795	0.636896	0.610995	Gck	1	BP
GO:0055072	GO:0055072	iron ion homeostasis	1/168	89/23210	0.476795	0.636896	0.610995	Scara5	1	BP
GO:0060415	GO:0060415	muscle tissue morphogenesis	1/168	89/23210	0.476795	0.636896	0.610995	Tnnc1	1	BP
GO:1903008	GO:1903008	organelle disassembly	1/168	89/23210	0.476795	0.636896	0.610995	Atpif1	1	BP
GO:1905954	GO:1905954	positive regulation of lipid localization	1/168	89/23210	0.476795	0.636896	0.610995	Fitm1	1	BP
GO:2000243	GO:2000243	positive regulation of reproductive process	1/168	89/23210	0.476795	0.636896	0.610995	Inhbb	1	BP
GO:0022411	GO:0022411	cellular component disassembly	3/168	357/23210	0.479226	0.639716	0.613701	Atpif1/Irak3/Tmod4	3	BP
GO:0032526	GO:0032526	response to retinoic acid	1/168	90/23210	0.480596	0.640261	0.614224	Ptk6	1	BP
GO:0072655	GO:0072655	establishment of protein localization to mitochondrion	1/168	90/23210	0.480596	0.640261	0.614224	Atpif1	1	BP
GO:1902600	GO:1902600	proton transmembrane transport	1/168	90/23210	0.480596	0.640261	0.614224	Atp4a	1	BP
GO:0050678	GO:0050678	regulation of epithelial cell proliferation	3/168	358/23210	0.48107	0.640322	0.614283	Atpif1/Cyp7b1/Nodal	3	BP
GO:0071241	GO:0071241	cellular response to inorganic substance	2/168	223/23210	0.481284	0.640322	0.614283	Mt1/Mt2	2	BP
GO:0016485	GO:0016485	protein processing	2/168	224/23210	0.483626	0.642716	0.616579	Ctse/Klk1	2	BP
GO:0009308	GO:0009308	amine metabolic process	1/168	91/23210	0.48437	0.642716	0.616579	Acmsd	1	BP
GO:0009798	GO:0009798	axis specification	1/168	91/23210	0.48437	0.642716	0.616579	Nodal	1	BP
GO:0046683	GO:0046683	response to organophosphorus	1/168	91/23210	0.48437	0.642716	0.616579	Dntt	1	BP
GO:0006650	GO:0006650	glycerophospholipid metabolic process	2/168	225/23210	0.485961	0.644399	0.618194	Etnk2/Pla2g7	2	BP
GO:0006885	GO:0006885	regulation of pH	1/168	92/23210	0.488117	0.646791	0.620489	Atp4a	1	BP
GO:0010976	GO:0010976	positive regulation of neuron projection development	3/168	362/23210	0.488413	0.646791	0.620489	D16Ertd472e/Ptk6/Nlgn2	3	BP
GO:0007215	GO:0007215	glutamate receptor signaling pathway	1/168	93/23210	0.491837	0.649603	0.623186	Nlgn2	1	BP
GO:0036473	GO:0036473	cell death in response to oxidative stress	1/168	93/23210	0.491837	0.649603	0.623186	Diablo	1	BP
GO:0043506	GO:0043506	regulation of JUN kinase activity	1/168	93/23210	0.491837	0.649603	0.623186	Ptpn22	1	BP
GO:0046889	GO:0046889	positive regulation of lipid biosynthetic process	1/168	93/23210	0.491837	0.649603	0.623186	Apoc3	1	BP
GO:1903320	GO:1903320	regulation of protein modification by small protein conjugation or removal	2/168	229/23210	0.495238	0.653184	0.626622	Cops9/Ptpn22	2	BP
GO:0045185	GO:0045185	maintenance of protein location	1/168	94/23210	0.49553	0.653184	0.626622	Cops9	1	BP
GO:0070555	GO:0070555	response to interleukin-1	1/168	94/23210	0.49553	0.653184	0.626622	Irak3	1	BP
GO:0001704	GO:0001704	formation of primary germ layer	1/168	95/23210	0.499197	0.656284	0.629596	Nodal	1	BP
GO:0007173	GO:0007173	epidermal growth factor receptor signaling pathway	1/168	95/23210	0.499197	0.656284	0.629596	Fam83a	1	BP
GO:0048477	GO:0048477	oogenesis	1/168	95/23210	0.499197	0.656284	0.629596	Inhbb	1	BP
GO:0070585	GO:0070585	protein localization to mitochondrion	1/168	95/23210	0.499197	0.656284	0.629596	Atpif1	1	BP
GO:0014066	GO:0014066	regulation of phosphatidylinositol 3-kinase signaling	1/168	96/23210	0.502837	0.659333	0.632521	Serpina12	1	BP
GO:0030004	GO:0030004	cellular monovalent inorganic cation homeostasis	1/168	96/23210	0.502837	0.659333	0.632521	Atp4a	1	BP
GO:0061053	GO:0061053	somite development	1/168	96/23210	0.502837	0.659333	0.632521	Rad51b	1	BP
GO:1901989	GO:1901989	positive regulation of cell cycle phase transition	1/168	96/23210	0.502837	0.659333	0.632521	Rad51b	1	BP
GO:0034764	GO:0034764	positive regulation of transmembrane transport	2/168	233/23210	0.504408	0.66096	0.634081	Cacna1c/Adrb1	2	BP
GO:0006119	GO:0006119	oxidative phosphorylation	1/168	97/23210	0.50645	0.661338	0.634444	Apoc3	1	BP
GO:0006304	GO:0006304	DNA modification	1/168	97/23210	0.50645	0.661338	0.634444	Dntt	1	BP
GO:0030510	GO:0030510	regulation of BMP signaling pathway	1/168	97/23210	0.50645	0.661338	0.634444	Fst	1	BP
GO:0048644	GO:0048644	muscle organ morphogenesis	1/168	97/23210	0.50645	0.661338	0.634444	Tnnc1	1	BP
GO:0072676	GO:0072676	lymphocyte migration	1/168	97/23210	0.50645	0.661338	0.634444	Cyp7b1	1	BP
GO:0051606	GO:0051606	detection of stimulus	2/168	234/23210	0.506684	0.661338	0.634444	Gnat1/Gck	2	BP
GO:0001505	GO:0001505	regulation of neurotransmitter levels	3/168	373/23210	0.508347	0.663075	0.636111	Baiap3/Phgdh/Syn1	3	BP
GO:0007006	GO:0007006	mitochondrial membrane organization	1/168	98/23210	0.510037	0.663679	0.63669	Atpif1	1	BP
GO:0021761	GO:0021761	limbic system development	1/168	98/23210	0.510037	0.663679	0.63669	Hsd3b5	1	BP
GO:0070227	GO:0070227	lymphocyte apoptotic process	1/168	98/23210	0.510037	0.663679	0.63669	Prkcq	1	BP
GO:0051480	GO:0051480	regulation of cytosolic calcium ion concentration	3/168	374/23210	0.510139	0.663679	0.63669	Cacna1c/Adrb1/Gck	3	BP
GO:0031330	GO:0031330	negative regulation of cellular catabolic process	2/168	237/23210	0.513471	0.666877	0.639758	Apoc3/Ptpn22	2	BP
GO:0033555	GO:0033555	multicellular organismal response to stress	1/168	99/23210	0.513599	0.666877	0.639758	Adrb1	1	BP
GO:0045639	GO:0045639	positive regulation of myeloid cell differentiation	1/168	99/23210	0.513599	0.666877	0.639758	Ocstamp	1	BP
GO:0000041	GO:0000041	transition metal ion transport	1/168	100/23210	0.517135	0.668174	0.641002	Scara5	1	BP
GO:0002702	GO:0002702	positive regulation of production of molecular mediator of immune response	1/168	100/23210	0.517135	0.668174	0.641002	Ptpn22	1	BP
GO:0007584	GO:0007584	response to nutrient	1/168	100/23210	0.517135	0.668174	0.641002	Dntt	1	BP
GO:0034440	GO:0034440	lipid oxidation	1/168	100/23210	0.517135	0.668174	0.641002	Pla2g7	1	BP
GO:0035418	GO:0035418	protein localization to synapse	1/168	100/23210	0.517135	0.668174	0.641002	Nlgn2	1	BP
GO:0035710	GO:0035710	CD4-positive, alpha-beta T cell activation	1/168	100/23210	0.517135	0.668174	0.641002	Prkcq	1	BP
GO:0055013	GO:0055013	cardiac muscle cell development	1/168	100/23210	0.517135	0.668174	0.641002	Adrb1	1	BP
GO:0042176	GO:0042176	regulation of protein catabolic process	3/168	378/23210	0.517274	0.668174	0.641002	Atpif1/Cyp51/Irak3	3	BP
GO:0003300	GO:0003300	cardiac muscle hypertrophy	1/168	101/23210	0.520645	0.669928	0.642684	Adrb1	1	BP
GO:0006022	GO:0006022	aminoglycan metabolic process	1/168	101/23210	0.520645	0.669928	0.642684	Itih5	1	BP
GO:0034446	GO:0034446	substrate adhesion-dependent cell spreading	1/168	101/23210	0.520645	0.669928	0.642684	S100a10	1	BP
GO:0050848	GO:0050848	regulation of calcium-mediated signaling	1/168	101/23210	0.520645	0.669928	0.642684	Itgal	1	BP
GO:0055024	GO:0055024	regulation of cardiac muscle tissue development	1/168	101/23210	0.520645	0.669928	0.642684	Adrb1	1	BP
GO:1901222	GO:1901222	regulation of NIK/NF-kappaB signaling	1/168	101/23210	0.520645	0.669928	0.642684	Ptpn22	1	BP
GO:0002367	GO:0002367	cytokine production involved in immune response	1/168	102/23210	0.52413	0.671815	0.644495	Irak3	1	BP
GO:0010522	GO:0010522	regulation of calcium ion transport into cytosol	1/168	102/23210	0.52413	0.671815	0.644495	Adrb1	1	BP
GO:0019218	GO:0019218	regulation of steroid metabolic process	1/168	102/23210	0.52413	0.671815	0.644495	Serpina12	1	BP
GO:0021510	GO:0021510	spinal cord development	1/168	102/23210	0.52413	0.671815	0.644495	Phgdh	1	BP
GO:0051897	GO:0051897	positive regulation of protein kinase B signaling	1/168	102/23210	0.52413	0.671815	0.644495	Mup1	1	BP
GO:1905477	GO:1905477	positive regulation of protein localization to membrane	1/168	102/23210	0.52413	0.671815	0.644495	Nlgn2	1	BP
GO:0001708	GO:0001708	cell fate specification	1/168	103/23210	0.52759	0.67495	0.647502	Nodal	1	BP
GO:0017015	GO:0017015	regulation of transforming growth factor beta receptor signaling pathway	1/168	103/23210	0.52759	0.67495	0.647502	Onecut1	1	BP
GO:0048709	GO:0048709	oligodendrocyte differentiation	1/168	103/23210	0.52759	0.67495	0.647502	Olig1	1	BP
GO:0050663	GO:0050663	cytokine secretion	2/168	244/23210	0.529068	0.676408	0.648901	Bank1/Ptpn22	2	BP
GO:0006413	GO:0006413	translational initiation	1/168	104/23210	0.531024	0.676769	0.649247	Bank1	1	BP
GO:0030101	GO:0030101	natural killer cell activation	1/168	104/23210	0.531024	0.676769	0.649247	Ptpn22	1	BP
GO:0006914	GO:0006914	autophagy	3/168	386/23210	0.531378	0.676769	0.649247	Atpif1/S100a8/Ptpn22	3	BP
GO:0030900	GO:0030900	forebrain development	3/168	386/23210	0.531378	0.676769	0.649247	D16Ertd472e/Dct/Hsd3b5	3	BP
GO:0061919	GO:0061919	process utilizing autophagic mechanism	3/168	386/23210	0.531378	0.676769	0.649247	Atpif1/S100a8/Ptpn22	3	BP
GO:0010721	GO:0010721	negative regulation of cell development	3/168	387/23210	0.533125	0.676769	0.649247	Nodal/Pitx3/Dio3	3	BP
GO:0008306	GO:0008306	associative learning	1/168	105/23210	0.534434	0.676769	0.649247	Cacna1c	1	BP
GO:0014897	GO:0014897	striated muscle hypertrophy	1/168	105/23210	0.534434	0.676769	0.649247	Adrb1	1	BP
GO:0035249	GO:0035249	synaptic transmission, glutamatergic	1/168	105/23210	0.534434	0.676769	0.649247	Nlgn2	1	BP
GO:0038127	GO:0038127	ERBB signaling pathway	1/168	105/23210	0.534434	0.676769	0.649247	Fam83a	1	BP
GO:0043266	GO:0043266	regulation of potassium ion transport	1/168	105/23210	0.534434	0.676769	0.649247	Gck	1	BP
GO:0043473	GO:0043473	pigmentation	1/168	105/23210	0.534434	0.676769	0.649247	Dct	1	BP
GO:0048704	GO:0048704	embryonic skeletal system morphogenesis	1/168	105/23210	0.534434	0.676769	0.649247	Nodal	1	BP
GO:0055017	GO:0055017	cardiac muscle tissue growth	1/168	105/23210	0.534434	0.676769	0.649247	Adrb1	1	BP
GO:1903844	GO:1903844	regulation of cellular response to transforming growth factor beta stimulus	1/168	105/23210	0.534434	0.676769	0.649247	Onecut1	1	BP
GO:0007568	GO:0007568	aging	2/168	247/23210	0.535649	0.677877	0.650311	Acmsd/Aldoc	2	BP
GO:0046474	GO:0046474	glycerophospholipid biosynthetic process	1/168	106/23210	0.537819	0.678486	0.650894	Etnk2	1	BP
GO:0051668	GO:0051668	localization within membrane	1/168	106/23210	0.537819	0.678486	0.650894	Itgal	1	BP
GO:0055006	GO:0055006	cardiac cell development	1/168	106/23210	0.537819	0.678486	0.650894	Adrb1	1	BP
GO:0120034	GO:0120034	positive regulation of plasma membrane bounded cell projection assembly	1/168	106/23210	0.537819	0.678486	0.650894	Prkcq	1	BP
GO:0010506	GO:0010506	regulation of autophagy	2/168	248/23210	0.537828	0.678486	0.650894	Atpif1/Ptpn22	2	BP
GO:0014074	GO:0014074	response to purine-containing compound	1/168	107/23210	0.54118	0.681423	0.653712	Dntt	1	BP
GO:0014896	GO:0014896	muscle hypertrophy	1/168	107/23210	0.54118	0.681423	0.653712	Adrb1	1	BP
GO:0038061	GO:0038061	NIK/NF-kappaB signaling	1/168	107/23210	0.54118	0.681423	0.653712	Ptpn22	1	BP
GO:0099003	GO:0099003	vesicle-mediated transport in synapse	2/168	250/23210	0.542167	0.682235	0.654491	Nlgn2/Syn1	2	BP
GO:0001959	GO:0001959	regulation of cytokine-mediated signaling pathway	1/168	108/23210	0.544516	0.68304	0.655263	Irak3	1	BP
GO:0030316	GO:0030316	osteoclast differentiation	1/168	108/23210	0.544516	0.68304	0.655263	Ocstamp	1	BP
GO:0035725	GO:0035725	sodium ion transmembrane transport	1/168	108/23210	0.544516	0.68304	0.655263	Atp4a	1	BP
GO:0051028	GO:0051028	mRNA transport	1/168	108/23210	0.544516	0.68304	0.655263	Sarnp	1	BP
GO:2000106	GO:2000106	regulation of leukocyte apoptotic process	1/168	108/23210	0.544516	0.68304	0.655263	Prkcq	1	BP
GO:0019439	GO:0019439	aromatic compound catabolic process	3/168	394/23210	0.545251	0.683532	0.655735	Acmsd/Dctpp1/Dio3	3	BP
GO:0009314	GO:0009314	response to radiation	3/168	395/23210	0.546968	0.684186	0.656363	Cacna1c/Cops9/Gnat1	3	BP
GO:0009141	GO:0009141	nucleoside triphosphate metabolic process	1/168	109/23210	0.547829	0.684186	0.656363	Dctpp1	1	BP
GO:0015844	GO:0015844	monoamine transport	1/168	109/23210	0.547829	0.684186	0.656363	Gck	1	BP
GO:0032649	GO:0032649	regulation of interferon-gamma production	1/168	109/23210	0.547829	0.684186	0.656363	Ptpn22	1	BP
GO:0034968	GO:0034968	histone lysine methylation	1/168	109/23210	0.547829	0.684186	0.656363	Setd7	1	BP
GO:0050829	GO:0050829	defense response to Gram-negative bacterium	1/168	109/23210	0.547829	0.684186	0.656363	Dmbt1	1	BP
GO:0051090	GO:0051090	regulation of DNA-binding transcription factor activity	3/168	396/23210	0.548682	0.684824	0.656974	Nodal/Irak3/Prkcq	3	BP
GO:0032412	GO:0032412	regulation of ion transmembrane transporter activity	2/168	254/23210	0.550759	0.686986	0.659049	Adrb1/Nlgn2	2	BP
GO:0019882	GO:0019882	antigen processing and presentation	1/168	110/23210	0.551117	0.687004	0.659066	Ctse	1	BP
GO:0002688	GO:0002688	regulation of leukocyte chemotaxis	1/168	111/23210	0.554382	0.689782	0.661731	Pla2g7	1	BP
GO:0007127	GO:0007127	meiosis I	1/168	111/23210	0.554382	0.689782	0.661731	Brdt	1	BP
GO:0008637	GO:0008637	apoptotic mitochondrial changes	1/168	111/23210	0.554382	0.689782	0.661731	Atpif1	1	BP
GO:0045055	GO:0045055	regulated exocytosis	2/168	256/23210	0.555012	0.690137	0.662072	Cacna1c/Baiap3	2	BP
GO:0007015	GO:0007015	actin filament organization	3/168	400/23210	0.555499	0.690312	0.66224	S100a10/Prkcq/Tmod4	3	BP
GO:0030099	GO:0030099	myeloid cell differentiation	3/168	401/23210	0.557194	0.691558	0.663435	Atpif1/Ocstamp/Csf3r	3	BP
GO:0048638	GO:0048638	regulation of developmental growth	3/168	401/23210	0.557194	0.691558	0.663435	Cacna1c/Adrb1/Dio3	3	BP
GO:0031398	GO:0031398	positive regulation of protein ubiquitination	1/168	112/23210	0.557623	0.69166	0.663533	Ptpn22	1	BP
GO:0045926	GO:0045926	negative regulation of growth	2/168	258/23210	0.559238	0.692803	0.664629	Ptk6/Adrb1	2	BP
GO:1901990	GO:1901990	regulation of mitotic cell cycle phase transition	2/168	258/23210	0.559238	0.692803	0.664629	Prkcq/Rad51b	2	BP
GO:0032103	GO:0032103	positive regulation of response to external stimulus	3/168	403/23210	0.560572	0.694025	0.665802	S100a8/Cd6/Pla2g7	3	BP
GO:0016050	GO:0016050	vesicle organization	2/168	259/23210	0.56134	0.694115	0.665888	S100a10/Baiap3	2	BP
GO:0016064	GO:0016064	immunoglobulin mediated immune response	2/168	259/23210	0.56134	0.694115	0.665888	Susd4/Ighv8-8	2	BP
GO:0048738	GO:0048738	cardiac muscle tissue development	2/168	260/23210	0.563435	0.695295	0.667019	Tnnc1/Adrb1	2	BP
GO:0042113	GO:0042113	B cell activation	3/168	405/23210	0.563935	0.695295	0.667019	Onecut1/Bank1/Ighv8-8	3	BP
GO:0072594	GO:0072594	establishment of protein localization to organelle	3/168	405/23210	0.563935	0.695295	0.667019	Atpif1/Prkcq/Ptpn22	3	BP
GO:0032414	GO:0032414	positive regulation of ion transmembrane transporter activity	1/168	114/23210	0.564035	0.695295	0.667019	Adrb1	1	BP
GO:0060419	GO:0060419	heart growth	1/168	114/23210	0.564035	0.695295	0.667019	Adrb1	1	BP
GO:0019730	GO:0019730	antimicrobial humoral response	1/168	115/23210	0.567206	0.697911	0.66953	Jchain	1	BP
GO:0071346	GO:0071346	cellular response to interferon-gamma	1/168	115/23210	0.567206	0.697911	0.66953	Gbp8	1	BP
GO:1902414	GO:1902414	protein localization to cell junction	1/168	115/23210	0.567206	0.697911	0.66953	Nlgn2	1	BP
GO:0022898	GO:0022898	regulation of transmembrane transporter activity	2/168	262/23210	0.567603	0.69797	0.669586	Adrb1/Nlgn2	2	BP
GO:0019724	GO:0019724	B cell mediated immunity	2/168	263/23210	0.569677	0.698771	0.670355	Susd4/Ighv8-8	2	BP
GO:0010927	GO:0010927	cellular component assembly involved in morphogenesis	1/168	116/23210	0.570354	0.698771	0.670355	Tmod4	1	BP
GO:0051261	GO:0051261	protein depolymerization	1/168	116/23210	0.570354	0.698771	0.670355	Tmod4	1	BP
GO:0051952	GO:0051952	regulation of amine transport	1/168	116/23210	0.570354	0.698771	0.670355	Gck	1	BP
GO:0061982	GO:0061982	meiosis I cell cycle process	1/168	116/23210	0.570354	0.698771	0.670355	Brdt	1	BP
GO:1903052	GO:1903052	positive regulation of proteolysis involved in cellular protein catabolic process	1/168	116/23210	0.570354	0.698771	0.670355	Atpif1	1	BP
GO:0043523	GO:0043523	regulation of neuron apoptotic process	2/168	264/23210	0.571743	0.699615	0.671164	Mt1/Pitx3	2	BP
GO:0050864	GO:0050864	regulation of B cell activation	2/168	264/23210	0.571743	0.699615	0.671164	Bank1/Ighv8-8	2	BP
GO:0007498	GO:0007498	mesoderm development	1/168	117/23210	0.57348	0.700881	0.672378	Nodal	1	BP
GO:0014020	GO:0014020	primary neural tube formation	1/168	117/23210	0.57348	0.700881	0.672378	Nodal	1	BP
GO:0060759	GO:0060759	regulation of response to cytokine stimulus	1/168	118/23210	0.576583	0.704242	0.675603	Irak3	1	BP
GO:0008037	GO:0008037	cell recognition	2/168	267/23210	0.577899	0.705419	0.676732	Cd6/Ighv8-8	2	BP
GO:2001233	GO:2001233	regulation of apoptotic signaling pathway	3/168	414/23210	0.578874	0.705749	0.677049	Atpif1/S100a8/Inhbb	3	BP
GO:0050868	GO:0050868	negative regulation of T cell activation	1/168	119/23210	0.579663	0.705749	0.677049	Ptpn22	1	BP
GO:0051963	GO:0051963	regulation of synapse assembly	1/168	119/23210	0.579663	0.705749	0.677049	Nlgn2	1	BP
GO:2000278	GO:2000278	regulation of DNA biosynthetic process	1/168	119/23210	0.579663	0.705749	0.677049	Prkcq	1	BP
GO:0009615	GO:0009615	response to virus	2/168	268/23210	0.579937	0.705749	0.677049	Irak3/Ptpn22	2	BP
GO:0002366	GO:0002366	leukocyte activation involved in immune response	2/168	269/23210	0.581968	0.706983	0.678233	Apbb1ip/Itgal	2	BP
GO:0015837	GO:0015837	amine transport	1/168	120/23210	0.582721	0.706983	0.678233	Gck	1	BP
GO:0046434	GO:0046434	organophosphate catabolic process	1/168	120/23210	0.582721	0.706983	0.678233	Dctpp1	1	BP
GO:1901136	GO:1901136	carbohydrate derivative catabolic process	1/168	120/23210	0.582721	0.706983	0.678233	Dctpp1	1	BP
GO:1901216	GO:1901216	positive regulation of neuron death	1/168	120/23210	0.582721	0.706983	0.678233	Pitx3	1	BP
GO:0006611	GO:0006611	protein export from nucleus	1/168	121/23210	0.585757	0.709676	0.680817	Sarnp	1	BP
GO:0032411	GO:0032411	positive regulation of transporter activity	1/168	121/23210	0.585757	0.709676	0.680817	Adrb1	1	BP
GO:0090287	GO:0090287	regulation of cellular response to growth factor stimulus	2/168	271/23210	0.586007	0.709676	0.680817	Fst/Onecut1	2	BP
GO:0031349	GO:0031349	positive regulation of defense response	2/168	272/23210	0.588016	0.71001	0.681136	S100a8/Cd6	2	BP
GO:0032409	GO:0032409	regulation of transporter activity	2/168	272/23210	0.588016	0.71001	0.681136	Adrb1/Nlgn2	2	BP
GO:0034504	GO:0034504	protein localization to nucleus	2/168	272/23210	0.588016	0.71001	0.681136	Prkcq/Ptpn22	2	BP
GO:0008277	GO:0008277	regulation of G protein-coupled receptor signaling pathway	1/168	122/23210	0.588771	0.71001	0.681136	Adrb1	1	BP
GO:0010508	GO:0010508	positive regulation of autophagy	1/168	122/23210	0.588771	0.71001	0.681136	Atpif1	1	BP
GO:0018022	GO:0018022	peptidyl-lysine methylation	1/168	122/23210	0.588771	0.71001	0.681136	Setd7	1	BP
GO:0032609	GO:0032609	interferon-gamma production	1/168	122/23210	0.588771	0.71001	0.681136	Ptpn22	1	BP
GO:0002263	GO:0002263	cell activation involved in immune response	2/168	273/23210	0.590018	0.71096	0.682048	Apbb1ip/Itgal	2	BP
GO:0090407	GO:0090407	organophosphate biosynthetic process	3/168	421/23210	0.590271	0.71096	0.682048	Etnk2/Fitm1/Idi1	3	BP
GO:0051153	GO:0051153	regulation of striated muscle cell differentiation	1/168	123/23210	0.591764	0.712043	0.683086	Adrb1	1	BP
GO:0002697	GO:0002697	regulation of immune effector process	3/168	422/23210	0.591883	0.712043	0.683086	Susd4/Irak3/Ptpn22	3	BP
GO:0000723	GO:0000723	telomere maintenance	1/168	124/23210	0.594734	0.714612	0.685551	Prkcq	1	BP
GO:0033138	GO:0033138	positive regulation of peptidyl-serine phosphorylation	1/168	124/23210	0.594734	0.714612	0.685551	Gfra2	1	BP
GO:1901361	GO:1901361	organic cyclic compound catabolic process	3/168	424/23210	0.595095	0.714615	0.685554	Acmsd/Dctpp1/Dio3	3	BP
GO:0002761	GO:0002761	regulation of myeloid leukocyte differentiation	1/168	125/23210	0.597683	0.717292	0.688122	Ocstamp	1	BP
GO:0035690	GO:0035690	cellular response to drug	3/168	427/23210	0.599882	0.718646	0.689422	Chrm3/Ppp1r14a/Ptpn22	3	BP
GO:0071900	GO:0071900	regulation of protein serine/threonine kinase activity	3/168	427/23210	0.599882	0.718646	0.689422	Irak3/Pik3r5/Ptpn22	3	BP
GO:0071229	GO:0071229	cellular response to acid chemical	2/168	278/23210	0.59992	0.718646	0.689422	Ptk6/S100a10	2	BP
GO:0009582	GO:0009582	detection of abiotic stimulus	1/168	126/23210	0.600611	0.718646	0.689422	Gnat1	1	BP
GO:0032200	GO:0032200	telomere organization	1/168	126/23210	0.600611	0.718646	0.689422	Prkcq	1	BP
GO:0072659	GO:0072659	protein localization to plasma membrane	2/168	279/23210	0.601879	0.719051	0.68981	Fyb2/S100a10	2	BP
GO:0015711	GO:0015711	organic anion transport	3/168	429/23210	0.603054	0.719051	0.68981	Slc22a7/Slc43a1/Slco1a1	3	BP
GO:0000724	GO:0000724	double-strand break repair via homologous recombination	1/168	127/23210	0.603518	0.719051	0.68981	Rad51b	1	BP
GO:0000725	GO:0000725	recombinational repair	1/168	127/23210	0.603518	0.719051	0.68981	Rad51b	1	BP
GO:0009581	GO:0009581	detection of external stimulus	1/168	127/23210	0.603518	0.719051	0.68981	Gnat1	1	BP
GO:0010811	GO:0010811	positive regulation of cell-substrate adhesion	1/168	127/23210	0.603518	0.719051	0.68981	S100a10	1	BP
GO:0048640	GO:0048640	negative regulation of developmental growth	1/168	127/23210	0.603518	0.719051	0.68981	Adrb1	1	BP
GO:0003007	GO:0003007	heart morphogenesis	2/168	280/23210	0.60383	0.719051	0.68981	Nodal/Tnnc1	2	BP
GO:0071222	GO:0071222	cellular response to lipopolysaccharide	2/168	282/23210	0.607712	0.723242	0.693831	Cd6/Ptpn22	2	BP
GO:0001936	GO:0001936	regulation of endothelial cell proliferation	1/168	129/23210	0.609268	0.723801	0.694366	Atpif1	1	BP
GO:0010469	GO:0010469	regulation of signaling receptor activity	1/168	129/23210	0.609268	0.723801	0.694366	Nlgn2	1	BP
GO:0045995	GO:0045995	regulation of embryonic development	1/168	129/23210	0.609268	0.723801	0.694366	Nodal	1	BP
GO:0051604	GO:0051604	protein maturation	2/168	284/23210	0.611565	0.726097	0.696569	Ctse/Klk1	2	BP
GO:0030218	GO:0030218	erythrocyte differentiation	1/168	131/23210	0.614936	0.729232	0.699577	Atpif1	1	BP
GO:1903038	GO:1903038	negative regulation of leukocyte cell-cell adhesion	1/168	131/23210	0.614936	0.729232	0.699577	Ptpn22	1	BP
GO:0043414	GO:0043414	macromolecule methylation	2/168	286/23210	0.615389	0.729336	0.699677	Ntmt1/Setd7	2	BP
GO:0001508	GO:0001508	action potential	1/168	132/23210	0.617739	0.73082	0.7011	Cacna1c	1	BP
GO:0001841	GO:0001841	neural tube formation	1/168	132/23210	0.617739	0.73082	0.7011	Nodal	1	BP
GO:0071887	GO:0071887	leukocyte apoptotic process	1/168	132/23210	0.617739	0.73082	0.7011	Prkcq	1	BP
GO:0007548	GO:0007548	sex differentiation	2/168	288/23210	0.619184	0.731944	0.702179	Afp/Fst	2	BP
GO:0006261	GO:0006261	DNA-dependent DNA replication	1/168	133/23210	0.620522	0.731944	0.702179	Mcm10	1	BP
GO:0010821	GO:0010821	regulation of mitochondrion organization	1/168	133/23210	0.620522	0.731944	0.702179	Atpif1	1	BP
GO:0046928	GO:0046928	regulation of neurotransmitter secretion	1/168	133/23210	0.620522	0.731944	0.702179	Baiap3	1	BP
GO:0050906	GO:0050906	detection of stimulus involved in sensory perception	1/168	133/23210	0.620522	0.731944	0.702179	Gnat1	1	BP
GO:1901987	GO:1901987	regulation of cell cycle phase transition	2/168	289/23210	0.621071	0.73216	0.702386	Prkcq/Rad51b	2	BP
GO:0071219	GO:0071219	cellular response to molecule of bacterial origin	2/168	290/23210	0.622951	0.73347	0.703642	Cd6/Ptpn22	2	BP
GO:0006633	GO:0006633	fatty acid biosynthetic process	1/168	134/23210	0.623284	0.73347	0.703642	Elovl3	1	BP
GO:1903322	GO:1903322	positive regulation of protein modification by small protein conjugation or removal	1/168	134/23210	0.623284	0.73347	0.703642	Ptpn22	1	BP
GO:0022412	GO:0022412	cellular process involved in reproduction in multicellular organism	3/168	443/23210	0.624789	0.733847	0.704005	Brdt/Xlr4a/Inhbb	3	BP
GO:0051168	GO:0051168	nuclear export	1/168	135/23210	0.626027	0.733847	0.704005	Sarnp	1	BP
GO:1903364	GO:1903364	positive regulation of cellular protein catabolic process	1/168	135/23210	0.626027	0.733847	0.704005	Atpif1	1	BP
GO:0071214	GO:0071214	cellular response to abiotic stimulus	2/168	292/23210	0.62669	0.733847	0.704005	Cops9/Gnat1	2	BP
GO:0097193	GO:0097193	intrinsic apoptotic signaling pathway	2/168	292/23210	0.62669	0.733847	0.704005	Diablo/S100a8	2	BP
GO:0104004	GO:0104004	cellular response to environmental stimulus	2/168	292/23210	0.62669	0.733847	0.704005	Cops9/Gnat1	2	BP
GO:0009791	GO:0009791	post-embryonic development	1/168	136/23210	0.62875	0.733847	0.704005	Etnk2	1	BP
GO:0017148	GO:0017148	negative regulation of translation	1/168	136/23210	0.62875	0.733847	0.704005	Bank1	1	BP
GO:0031333	GO:0031333	negative regulation of protein-containing complex assembly	1/168	136/23210	0.62875	0.733847	0.704005	Tmod4	1	BP
GO:0035270	GO:0035270	endocrine system development	1/168	136/23210	0.62875	0.733847	0.704005	Onecut1	1	BP
GO:0043624	GO:0043624	cellular protein complex disassembly	1/168	136/23210	0.62875	0.733847	0.704005	Tmod4	1	BP
GO:0050905	GO:0050905	neuromuscular process	1/168	136/23210	0.62875	0.733847	0.704005	Nlgn2	1	BP
GO:0097306	GO:0097306	cellular response to alcohol	1/168	136/23210	0.62875	0.733847	0.704005	Inhbb	1	BP
GO:0097553	GO:0097553	calcium ion transmembrane import into cytosol	1/168	136/23210	0.62875	0.733847	0.704005	Adrb1	1	BP
GO:0016358	GO:0016358	dendrite development	2/168	294/23210	0.630399	0.735283	0.705382	D16Ertd472e/Nlgn2	2	BP
GO:0009411	GO:0009411	response to UV	1/168	137/23210	0.631453	0.735283	0.705382	Cops9	1	BP
GO:0034341	GO:0034341	response to interferon-gamma	1/168	137/23210	0.631453	0.735283	0.705382	Gbp8	1	BP
GO:0034728	GO:0034728	nucleosome organization	1/168	137/23210	0.631453	0.735283	0.705382	Brdt	1	BP
GO:0043484	GO:0043484	regulation of RNA splicing	1/168	139/23210	0.6368	0.740646	0.710527	Brdt	1	BP
GO:0048706	GO:0048706	embryonic skeletal system development	1/168	139/23210	0.6368	0.740646	0.710527	Nodal	1	BP
GO:0006836	GO:0006836	neurotransmitter transport	2/168	298/23210	0.637733	0.741299	0.711154	Baiap3/Syn1	2	BP
GO:0002824	GO:0002824	positive regulation of adaptive immune response based on somatic recombination of immune receptors built from immunoglobulin superfamily domains	1/168	140/23210	0.639445	0.741683	0.711522	Prkcq	1	BP
GO:0050921	GO:0050921	positive regulation of chemotaxis	1/168	140/23210	0.639445	0.741683	0.711522	Pla2g7	1	BP
GO:0072089	GO:0072089	stem cell proliferation	1/168	140/23210	0.639445	0.741683	0.711522	Dct	1	BP
GO:0046942	GO:0046942	carboxylic acid transport	2/168	299/23210	0.639548	0.741683	0.711522	Slc43a1/Slco1a1	2	BP
GO:0035637	GO:0035637	multicellular organismal signaling	1/168	141/23210	0.642071	0.743744	0.713499	Cacna1c	1	BP
GO:0061041	GO:0061041	regulation of wound healing	1/168	141/23210	0.642071	0.743744	0.713499	Prkcq	1	BP
GO:0034101	GO:0034101	erythrocyte homeostasis	1/168	142/23210	0.644677	0.745437	0.715123	Atpif1	1	BP
GO:0050680	GO:0050680	negative regulation of epithelial cell proliferation	1/168	142/23210	0.644677	0.745437	0.715123	Atpif1	1	BP
GO:0015849	GO:0015849	organic acid transport	2/168	302/23210	0.644953	0.745437	0.715123	Slc43a1/Slco1a1	2	BP
GO:0015672	GO:0015672	monovalent inorganic cation transport	3/168	458/23210	0.647166	0.745437	0.715123	Atp4a/Gck/Kcnj9	3	BP
GO:0001935	GO:0001935	endothelial cell proliferation	1/168	143/23210	0.647265	0.745437	0.715123	Atpif1	1	BP
GO:0007224	GO:0007224	smoothened signaling pathway	1/168	143/23210	0.647265	0.745437	0.715123	Nsdhl	1	BP
GO:0030326	GO:0030326	embryonic limb morphogenesis	1/168	143/23210	0.647265	0.745437	0.715123	Cacna1c	1	BP
GO:0035113	GO:0035113	embryonic appendage morphogenesis	1/168	143/23210	0.647265	0.745437	0.715123	Cacna1c	1	BP
GO:0055007	GO:0055007	cardiac muscle cell differentiation	1/168	143/23210	0.647265	0.745437	0.715123	Adrb1	1	BP
GO:0090288	GO:0090288	negative regulation of cellular response to growth factor stimulus	1/168	143/23210	0.647265	0.745437	0.715123	Onecut1	1	BP
GO:0002687	GO:0002687	positive regulation of leukocyte migration	1/168	144/23210	0.649834	0.747534	0.717134	Pla2g7	1	BP
GO:0018393	GO:0018393	internal peptidyl-lysine acetylation	1/168	144/23210	0.649834	0.747534	0.717134	Nat8	1	BP
GO:0016042	GO:0016042	lipid catabolic process	2/168	306/23210	0.652059	0.74923	0.718762	Apoc3/Pla2g7	2	BP
GO:0070372	GO:0070372	regulation of ERK1 and ERK2 cascade	2/168	306/23210	0.652059	0.74923	0.718762	Nodal/Ptpn22	2	BP
GO:0006865	GO:0006865	amino acid transport	1/168	146/23210	0.654916	0.75208	0.721496	Slc43a1	1	BP
GO:0045927	GO:0045927	positive regulation of growth	2/168	308/23210	0.65557	0.752371	0.721775	Adrb1/Dio3	2	BP
GO:0002821	GO:0002821	positive regulation of adaptive immune response	1/168	147/23210	0.65743	0.752371	0.721775	Prkcq	1	BP
GO:0006475	GO:0006475	internal protein amino acid acetylation	1/168	147/23210	0.65743	0.752371	0.721775	Nat8	1	BP
GO:0016482	GO:0016482	cytosolic transport	1/168	147/23210	0.65743	0.752371	0.721775	Baiap3	1	BP
GO:0042133	GO:0042133	neurotransmitter metabolic process	1/168	147/23210	0.65743	0.752371	0.721775	Phgdh	1	BP
GO:1902904	GO:1902904	negative regulation of supramolecular fiber organization	1/168	147/23210	0.65743	0.752371	0.721775	Tmod4	1	BP
GO:0003206	GO:0003206	cardiac chamber morphogenesis	1/168	148/23210	0.659925	0.752878	0.722262	Tnnc1	1	BP
GO:0003231	GO:0003231	cardiac ventricle development	1/168	148/23210	0.659925	0.752878	0.722262	Tnnc1	1	BP
GO:0050657	GO:0050657	nucleic acid transport	1/168	148/23210	0.659925	0.752878	0.722262	Sarnp	1	BP
GO:0050658	GO:0050658	RNA transport	1/168	148/23210	0.659925	0.752878	0.722262	Sarnp	1	BP
GO:0055067	GO:0055067	monovalent inorganic cation homeostasis	1/168	148/23210	0.659925	0.752878	0.722262	Atp4a	1	BP
GO:0048732	GO:0048732	gland development	3/168	467/23210	0.660135	0.752878	0.722262	Cyp7b1/Nodal/Onecut1	3	BP
GO:0007389	GO:0007389	pattern specification process	3/168	468/23210	0.661555	0.754067	0.723402	Fst/Nat8f5/Nodal	3	BP
GO:0030183	GO:0030183	B cell differentiation	1/168	149/23210	0.662403	0.754602	0.723916	Onecut1	1	BP
GO:0071216	GO:0071216	cellular response to biotic stimulus	2/168	313/23210	0.664224	0.75568	0.724949	Cd6/Ptpn22	2	BP
GO:0014013	GO:0014013	regulation of gliogenesis	1/168	150/23210	0.664862	0.75568	0.724949	Pitx3	1	BP
GO:0022612	GO:0022612	gland morphogenesis	1/168	150/23210	0.664862	0.75568	0.724949	Cyp7b1	1	BP
GO:0050715	GO:0050715	positive regulation of cytokine secretion	1/168	150/23210	0.664862	0.75568	0.724949	Ptpn22	1	BP
GO:0051321	GO:0051321	meiotic cell cycle	2/168	314/23210	0.665934	0.756468	0.725705	Brdt/Xlr4a	2	BP
GO:0006910	GO:0006910	phagocytosis, recognition	1/168	151/23210	0.667304	0.756732	0.725959	Ighv8-8	1	BP
GO:0015718	GO:0015718	monocarboxylic acid transport	1/168	151/23210	0.667304	0.756732	0.725959	Slco1a1	1	BP
GO:0051236	GO:0051236	establishment of RNA localization	1/168	151/23210	0.667304	0.756732	0.725959	Sarnp	1	BP
GO:0006874	GO:0006874	cellular calcium ion homeostasis	3/168	473/23210	0.66859	0.757761	0.726946	Cacna1c/Adrb1/Gck	3	BP
GO:0051146	GO:0051146	striated muscle cell differentiation	2/168	316/23210	0.669333	0.758173	0.72734	Adrb1/Tmod4	2	BP
GO:0042737	GO:0042737	drug catabolic process	1/168	152/23210	0.669728	0.758189	0.727357	Sult1b1	1	BP
GO:0031056	GO:0031056	regulation of histone modification	1/168	153/23210	0.672134	0.760482	0.729556	Setd7	1	BP
GO:0018105	GO:0018105	peptidyl-serine phosphorylation	2/168	318/23210	0.672704	0.760697	0.729762	Gfra2/Prkcq	2	BP
GO:0001838	GO:0001838	embryonic epithelial tube formation	1/168	154/23210	0.674523	0.76189	0.730907	Nodal	1	BP
GO:0034249	GO:0034249	negative regulation of cellular amide metabolic process	1/168	154/23210	0.674523	0.76189	0.730907	Bank1	1	BP
GO:0018394	GO:0018394	peptidyl-lysine acetylation	1/168	155/23210	0.676894	0.763274	0.732234	Nat8	1	BP
GO:0021543	GO:0021543	pallium development	1/168	155/23210	0.676894	0.763274	0.732234	Hsd3b5	1	BP
GO:0051494	GO:0051494	negative regulation of cytoskeleton organization	1/168	155/23210	0.676894	0.763274	0.732234	Tmod4	1	BP
GO:0007596	GO:0007596	blood coagulation	1/168	156/23210	0.679249	0.765194	0.734076	Prkcq	1	BP
GO:0043270	GO:0043270	positive regulation of ion transport	2/168	322/23210	0.679363	0.765194	0.734076	Cacna1c/Adrb1	2	BP
GO:0070371	GO:0070371	ERK1 and ERK2 cascade	2/168	323/23210	0.681011	0.766401	0.735234	Nodal/Ptpn22	2	BP
GO:0033135	GO:0033135	regulation of peptidyl-serine phosphorylation	1/168	157/23210	0.681586	0.766401	0.735234	Gfra2	1	BP
GO:0060402	GO:0060402	calcium ion transport into cytosol	1/168	157/23210	0.681586	0.766401	0.735234	Adrb1	1	BP
GO:0002244	GO:0002244	hematopoietic progenitor cell differentiation	1/168	158/23210	0.683907	0.768145	0.736907	Fst	1	BP
GO:0007599	GO:0007599	hemostasis	1/168	158/23210	0.683907	0.768145	0.736907	Prkcq	1	BP
GO:0030833	GO:0030833	regulation of actin filament polymerization	1/168	159/23210	0.68621	0.769866	0.738559	Tmod4	1	BP
GO:0050817	GO:0050817	coagulation	1/168	159/23210	0.68621	0.769866	0.738559	Prkcq	1	BP
GO:0007565	GO:0007565	female pregnancy	1/168	160/23210	0.688497	0.7707	0.739359	Nodal	1	BP
GO:0031214	GO:0031214	biomineral tissue development	1/168	160/23210	0.688497	0.7707	0.739359	Cnnm4	1	BP
GO:0043433	GO:0043433	negative regulation of DNA-binding transcription factor activity	1/168	160/23210	0.688497	0.7707	0.739359	Irak3	1	BP
GO:0110148	GO:0110148	biomineralization	1/168	160/23210	0.688497	0.7707	0.739359	Cnnm4	1	BP
GO:0120031	GO:0120031	plasma membrane bounded cell projection assembly	3/168	488/23210	0.689058	0.770896	0.739547	Onecut1/Fgd3/Prkcq	3	BP
GO:0055074	GO:0055074	calcium ion homeostasis	3/168	489/23210	0.690389	0.771512	0.740137	Cacna1c/Adrb1/Gck	3	BP
GO:0051147	GO:0051147	regulation of muscle cell differentiation	1/168	161/23210	0.690768	0.771512	0.740137	Adrb1	1	BP
GO:0072175	GO:0072175	epithelial tube formation	1/168	161/23210	0.690768	0.771512	0.740137	Nodal	1	BP
GO:0071356	GO:0071356	cellular response to tumor necrosis factor	1/168	162/23210	0.693022	0.773597	0.742137	Ocstamp	1	BP
GO:0006338	GO:0006338	chromatin remodeling	1/168	163/23210	0.695259	0.77553	0.743992	Brdt	1	BP
GO:0006417	GO:0006417	regulation of translation	2/168	332/23210	0.695531	0.77553	0.743992	Sarnp/Bank1	2	BP
GO:0010035	GO:0010035	response to inorganic substance	3/168	494/23210	0.696978	0.776711	0.745125	Mt1/Mt2/Tnnc1	3	BP
GO:0045333	GO:0045333	cellular respiration	1/168	164/23210	0.697481	0.776837	0.745246	Mup1	1	BP
GO:0007051	GO:0007051	spindle organization	1/168	165/23210	0.699686	0.777992	0.746354	Ntmt1	1	BP
GO:0019827	GO:0019827	stem cell population maintenance	1/168	165/23210	0.699686	0.777992	0.746354	Nodal	1	BP
GO:0046425	GO:0046425	regulation of receptor signaling pathway via JAK-STAT	1/168	165/23210	0.699686	0.777992	0.746354	Gfra2	1	BP
GO:0006909	GO:0006909	phagocytosis	2/168	336/23210	0.701808	0.779558	0.747856	Ighv8-8/Itgal	2	BP
GO:0045931	GO:0045931	positive regulation of mitotic cell cycle	1/168	166/23210	0.701875	0.779558	0.747856	Rad51b	1	BP
GO:0050768	GO:0050768	negative regulation of neurogenesis	2/168	337/23210	0.70336	0.780773	0.749022	Pitx3/Dio3	2	BP
GO:0071897	GO:0071897	DNA biosynthetic process	1/168	167/23210	0.704049	0.781103	0.749338	Prkcq	1	BP
GO:1902107	GO:1902107	positive regulation of leukocyte differentiation	1/168	168/23210	0.706206	0.782892	0.751055	Ocstamp	1	BP
GO:0007281	GO:0007281	germ cell development	2/168	339/23210	0.706445	0.782892	0.751055	Xlr4a/Inhbb	2	BP
GO:0050727	GO:0050727	regulation of inflammatory response	2/168	340/23210	0.707978	0.783696	0.751826	S100a8/Cd6	2	BP
GO:0098727	GO:0098727	maintenance of cell number	1/168	169/23210	0.708349	0.783696	0.751826	Nodal	1	BP
GO:2001242	GO:2001242	regulation of intrinsic apoptotic signaling pathway	1/168	169/23210	0.708349	0.783696	0.751826	S100a8	1	BP
GO:0097237	GO:0097237	cellular response to toxic substance	1/168	170/23210	0.710475	0.785179	0.753249	Adh4	1	BP
GO:1904892	GO:1904892	regulation of receptor signaling pathway via STAT	1/168	170/23210	0.710475	0.785179	0.753249	Gfra2	1	BP
GO:0007612	GO:0007612	learning	1/168	171/23210	0.712586	0.787077	0.755069	Cacna1c	1	BP
GO:0006403	GO:0006403	RNA localization	1/168	172/23210	0.714682	0.788955	0.756871	Sarnp	1	BP
GO:0018205	GO:0018205	peptidyl-lysine modification	2/168	345/23210	0.715541	0.789468	0.757363	Nat8/Setd7	2	BP
GO:0031644	GO:0031644	regulation of nervous system process	1/168	173/23210	0.716763	0.790378	0.758236	Nlgn2	1	BP
GO:0030041	GO:0030041	actin filament polymerization	1/168	174/23210	0.718828	0.792218	0.760002	Tmod4	1	BP
GO:1990778	GO:1990778	protein localization to cell periphery	2/168	348/23210	0.720001	0.792728	0.760491	Fyb2/S100a10	2	BP
GO:0035107	GO:0035107	appendage morphogenesis	1/168	175/23210	0.720879	0.792728	0.760491	Cacna1c	1	BP
GO:0035108	GO:0035108	limb morphogenesis	1/168	175/23210	0.720879	0.792728	0.760491	Cacna1c	1	BP
GO:0060401	GO:0060401	cytosolic calcium ion transport	1/168	175/23210	0.720879	0.792728	0.760491	Adrb1	1	BP
GO:0002262	GO:0002262	myeloid cell homeostasis	1/168	176/23210	0.722914	0.79322	0.760963	Atpif1	1	BP
GO:0008064	GO:0008064	regulation of actin polymerization or depolymerization	1/168	176/23210	0.722914	0.79322	0.760963	Tmod4	1	BP
GO:0016202	GO:0016202	regulation of striated muscle tissue development	1/168	176/23210	0.722914	0.79322	0.760963	Adrb1	1	BP
GO:0035148	GO:0035148	tube formation	1/168	176/23210	0.722914	0.79322	0.760963	Nodal	1	BP
GO:0007219	GO:0007219	Notch signaling pathway	1/168	177/23210	0.724935	0.795	0.762671	Onecut1	1	BP
GO:0043524	GO:0043524	negative regulation of neuron apoptotic process	1/168	178/23210	0.726942	0.796324	0.76394	Mt1	1	BP
GO:0051588	GO:0051588	regulation of neurotransmitter transport	1/168	178/23210	0.726942	0.796324	0.76394	Baiap3	1	BP
GO:0033044	GO:0033044	regulation of chromosome organization	2/168	354/23210	0.728744	0.796324	0.76394	Prkcq/Setd7	2	BP
GO:0030832	GO:0030832	regulation of actin filament length	1/168	179/23210	0.728933	0.796324	0.76394	Tmod4	1	BP
GO:0140013	GO:0140013	meiotic nuclear division	1/168	179/23210	0.728933	0.796324	0.76394	Brdt	1	BP
GO:1901861	GO:1901861	regulation of muscle tissue development	1/168	179/23210	0.728933	0.796324	0.76394	Adrb1	1	BP
GO:1903034	GO:1903034	regulation of response to wounding	1/168	179/23210	0.728933	0.796324	0.76394	Prkcq	1	BP
GO:0044772	GO:0044772	mitotic cell cycle phase transition	2/168	355/23210	0.730178	0.797176	0.764758	Prkcq/Rad51b	2	BP
GO:0007416	GO:0007416	synapse assembly	1/168	180/23210	0.730911	0.797176	0.764758	Nlgn2	1	BP
GO:0048634	GO:0048634	regulation of muscle organ development	1/168	180/23210	0.730911	0.797176	0.764758	Adrb1	1	BP
GO:0031331	GO:0031331	positive regulation of cellular catabolic process	2/168	356/23210	0.731607	0.797499	0.765068	Atpif1/Gck	2	BP
GO:0006839	GO:0006839	mitochondrial transport	1/168	181/23210	0.732874	0.797574	0.76514	Atpif1	1	BP
GO:0015931	GO:0015931	nucleobase-containing compound transport	1/168	181/23210	0.732874	0.797574	0.76514	Sarnp	1	BP
GO:0050853	GO:0050853	B cell receptor signaling pathway	1/168	181/23210	0.732874	0.797574	0.76514	Ighv8-8	1	BP
GO:0016331	GO:0016331	morphogenesis of embryonic epithelium	1/168	182/23210	0.734822	0.797956	0.765506	Nodal	1	BP
GO:0035051	GO:0035051	cardiocyte differentiation	1/168	182/23210	0.734822	0.797956	0.765506	Adrb1	1	BP
GO:0120032	GO:0120032	regulation of plasma membrane bounded cell projection assembly	1/168	182/23210	0.734822	0.797956	0.765506	Prkcq	1	BP
GO:2001252	GO:2001252	positive regulation of chromosome organization	1/168	182/23210	0.734822	0.797956	0.765506	Prkcq	1	BP
GO:0042060	GO:0042060	wound healing	2/168	361/23210	0.738653	0.800836	0.768269	Adrb1/Prkcq	2	BP
GO:0048167	GO:0048167	regulation of synaptic plasticity	2/168	361/23210	0.738653	0.800836	0.768269	Adrb1/Syn1	2	BP
GO:0060491	GO:0060491	regulation of cell projection assembly	1/168	184/23210	0.738678	0.800836	0.768269	Prkcq	1	BP
GO:0051961	GO:0051961	negative regulation of nervous system development	2/168	362/23210	0.740043	0.801597	0.768999	Pitx3/Dio3	2	BP
GO:0010770	GO:0010770	positive regulation of cell morphogenesis involved in differentiation	1/168	185/23210	0.740584	0.801597	0.768999	S100a10	1	BP
GO:0045766	GO:0045766	positive regulation of angiogenesis	1/168	185/23210	0.740584	0.801597	0.768999	Nodal	1	BP
GO:0022408	GO:0022408	negative regulation of cell-cell adhesion	1/168	186/23210	0.742477	0.802261	0.769636	Ptpn22	1	BP
GO:1903305	GO:1903305	regulation of regulated secretory pathway	1/168	186/23210	0.742477	0.802261	0.769636	Baiap3	1	BP
GO:1905475	GO:1905475	regulation of protein localization to membrane	1/168	186/23210	0.742477	0.802261	0.769636	Nlgn2	1	BP
GO:0001101	GO:0001101	response to acid chemical	2/168	364/23210	0.742804	0.802261	0.769636	Ptk6/S100a10	2	BP
GO:0006473	GO:0006473	protein acetylation	1/168	187/23210	0.744356	0.803502	0.770827	Nat8	1	BP
GO:0046328	GO:0046328	regulation of JNK cascade	1/168	188/23210	0.746221	0.805081	0.772341	Ptpn22	1	BP
GO:0006911	GO:0006911	phagocytosis, engulfment	1/168	189/23210	0.748073	0.806401	0.773608	Ighv8-8	1	BP
GO:1901214	GO:1901214	regulation of neuron death	2/168	368/23210	0.748253	0.806401	0.773608	Mt1/Pitx3	2	BP
GO:0044706	GO:0044706	multi-multicellular organism process	1/168	190/23210	0.749912	0.807753	0.774905	Nodal	1	BP
GO:0032102	GO:0032102	negative regulation of response to external stimulus	2/168	373/23210	0.754925	0.81262	0.779573	Susd4/Irak3	2	BP
GO:0044270	GO:0044270	cellular nitrogen compound catabolic process	2/168	374/23210	0.756241	0.81262	0.779573	Acmsd/Dctpp1	2	BP
GO:0000209	GO:0000209	protein polyubiquitination	1/168	194/23210	0.757133	0.81262	0.779573	Ptpn22	1	BP
GO:0099173	GO:0099173	postsynapse organization	1/168	194/23210	0.757133	0.81262	0.779573	Nlgn2	1	BP
GO:0006887	GO:0006887	exocytosis	2/168	375/23210	0.757551	0.81262	0.779573	Cacna1c/Baiap3	2	BP
GO:0006631	GO:0006631	fatty acid metabolic process	2/168	376/23210	0.758855	0.81262	0.779573	Acnat2/Elovl3	2	BP
GO:0034329	GO:0034329	cell junction assembly	2/168	376/23210	0.758855	0.81262	0.779573	S100a10/Nlgn2	2	BP
GO:0002706	GO:0002706	regulation of lymphocyte mediated immunity	1/168	195/23210	0.758906	0.81262	0.779573	Susd4	1	BP
GO:0003205	GO:0003205	cardiac chamber development	1/168	195/23210	0.758906	0.81262	0.779573	Tnnc1	1	BP
GO:0030307	GO:0030307	positive regulation of cell growth	1/168	195/23210	0.758906	0.81262	0.779573	Adrb1	1	BP
GO:0050731	GO:0050731	positive regulation of peptidyl-tyrosine phosphorylation	1/168	195/23210	0.758906	0.81262	0.779573	Bank1	1	BP
GO:0006486	GO:0006486	protein glycosylation	1/168	196/23210	0.760666	0.813632	0.780544	Dpy19l3	1	BP
GO:0043413	GO:0043413	macromolecule glycosylation	1/168	196/23210	0.760666	0.813632	0.780544	Dpy19l3	1	BP
GO:1902275	GO:1902275	regulation of chromatin organization	1/168	197/23210	0.762413	0.814967	0.781825	Setd7	1	BP
GO:0034248	GO:0034248	regulation of cellular amide metabolic process	2/168	379/23210	0.76273	0.814967	0.781825	Sarnp/Bank1	2	BP
GO:0046700	GO:0046700	heterocycle catabolic process	2/168	380/23210	0.76401	0.815172	0.782022	Acmsd/Dctpp1	2	BP
GO:0099024	GO:0099024	plasma membrane invagination	1/168	198/23210	0.764148	0.815172	0.782022	Ighv8-8	1	BP
GO:1903046	GO:1903046	meiotic cell cycle process	1/168	198/23210	0.764148	0.815172	0.782022	Brdt	1	BP
GO:0031396	GO:0031396	regulation of protein ubiquitination	1/168	199/23210	0.765869	0.816137	0.782948	Ptpn22	1	BP
GO:0044242	GO:0044242	cellular lipid catabolic process	1/168	199/23210	0.765869	0.816137	0.782948	Apoc3	1	BP
GO:0008154	GO:0008154	actin polymerization or depolymerization	1/168	201/23210	0.769276	0.818457	0.785173	Tmod4	1	BP
GO:0048736	GO:0048736	appendage development	1/168	201/23210	0.769276	0.818457	0.785173	Cacna1c	1	BP
GO:0060173	GO:0060173	limb development	1/168	201/23210	0.769276	0.818457	0.785173	Cacna1c	1	BP
GO:0007254	GO:0007254	JNK cascade	1/168	202/23210	0.77096	0.819812	0.786474	Ptpn22	1	BP
GO:1904018	GO:1904018	positive regulation of vasculature development	1/168	204/23210	0.774293	0.822918	0.789453	Nodal	1	BP
GO:0010324	GO:0010324	membrane invagination	1/168	205/23210	0.775941	0.823793	0.790292	Ighv8-8	1	BP
GO:0051099	GO:0051099	positive regulation of binding	1/168	205/23210	0.775941	0.823793	0.790292	S100a10	1	BP
GO:0016197	GO:0016197	endosomal transport	1/168	206/23210	0.777577	0.824653	0.791118	Baiap3	1	BP
GO:0051054	GO:0051054	positive regulation of DNA metabolic process	1/168	206/23210	0.777577	0.824653	0.791118	Prkcq	1	BP
GO:0006732	GO:0006732	coenzyme metabolic process	1/168	207/23210	0.779202	0.825937	0.79235	Acnat2	1	BP
GO:0044770	GO:0044770	cell cycle phase transition	2/168	393/23210	0.780115	0.826331	0.792727	Prkcq/Rad51b	2	BP
GO:1903050	GO:1903050	regulation of proteolysis involved in cellular protein catabolic process	1/168	208/23210	0.780814	0.826331	0.792727	Atpif1	1	BP
GO:1903708	GO:1903708	positive regulation of hemopoiesis	1/168	208/23210	0.780814	0.826331	0.792727	Ocstamp	1	BP
GO:0019722	GO:0019722	calcium-mediated signaling	1/168	209/23210	0.782415	0.826369	0.792763	Itgal	1	BP
GO:2000027	GO:2000027	regulation of animal organ morphogenesis	1/168	209/23210	0.782415	0.826369	0.792763	Dio3	1	BP
GO:0030098	GO:0030098	lymphocyte differentiation	2/168	395/23210	0.782505	0.826369	0.792763	Onecut1/Ptpn22	2	BP
GO:0042692	GO:0042692	muscle cell differentiation	2/168	395/23210	0.782505	0.826369	0.792763	Adrb1/Tmod4	2	BP
GO:0045732	GO:0045732	positive regulation of protein catabolic process	1/168	210/23210	0.784005	0.827077	0.793443	Atpif1	1	BP
GO:0070085	GO:0070085	glycosylation	1/168	210/23210	0.784005	0.827077	0.793443	Dpy19l3	1	BP
GO:0006814	GO:0006814	sodium ion transport	1/168	211/23210	0.785582	0.827867	0.794201	Atp4a	1	BP
GO:0048839	GO:0048839	inner ear development	1/168	211/23210	0.785582	0.827867	0.794201	Mycl	1	BP
GO:0060249	GO:0060249	anatomical structure homeostasis	2/168	398/23210	0.786049	0.827922	0.794254	Tff3/Prkcq	2	BP
GO:0009913	GO:0009913	epidermal cell differentiation	1/168	213/23210	0.788703	0.829842	0.796096	Mycl	1	BP
GO:0050920	GO:0050920	regulation of chemotaxis	1/168	213/23210	0.788703	0.829842	0.796096	Pla2g7	1	BP
GO:0032271	GO:0032271	regulation of protein polymerization	1/168	215/23210	0.791779	0.831764	0.797939	Tmod4	1	BP
GO:0050871	GO:0050871	positive regulation of B cell activation	1/168	215/23210	0.791779	0.831764	0.797939	Ighv8-8	1	BP
GO:0071824	GO:0071824	protein-DNA complex subunit organization	1/168	215/23210	0.791779	0.831764	0.797939	Brdt	1	BP
GO:0002573	GO:0002573	myeloid leukocyte differentiation	1/168	216/23210	0.793301	0.832924	0.799052	Ocstamp	1	BP
GO:0007286	GO:0007286	spermatid development	1/168	218/23210	0.79631	0.83484	0.80089	Xlr4a	1	BP
GO:0030258	GO:0030258	lipid modification	1/168	218/23210	0.79631	0.83484	0.80089	Pla2g7	1	BP
GO:1903706	GO:1903706	regulation of hemopoiesis	2/168	407/23210	0.79638	0.83484	0.80089	Ocstamp/Csf3r	2	BP
GO:0030324	GO:0030324	lung development	1/168	219/23210	0.797798	0.835888	0.801896	Nodal	1	BP
GO:0043406	GO:0043406	positive regulation of MAP kinase activity	1/168	220/23210	0.799276	0.836997	0.80296	Pik3r5	1	BP
GO:0031334	GO:0031334	positive regulation of protein-containing complex assembly	1/168	221/23210	0.800743	0.838094	0.804012	Jchain	1	BP
GO:0030323	GO:0030323	respiratory tube development	1/168	222/23210	0.802199	0.839178	0.805052	Nodal	1	BP
GO:0043254	GO:0043254	regulation of protein-containing complex assembly	2/168	414/23210	0.804109	0.840736	0.806546	Jchain/Tmod4	2	BP
GO:0021953	GO:0021953	central nervous system neuron differentiation	1/168	225/23210	0.806504	0.842799	0.808525	D16Ertd472e	1	BP
GO:0048515	GO:0048515	spermatid differentiation	1/168	227/23210	0.809322	0.84486	0.810503	Xlr4a	1	BP
GO:0051607	GO:0051607	defense response to virus	1/168	227/23210	0.809322	0.84486	0.810503	Ptpn22	1	BP
GO:0007517	GO:0007517	muscle organ development	2/168	424/23210	0.814701	0.848842	0.814323	Tnnc1/Adrb1	2	BP
GO:0009896	GO:0009896	positive regulation of catabolic process	2/168	424/23210	0.814701	0.848842	0.814323	Atpif1/Gck	2	BP
GO:0009952	GO:0009952	anterior/posterior pattern specification	1/168	231/23210	0.814837	0.848842	0.814323	Nodal	1	BP
GO:0043543	GO:0043543	protein acylation	1/168	231/23210	0.814837	0.848842	0.814323	Nat8	1	BP
GO:0032872	GO:0032872	regulation of stress-activated MAPK cascade	1/168	232/23210	0.816191	0.849809	0.81525	Ptpn22	1	BP
GO:0016570	GO:0016570	histone modification	2/168	427/23210	0.817778	0.851017	0.81641	Ntmt1/Setd7	2	BP
GO:0070302	GO:0070302	regulation of stress-activated protein kinase signaling cascade	1/168	234/23210	0.818869	0.851709	0.817073	Ptpn22	1	BP
GO:0001894	GO:0001894	tissue homeostasis	1/168	238/23210	0.824109	0.856267	0.821446	Tff3	1	BP
GO:0006470	GO:0006470	protein dephosphorylation	1/168	238/23210	0.824109	0.856267	0.821446	Ptpn22	1	BP
GO:1903362	GO:1903362	regulation of cellular protein catabolic process	1/168	239/23210	0.825395	0.857158	0.822301	Atpif1	1	BP
GO:0045860	GO:0045860	positive regulation of protein kinase activity	2/168	438/23210	0.828675	0.859766	0.824803	Mmd2/Pik3r5	2	BP
GO:0006260	GO:0006260	DNA replication	1/168	242/23210	0.829199	0.859766	0.824803	Mcm10	1	BP
GO:0043583	GO:0043583	ear development	1/168	242/23210	0.829199	0.859766	0.824803	Mycl	1	BP
GO:0017157	GO:0017157	regulation of exocytosis	1/168	244/23210	0.831688	0.861453	0.826421	Baiap3	1	BP
GO:1901215	GO:1901215	negative regulation of neuron death	1/168	244/23210	0.831688	0.861453	0.826421	Mt1	1	BP
GO:0060291	GO:0060291	long-term synaptic potentiation	1/168	245/23210	0.832919	0.862281	0.827215	Adrb1	1	BP
GO:0016569	GO:0016569	covalent chromatin modification	2/168	444/23210	0.83437	0.863335	0.828226	Ntmt1/Setd7	2	BP
GO:0002064	GO:0002064	epithelial cell development	1/168	247/23210	0.835355	0.86346	0.828346	Onecut1	1	BP
GO:0021537	GO:0021537	telencephalon development	1/168	247/23210	0.835355	0.86346	0.828346	Hsd3b5	1	BP
GO:0031503	GO:0031503	protein-containing complex localization	1/168	249/23210	0.837755	0.865045	0.829867	Sarnp	1	BP
GO:0090068	GO:0090068	positive regulation of cell cycle process	1/168	249/23210	0.837755	0.865045	0.829867	Rad51b	1	BP
GO:0014706	GO:0014706	striated muscle tissue development	2/168	449/23210	0.838985	0.865867	0.830656	Tnnc1/Adrb1	2	BP
GO:0060541	GO:0060541	respiratory system development	1/168	251/23210	0.840121	0.866592	0.831351	Nodal	1	BP
GO:0050808	GO:0050808	synapse organization	2/168	451/23210	0.840799	0.866843	0.831592	Nlgn2/Syn1	2	BP
GO:0002703	GO:0002703	regulation of leukocyte mediated immunity	1/168	253/23210	0.842452	0.8681	0.832797	Susd4	1	BP
GO:0048285	GO:0048285	organelle fission	2/168	455/23210	0.844371	0.869628	0.834263	Brdt/Gimap3	2	BP
GO:0051403	GO:0051403	stress-activated MAPK cascade	1/168	257/23210	0.847014	0.8719	0.836444	Ptpn22	1	BP
GO:0006605	GO:0006605	protein targeting	1/168	259/23210	0.849245	0.873747	0.838215	Atpif1	1	BP
GO:0045665	GO:0045665	negative regulation of neuron differentiation	1/168	260/23210	0.850349	0.873982	0.83844	Dio3	1	BP
GO:0048588	GO:0048588	developmental cell growth	1/168	260/23210	0.850349	0.873982	0.83844	Adrb1	1	BP
GO:0002699	GO:0002699	positive regulation of immune effector process	1/168	261/23210	0.851444	0.874658	0.839088	Ptpn22	1	BP
GO:0006281	GO:0006281	DNA repair	2/168	464/23210	0.852145	0.874875	0.839297	Dntt/Rad51b	2	BP
GO:0048705	GO:0048705	skeletal system morphogenesis	1/168	262/23210	0.852532	0.874875	0.839297	Nodal	1	BP
GO:0050807	GO:0050807	regulation of synapse organization	1/168	266/23210	0.856803	0.878806	0.843069	Nlgn2	1	BP
GO:0060537	GO:0060537	muscle tissue development	2/168	472/23210	0.858758	0.879594	0.843824	Tnnc1/Adrb1	2	BP
GO:0030336	GO:0030336	negative regulation of cell migration	1/168	268/23210	0.858893	0.879594	0.843824	Nodal	1	BP
GO:0034599	GO:0034599	cellular response to oxidative stress	1/168	268/23210	0.858893	0.879594	0.843824	Diablo	1	BP
GO:0030217	GO:0030217	T cell differentiation	1/168	269/23210	0.859926	0.880201	0.844407	Ptpn22	1	BP
GO:0033674	GO:0033674	positive regulation of kinase activity	2/168	476/23210	0.861963	0.881834	0.845973	Mmd2/Pik3r5	2	BP
GO:0060485	GO:0060485	mesenchyme development	1/168	273/23210	0.863985	0.88345	0.847523	Nodal	1	BP
GO:0051258	GO:0051258	protein polymerization	1/168	274/23210	0.864981	0.884016	0.848066	Tmod4	1	BP
GO:0050803	GO:0050803	regulation of synapse structure or activity	1/168	276/23210	0.866952	0.885577	0.849563	Nlgn2	1	BP
GO:0009101	GO:0009101	glycoprotein biosynthetic process	1/168	278/23210	0.868894	0.887107	0.851031	Dpy19l3	1	BP
GO:0071902	GO:0071902	positive regulation of protein serine/threonine kinase activity	1/168	279/23210	0.869854	0.887634	0.851537	Pik3r5	1	BP
GO:0006310	GO:0006310	DNA recombination	1/168	280/23210	0.870808	0.888153	0.852035	Rad51b	1	BP
GO:2000146	GO:2000146	negative regulation of cell motility	1/168	281/23210	0.871754	0.888664	0.852526	Nodal	1	BP
GO:0007346	GO:0007346	regulation of mitotic cell cycle	2/168	493/23210	0.874858	0.890919	0.854688	Prkcq/Rad51b	2	BP
GO:0048568	GO:0048568	embryonic organ development	2/168	493/23210	0.874858	0.890919	0.854688	Nodal/Nsdhl	2	BP
GO:0009611	GO:0009611	response to wounding	2/168	496/23210	0.877016	0.892661	0.85636	Adrb1/Prkcq	2	BP
GO:0051640	GO:0051640	organelle localization	2/168	497/23210	0.877727	0.89293	0.856618	Nlgn2/Syn1	2	BP
GO:0072593	GO:0072593	reactive oxygen species metabolic process	1/168	288/23210	0.87819	0.892946	0.856633	Atpif1	1	BP
GO:0031098	GO:0031098	stress-activated protein kinase signaling cascade	1/168	290/23210	0.879969	0.894299	0.857931	Ptpn22	1	BP
GO:1902105	GO:1902105	regulation of leukocyte differentiation	1/168	294/23210	0.88345	0.89738	0.860887	Ocstamp	1	BP
GO:0060271	GO:0060271	cilium assembly	1/168	299/23210	0.88766	0.901198	0.86455	Onecut1	1	BP
GO:0045765	GO:0045765	regulation of angiogenesis	1/168	307/23210	0.894085	0.90726	0.870365	Nodal	1	BP
GO:0007059	GO:0007059	chromosome segregation	1/168	315/23210	0.900144	0.912297	0.875197	Ntmt1	1	BP
GO:0048872	GO:0048872	homeostasis of number of cells	1/168	315/23210	0.900144	0.912297	0.875197	Atpif1	1	BP
GO:0040013	GO:0040013	negative regulation of locomotion	1/168	316/23210	0.900876	0.912297	0.875197	Nodal	1	BP
GO:0051271	GO:0051271	negative regulation of cellular component movement	1/168	316/23210	0.900876	0.912297	0.875197	Nodal	1	BP
GO:0021700	GO:0021700	developmental maturation	1/168	317/23210	0.901604	0.912571	0.87546	Baiap3	1	BP
GO:0048562	GO:0048562	embryonic organ morphogenesis	1/168	318/23210	0.902326	0.912839	0.875717	Nodal	1	BP
GO:0062197	GO:0062197	cellular response to chemical stress	1/168	322/23210	0.905162	0.915245	0.878025	Diablo	1	BP
GO:0044782	GO:0044782	cilium organization	1/168	327/23210	0.908592	0.918248	0.880906	Onecut1	1	BP
GO:0034655	GO:0034655	nucleobase-containing compound catabolic process	1/168	336/23210	0.914458	0.923709	0.886146	Dctpp1	1	BP
GO:0009100	GO:0009100	glycoprotein metabolic process	1/168	338/23210	0.91571	0.924506	0.88691	Dpy19l3	1	BP
GO:0019221	GO:0019221	cytokine-mediated signaling pathway	1/168	341/23210	0.917554	0.925432	0.887798	Irak3	1	BP
GO:1901342	GO:1901342	regulation of vasculature development	1/168	341/23210	0.917554	0.925432	0.887798	Nodal	1	BP
GO:0010769	GO:0010769	regulation of cell morphogenesis involved in differentiation	1/168	343/23210	0.918761	0.926182	0.888517	S100a10	1	BP
GO:0001655	GO:0001655	urogenital system development	1/168	346/23210	0.920539	0.927505	0.889787	Cyp7b1	1	BP
GO:0045787	GO:0045787	positive regulation of cell cycle	1/168	349/23210	0.922277	0.928789	0.891018	Rad51b	1	BP
GO:0008380	GO:0008380	RNA splicing	1/168	364/23210	0.93042	0.936517	0.898432	Brdt	1	BP
GO:0016311	GO:0016311	dephosphorylation	1/168	366/23210	0.93144	0.936599	0.898511	Ptpn22	1	BP
GO:0051052	GO:0051052	regulation of DNA metabolic process	1/168	366/23210	0.93144	0.936599	0.898511	Prkcq	1	BP
GO:0003002	GO:0003002	regionalization	1/168	373/23210	0.934893	0.939598	0.901388	Nodal	1	BP
GO:0060562	GO:0060562	epithelial tube morphogenesis	1/168	380/23210	0.938173	0.94242	0.904095	Nodal	1	BP
GO:0010256	GO:0010256	endomembrane system organization	1/168	390/23210	0.942576	0.946367	0.907882	Baiap3	1	BP
GO:0032535	GO:0032535	regulation of cellular component size	1/168	397/23210	0.945471	0.948797	0.910213	Tmod4	1	BP
GO:0006979	GO:0006979	response to oxidative stress	1/168	400/23210	0.946667	0.949437	0.910827	Diablo	1	BP
GO:0010639	GO:0010639	negative regulation of organelle organization	1/168	401/23210	0.947059	0.949437	0.910827	Tmod4	1	BP
GO:0051098	GO:0051098	regulation of binding	1/168	403/23210	0.947836	0.949739	0.911116	S100a10	1	BP
GO:0001667	GO:0001667	ameboidal-type cell migration	1/168	407/23210	0.949357	0.950682	0.912021	Nodal	1	BP
GO:0000280	GO:0000280	nuclear division	1/168	408/23210	0.94973	0.950682	0.912021	Brdt	1	BP
GO:0001558	GO:0001558	regulation of cell growth	1/168	431/23210	0.957596	0.958076	0.919114	Adrb1	1	BP
GO:0006397	GO:0006397	mRNA processing	1/168	448/23210	0.962612	0.962612	0.923466	Brdt	1	BP

## Sheet: MF
	ID	Description	GeneRatio	BgRatio	pvalue	p.adjust	qvalue	geneID	Count	category
GO:0016830	GO:0016830	carbon-carbon lyase activity	4/161	50/22707	0.000434951	0.0689747	0.0653224	Acmsd/Aldoc/Urad/Csad	4	MF
GO:0004497	GO:0004497	monooxygenase activity	6/161	143/22707	0.000555684	0.0689747	0.0653224	Cyp3a16/Cyp51/Cyp7b1/Cyp8b1/Msmo1/Sqle	6	MF
GO:0016705	GO:0016705	oxidoreductase activity, acting on paired donors, with incorporation or reduction of molecular oxygen	7/161	203/22707	0.000628949	0.0689747	0.0653224	9130409I23Rik/Cyp3a16/Cyp51/Cyp7b1/Cyp8b1/Msmo1/Sqle	7	MF
GO:0016831	GO:0016831	carboxy-lyase activity	3/161	33/22707	0.00163279	0.124889	0.118276	Acmsd/Urad/Csad	3	MF
GO:0003854	GO:0003854	3-beta-hydroxy-delta5-steroid dehydrogenase activity	2/161	10/22707	0.00216586	0.124889	0.118276	Hsd3b5/Nsdhl	2	MF
GO:0033764	GO:0033764	steroid dehydrogenase activity, acting on the CH-OH group of donors, NAD or NADP as acceptor	3/161	37/22707	0.00227761	0.124889	0.118276	Hsd3b5/Nsdhl/Rdh16f2	3	MF
GO:0016616	GO:0016616	oxidoreductase activity, acting on the CH-OH group of donors, NAD or NADP as acceptor	5/161	140/22707	0.00325679	0.126998	0.120273	Adh4/Hsd3b5/Nsdhl/Rdh16f2/Phgdh	5	MF
GO:0005044	GO:0005044	scavenger receptor activity	3/161	45/22707	0.00399099	0.126998	0.120273	Scara5/Cd6/Dmbt1	3	MF
GO:0016229	GO:0016229	steroid dehydrogenase activity	3/161	45/22707	0.00399099	0.126998	0.120273	Hsd3b5/Nsdhl/Rdh16f2	3	MF
GO:0016709	GO:0016709	oxidoreductase activity, acting on paired donors, with incorporation or reduction of molecular oxygen, NAD(P)H as one donor, and incorporation of one atom of oxygen	3/161	45/22707	0.00399099	0.126998	0.120273	Cyp51/Msmo1/Sqle	3	MF
GO:0016614	GO:0016614	oxidoreductase activity, acting on CH-OH group of donors	5/161	149/22707	0.00424614	0.126998	0.120273	Adh4/Hsd3b5/Nsdhl/Rdh16f2/Phgdh	5	MF
GO:0016863	GO:0016863	intramolecular oxidoreductase activity, transposing C=C bonds	2/161	16/22707	0.00561666	0.15399	0.145836	Dct/Idi1	2	MF
GO:0005506	GO:0005506	iron ion binding	5/161	166/22707	0.00667084	0.168823	0.159884	Cyp3a16/Cyp51/Cyp7b1/Cyp8b1/Msmo1	5	MF
GO:0004030	GO:0004030	aldehyde dehydrogenase [NAD(P)+] activity	2/161	19/22707	0.00789309	0.185488	0.175666	Adh4/Aldh1b1	2	MF
GO:0016829	GO:0016829	lyase activity	5/161	184/22707	0.0101521	0.22267	0.21088	Acmsd/Aldoc/Car1/Urad/Csad	5	MF
GO:0000287	GO:0000287	magnesium ion binding	5/161	194/22707	0.0125445	0.257946	0.244287	Atp4a/Dctpp1/Idi1/Gck/Irak3	5	MF
GO:0008236	GO:0008236	serine-type peptidase activity	5/161	204/22707	0.015293	0.264179	0.25019	Gzmm/Cela2a/Ctrl/Gzmb/Klk1	5	MF
GO:0016825	GO:0016825	hydrolase activity, acting on acid phosphorus-nitrogen bonds	5/161	209/22707	0.0168073	0.264179	0.25019	Gzmm/Cela2a/Ctrl/Gzmb/Klk1	5	MF
GO:0017171	GO:0017171	serine hydrolase activity	5/161	209/22707	0.0168073	0.264179	0.25019	Gzmm/Cela2a/Ctrl/Gzmb/Klk1	5	MF
GO:0008395	GO:0008395	steroid hydroxylase activity	3/161	76/22707	0.0168625	0.264179	0.25019	Cyp3a16/Cyp7b1/Cyp8b1	3	MF
GO:0038024	GO:0038024	cargo receptor activity	3/161	76/22707	0.0168625	0.264179	0.25019	Scara5/Cd6/Dmbt1	3	MF
GO:0004857	GO:0004857	enzyme inhibitor activity	7/161	384/22707	0.0199532	0.298391	0.282591	Apoc3/Atpif1/Itih5/Ppp1r14a/Serpina12/Serpina1e/Wfdc21	7	MF
GO:0020037	GO:0020037	heme binding	4/161	157/22707	0.0257312	0.368068	0.348578	Cyp3a16/Cyp51/Cyp7b1/Cyp8b1	4	MF
GO:0046906	GO:0046906	tetrapyrrole binding	4/161	166/22707	0.0307098	0.406294	0.38478	Cyp3a16/Cyp51/Cyp7b1/Cyp8b1	4	MF
GO:0032451	GO:0032451	demethylase activity	2/161	41/22707	0.0342017	0.406294	0.38478	Cyp3a16/Cyp51	2	MF
GO:0004175	GO:0004175	endopeptidase activity	7/161	443/22707	0.0389334	0.406294	0.38478	Capn8/Gzmm/Adam11/Cela2a/Ctse/Gzmb/Klk1	7	MF
GO:0004252	GO:0004252	serine-type endopeptidase activity	4/161	182/22707	0.0408735	0.406294	0.38478	Gzmm/Cela2a/Gzmb/Klk1	4	MF
GO:0016746	GO:0016746	transferase activity, transferring acyl groups	5/161	267/22707	0.041923	0.406294	0.38478	Acnat2/Alas1/Elovl3/Nat8/Nat8f5	5	MF
GO:0099528	GO:0099528	G protein-coupled neurotransmitter receptor activity	2/161	46/22707	0.0421938	0.406294	0.38478	Chrm3/Adrb1	2	MF
GO:0016860	GO:0016860	intramolecular oxidoreductase activity	2/161	47/22707	0.0438685	0.406294	0.38478	Dct/Idi1	2	MF
GO:0003697	GO:0003697	single-stranded DNA binding	3/161	111/22707	0.0445475	0.406294	0.38478	Mcm10/Jchain/Rad51b	3	MF
GO:0016620	GO:0016620	oxidoreductase activity, acting on the aldehyde or oxo group of donors, NAD or NADP as acceptor	2/161	48/22707	0.0455675	0.406294	0.38478	Adh4/Aldh1b1	2	MF
GO:0016410	GO:0016410	N-acyltransferase activity	3/161	114/22707	0.0475684	0.406294	0.38478	Alas1/Nat8/Nat8f5	3	MF
GO:0030170	GO:0030170	pyridoxal phosphate binding	2/161	51/22707	0.0508069	0.406294	0.38478	Alas1/Csad	2	MF
GO:0004867	GO:0004867	serine-type endopeptidase inhibitor activity	3/161	118/22707	0.0517489	0.406294	0.38478	Itih5/Serpina12/Serpina1e	3	MF
GO:0070279	GO:0070279	vitamin B6 binding	2/161	52/22707	0.0525994	0.406294	0.38478	Alas1/Csad	2	MF
GO:0005160	GO:0005160	transforming growth factor beta receptor binding	2/161	53/22707	0.0544142	0.406294	0.38478	Nodal/Inhbb	2	MF
GO:0050662	GO:0050662	coenzyme binding	5/161	288/22707	0.0546967	0.406294	0.38478	Adh4/Alas1/Sqle/Csad/Phgdh	5	MF
GO:0042054	GO:0042054	histone methyltransferase activity	2/161	56/22707	0.0599884	0.406294	0.38478	Ntmt1/Setd7	2	MF
GO:0005088	GO:0005088	Ras guanyl-nucleotide exchange factor activity	3/161	127/22707	0.0617791	0.406294	0.38478	Tiam2/Adrb1/Fgd3	3	MF
GO:0016903	GO:0016903	oxidoreductase activity, acting on the aldehyde or oxo group of donors	2/161	58/22707	0.0638089	0.406294	0.38478	Adh4/Aldh1b1	2	MF
GO:0030414	GO:0030414	peptidase inhibitor activity	4/161	212/22707	0.0644822	0.406294	0.38478	Itih5/Serpina12/Serpina1e/Wfdc21	4	MF
GO:0019842	GO:0019842	vitamin binding	3/161	132/22707	0.0677136	0.406294	0.38478	Adh4/Alas1/Csad	3	MF
GO:0008331	GO:0008331	high voltage-gated calcium channel activity	1/161	10/22707	0.0686964	0.406294	0.38478	Cacna1c	1	MF
GO:0047429	GO:0047429	nucleoside-triphosphate diphosphatase activity	1/161	10/22707	0.0686964	0.406294	0.38478	Dctpp1	1	MF
GO:0050542	GO:0050542	icosanoid binding	1/161	10/22707	0.0686964	0.406294	0.38478	S100a8	1	MF
GO:0050543	GO:0050543	icosatetraenoic acid binding	1/161	10/22707	0.0686964	0.406294	0.38478	S100a8	1	MF
GO:0051287	GO:0051287	NAD binding	2/161	62/22707	0.0716867	0.406294	0.38478	Adh4/Phgdh	2	MF
GO:0004312	GO:0004312	fatty acid synthase activity	1/161	11/22707	0.0753026	0.406294	0.38478	Elovl3	1	MF
GO:0004865	GO:0004865	protein serine/threonine phosphatase inhibitor activity	1/161	11/22707	0.0753026	0.406294	0.38478	Ppp1r14a	1	MF
GO:0005391	GO:0005391	sodium:potassium-exchanging ATPase activity	1/161	11/22707	0.0753026	0.406294	0.38478	Atp4a	1	MF
GO:0008554	GO:0008554	sodium transmembrane transporter activity, phosphorylative mechanism	1/161	11/22707	0.0753026	0.406294	0.38478	Atp4a	1	MF
GO:0008556	GO:0008556	potassium transmembrane transporter activity, phosphorylative mechanism	1/161	11/22707	0.0753026	0.406294	0.38478	Atp4a	1	MF
GO:0019103	GO:0019103	pyrimidine nucleotide binding	1/161	11/22707	0.0753026	0.406294	0.38478	Dctpp1	1	MF
GO:0055102	GO:0055102	lipase inhibitor activity	1/161	11/22707	0.0753026	0.406294	0.38478	Apoc3	1	MF
GO:0005536	GO:0005536	glucose binding	1/161	12/22707	0.0818621	0.406294	0.38478	Gck	1	MF
GO:0031994	GO:0031994	insulin-like growth factor I binding	1/161	12/22707	0.0818621	0.406294	0.38478	Igfbp1	1	MF
GO:0045028	GO:0045028	G protein-coupled purinergic nucleotide receptor activity	1/161	12/22707	0.0818621	0.406294	0.38478	P2ry13	1	MF
GO:0047023	GO:0047023	androsterone dehydrogenase activity	1/161	12/22707	0.0818621	0.406294	0.38478	Rdh16f2	1	MF
GO:0048185	GO:0048185	activin binding	1/161	12/22707	0.0818621	0.406294	0.38478	Fst	1	MF
GO:0101020	GO:0101020	estrogen 16-alpha-hydroxylase activity	1/161	12/22707	0.0818621	0.406294	0.38478	Cyp3a16	1	MF
GO:0016747	GO:0016747	transferase activity, transferring acyl groups other than amino-acyl groups	4/161	233/22707	0.084451	0.406294	0.38478	Alas1/Elovl3/Nat8/Nat8f5	4	MF
GO:0005089	GO:0005089	Rho guanyl-nucleotide exchange factor activity	2/161	70/22707	0.0883077	0.406294	0.38478	Tiam2/Fgd3	2	MF
GO:0005523	GO:0005523	tropomyosin binding	1/161	13/22707	0.0883755	0.406294	0.38478	Tmod4	1	MF
GO:0008401	GO:0008401	retinoic acid 4-hydroxylase activity	1/161	13/22707	0.0883755	0.406294	0.38478	Cyp3a16	1	MF
GO:0016832	GO:0016832	aldehyde-lyase activity	1/161	13/22707	0.0883755	0.406294	0.38478	Aldoc	1	MF
GO:0019841	GO:0019841	retinol binding	1/161	13/22707	0.0883755	0.406294	0.38478	Adh4	1	MF
GO:0036312	GO:0036312	phosphatidylinositol 3-kinase regulatory subunit binding	1/161	13/22707	0.0883755	0.406294	0.38478	Fam83a	1	MF
GO:0048306	GO:0048306	calcium-dependent protein binding	2/161	71/22707	0.0904596	0.406294	0.38478	Tnnc1/Syn1	2	MF
GO:0008227	GO:0008227	G protein-coupled amine receptor activity	2/161	73/22707	0.0948095	0.406294	0.38478	Chrm3/Adrb1	2	MF
GO:0035325	GO:0035325	Toll-like receptor binding	1/161	14/22707	0.0948429	0.406294	0.38478	S100a8	1	MF
GO:0042043	GO:0042043	neurexin family protein binding	1/161	14/22707	0.0948429	0.406294	0.38478	Nlgn2	1	MF
GO:0046935	GO:0046935	1-phosphatidylinositol-3-kinase regulator activity	1/161	14/22707	0.0948429	0.406294	0.38478	Pik3r5	1	MF
GO:0016853	GO:0016853	isomerase activity	3/161	153/22707	0.0952756	0.406294	0.38478	Dct/Fkbp11/Idi1	3	MF
GO:0061134	GO:0061134	peptidase regulator activity	4/161	244/22707	0.0959852	0.406294	0.38478	Itih5/Serpina12/Serpina1e/Wfdc21	4	MF
GO:0098960	GO:0098960	postsynaptic neurotransmitter receptor activity	2/161	75/22707	0.0992185	0.406294	0.38478	Chrm3/Adrb1	2	MF
GO:0052689	GO:0052689	carboxylic ester hydrolase activity	3/161	156/22707	0.0995382	0.406294	0.38478	Car1/Pla2g7/Pnliprp1	3	MF
GO:0004089	GO:0004089	carbonate dehydratase activity	1/161	15/22707	0.101265	0.406294	0.38478	Car1	1	MF
GO:0004198	GO:0004198	calcium-dependent cysteine-type endopeptidase activity	1/161	15/22707	0.101265	0.406294	0.38478	Capn8	1	MF
GO:0004697	GO:0004697	protein kinase C activity	1/161	15/22707	0.101265	0.406294	0.38478	Prkcq	1	MF
GO:0016918	GO:0016918	retinal binding	1/161	15/22707	0.101265	0.406294	0.38478	Adh4	1	MF
GO:0042834	GO:0042834	peptidoglycan binding	1/161	15/22707	0.101265	0.406294	0.38478	Jchain	1	MF
GO:0000400	GO:0000400	four-way junction DNA binding	1/161	16/22707	0.107641	0.407057	0.385503	Rad51b	1	MF
GO:0015095	GO:0015095	magnesium ion transmembrane transporter activity	1/161	16/22707	0.107641	0.407057	0.385503	Cnnm4	1	MF
GO:0035240	GO:0035240	dopamine binding	1/161	16/22707	0.107641	0.407057	0.385503	Adrb1	1	MF
GO:0042166	GO:0042166	acetylcholine binding	1/161	16/22707	0.107641	0.407057	0.385503	Chrm3	1	MF
GO:0048019	GO:0048019	receptor antagonist activity	1/161	16/22707	0.107641	0.407057	0.385503	Fst	1	MF
GO:0004029	GO:0004029	aldehyde dehydrogenase (NAD+) activity	1/161	17/22707	0.113973	0.407577	0.385995	Aldh1b1	1	MF
GO:0005186	GO:0005186	pheromone activity	1/161	17/22707	0.113973	0.407577	0.385995	Mup1	1	MF
GO:0015347	GO:0015347	sodium-independent organic anion transmembrane transporter activity	1/161	17/22707	0.113973	0.407577	0.385995	Slco1a1	1	MF
GO:0070577	GO:0070577	lysine-acetylated histone binding	1/161	17/22707	0.113973	0.407577	0.385995	Brdt	1	MF
GO:0140033	GO:0140033	acetylation-dependent protein binding	1/161	17/22707	0.113973	0.407577	0.385995	Brdt	1	MF
GO:0008276	GO:0008276	protein methyltransferase activity	2/161	84/22707	0.119724	0.414732	0.392772	Ntmt1/Setd7	2	MF
GO:0004935	GO:0004935	adrenergic receptor activity	1/161	18/22707	0.12026	0.414732	0.392772	Adrb1	1	MF
GO:0016209	GO:0016209	antioxidant activity	2/161	86/22707	0.124414	0.414732	0.392772	Apom/S100a8	2	MF
GO:0016500	GO:0016500	protein-hormone receptor activity	1/161	19/22707	0.126502	0.414732	0.392772	Mup1	1	MF
GO:0035014	GO:0035014	phosphatidylinositol 3-kinase regulator activity	1/161	19/22707	0.126502	0.414732	0.392772	Pik3r5	1	MF
GO:0036041	GO:0036041	long-chain fatty acid binding	1/161	19/22707	0.126502	0.414732	0.392772	S100a8	1	MF
GO:0043395	GO:0043395	heparan sulfate proteoglycan binding	1/161	19/22707	0.126502	0.414732	0.392772	Fst	1	MF
GO:0008170	GO:0008170	N-methyltransferase activity	2/161	89/22707	0.131531	0.414732	0.392772	Nnmt/Setd7	2	MF
GO:0001614	GO:0001614	purinergic nucleotide receptor activity	1/161	20/22707	0.132701	0.414732	0.392772	P2ry13	1	MF
GO:0005242	GO:0005242	inward rectifier potassium channel activity	1/161	20/22707	0.132701	0.414732	0.392772	Kcnj9	1	MF
GO:0015125	GO:0015125	bile acid transmembrane transporter activity	1/161	20/22707	0.132701	0.414732	0.392772	Slco1a1	1	MF
GO:0016502	GO:0016502	nucleotide receptor activity	1/161	20/22707	0.132701	0.414732	0.392772	P2ry13	1	MF
GO:0070696	GO:0070696	transmembrane receptor protein serine/threonine kinase binding	1/161	20/22707	0.132701	0.414732	0.392772	Nodal	1	MF
GO:0004032	GO:0004032	alditol:NADP+ 1-oxidoreductase activity	1/161	21/22707	0.138856	0.414732	0.392772	Adh4	1	MF
GO:0004745	GO:0004745	retinol dehydrogenase activity	1/161	21/22707	0.138856	0.414732	0.392772	Adh4	1	MF
GO:0019200	GO:0019200	carbohydrate kinase activity	1/161	21/22707	0.138856	0.414732	0.392772	Gck	1	MF
GO:0031690	GO:0031690	adrenergic receptor binding	1/161	21/22707	0.138856	0.414732	0.392772	Adrb1	1	MF
GO:1901338	GO:1901338	catecholamine binding	1/161	21/22707	0.138856	0.414732	0.392772	Adrb1	1	MF
GO:0008080	GO:0008080	N-acetyltransferase activity	2/161	93/22707	0.141162	0.414732	0.392772	Nat8/Nat8f5	2	MF
GO:0008553	GO:0008553	proton-exporting ATPase activity, phosphorylative mechanism	1/161	22/22707	0.144967	0.414732	0.392772	Atp4a	1	MF
GO:0015295	GO:0015295	solute:proton symporter activity	1/161	22/22707	0.144967	0.414732	0.392772	Slc15a5	1	MF
GO:0015464	GO:0015464	acetylcholine receptor activity	1/161	22/22707	0.144967	0.414732	0.392772	Chrm3	1	MF
GO:0019865	GO:0019865	immunoglobulin binding	1/161	22/22707	0.144967	0.414732	0.392772	Jchain	1	MF
GO:0004896	GO:0004896	cytokine receptor activity	2/161	97/22707	0.150938	0.416793	0.394723	Csf3r/Gfra2	2	MF
GO:0003688	GO:0003688	DNA replication origin binding	1/161	23/22707	0.151036	0.416793	0.394723	Mcm10	1	MF
GO:0016725	GO:0016725	oxidoreductase activity, acting on CH or CH2 groups	1/161	23/22707	0.151036	0.416793	0.394723	Cyp3a16	1	MF
GO:0000217	GO:0000217	DNA secondary structure binding	1/161	24/22707	0.157061	0.416793	0.394723	Rad51b	1	MF
GO:0016628	GO:0016628	oxidoreductase activity, acting on the CH-CH group of donors, NAD or NADP as acceptor	1/161	24/22707	0.157061	0.416793	0.394723	Tm7sf2	1	MF
GO:0031210	GO:0031210	phosphatidylcholine binding	1/161	24/22707	0.157061	0.416793	0.394723	Jchain	1	MF
GO:0031683	GO:0031683	G-protein beta/gamma-subunit complex binding	1/161	24/22707	0.157061	0.416793	0.394723	Gnat1	1	MF
GO:0050997	GO:0050997	quaternary ammonium group binding	1/161	24/22707	0.157061	0.416793	0.394723	Jchain	1	MF
GO:0004553	GO:0004553	hydrolase activity, hydrolyzing O-glycosyl compounds	2/161	100/22707	0.158356	0.416793	0.394723	Afp/Treh	2	MF
GO:1990782	GO:1990782	protein tyrosine kinase binding	2/161	100/22707	0.158356	0.416793	0.394723	Bank1/Ptpn22	2	MF
GO:0005212	GO:0005212	structural constituent of eye lens	1/161	25/22707	0.163044	0.421182	0.39888	Crygn	1	MF
GO:0047617	GO:0047617	acyl-CoA hydrolase activity	1/161	25/22707	0.163044	0.421182	0.39888	Acnat2	1	MF
GO:0005085	GO:0005085	guanyl-nucleotide exchange factor activity	3/161	197/22707	0.164562	0.421182	0.39888	Tiam2/Adrb1/Fgd3	3	MF
GO:0008168	GO:0008168	methyltransferase activity	3/161	199/22707	0.168008	0.421182	0.39888	Nnmt/Ntmt1/Setd7	3	MF
GO:0000030	GO:0000030	mannosyltransferase activity	1/161	26/22707	0.168985	0.421182	0.39888	Dpy19l3	1	MF
GO:0003887	GO:0003887	DNA-directed DNA polymerase activity	1/161	26/22707	0.168985	0.421182	0.39888	Dntt	1	MF
GO:0030547	GO:0030547	receptor inhibitor activity	1/161	26/22707	0.168985	0.421182	0.39888	Fst	1	MF
GO:0004866	GO:0004866	endopeptidase inhibitor activity	3/161	201/22707	0.171476	0.421729	0.399398	Itih5/Serpina12/Serpina1e	3	MF
GO:0004806	GO:0004806	triglyceride lipase activity	1/161	27/22707	0.174884	0.421729	0.399398	Pnliprp1	1	MF
GO:0016289	GO:0016289	CoA hydrolase activity	1/161	27/22707	0.174884	0.421729	0.399398	Acnat2	1	MF
GO:0008514	GO:0008514	organic anion transmembrane transporter activity	3/161	204/22707	0.176715	0.421729	0.399398	Slc22a7/Slc43a1/Slco1a1	3	MF
GO:0005543	GO:0005543	phospholipid binding	5/161	419/22707	0.177632	0.421729	0.399398	Apoc3/Apom/Baiap3/Jchain/Pla2g7	5	MF
GO:0001530	GO:0001530	lipopolysaccharide binding	1/161	28/22707	0.180741	0.421729	0.399398	Cd6	1	MF
GO:0005520	GO:0005520	insulin-like growth factor binding	1/161	28/22707	0.180741	0.421729	0.399398	Igfbp1	1	MF
GO:0033612	GO:0033612	receptor serine/threonine kinase binding	1/161	28/22707	0.180741	0.421729	0.399398	Nodal	1	MF
GO:1904680	GO:1904680	peptide transmembrane transporter activity	1/161	28/22707	0.180741	0.421729	0.399398	Slc15a5	1	MF
GO:0061135	GO:0061135	endopeptidase regulator activity	3/161	209/22707	0.185546	0.427987	0.405324	Itih5/Serpina12/Serpina1e	3	MF
GO:0008106	GO:0008106	alcohol dehydrogenase (NADP+) activity	1/161	29/22707	0.186557	0.427987	0.405324	Adh4	1	MF
GO:0016741	GO:0016741	transferase activity, transferring one-carbon groups	3/161	210/22707	0.187326	0.427987	0.405324	Nnmt/Ntmt1/Setd7	3	MF
GO:0004190	GO:0004190	aspartic-type endopeptidase activity	1/161	30/22707	0.192332	0.430528	0.407731	Ctse	1	MF
GO:0070325	GO:0070325	lipoprotein particle receptor binding	1/161	30/22707	0.192332	0.430528	0.407731	Apoc3	1	MF
GO:0140375	GO:0140375	immune receptor activity	2/161	114/22707	0.193764	0.430528	0.407731	Csf3r/Gfra2	2	MF
GO:0016407	GO:0016407	acetyltransferase activity	2/161	115/22707	0.196333	0.430528	0.407731	Nat8/Nat8f5	2	MF
GO:0004623	GO:0004623	phospholipase A2 activity	1/161	31/22707	0.198066	0.430528	0.407731	Pla2g7	1	MF
GO:0070001	GO:0070001	aspartic-type peptidase activity	1/161	31/22707	0.198066	0.430528	0.407731	Ctse	1	MF
GO:0005550	GO:0005550	pheromone binding	3/161	216/22707	0.198097	0.430528	0.407731	Mup1/Mup17/Mup3	3	MF
GO:0030165	GO:0030165	PDZ domain binding	2/161	116/22707	0.198906	0.430528	0.407731	Adrb1/Kcnj9	2	MF
GO:0004033	GO:0004033	aldo-keto reductase (NADP) activity	1/161	32/22707	0.20376	0.430607	0.407805	Adh4	1	MF
GO:0005501	GO:0005501	retinoid binding	1/161	32/22707	0.20376	0.430607	0.407805	Adh4	1	MF
GO:0030594	GO:0030594	neurotransmitter receptor activity	2/161	118/22707	0.204066	0.430607	0.407805	Chrm3/Adrb1	2	MF
GO:0022853	GO:0022853	active ion transmembrane transporter activity	3/161	221/22707	0.207187	0.430607	0.407805	Atp4a/Slc15a5/Slco1a1	3	MF
GO:0015078	GO:0015078	proton transmembrane transporter activity	2/161	120/22707	0.20924	0.430607	0.407805	Atp4a/Slc15a5	2	MF
GO:0009678	GO:0009678	pyrophosphate hydrolysis-driven proton transmembrane transporter activity	1/161	33/22707	0.209414	0.430607	0.407805	Atp4a	1	MF
GO:0015175	GO:0015175	neutral amino acid transmembrane transporter activity	1/161	33/22707	0.209414	0.430607	0.407805	Slc43a1	1	MF
GO:0034061	GO:0034061	DNA polymerase activity	1/161	33/22707	0.209414	0.430607	0.407805	Dntt	1	MF
GO:0016298	GO:0016298	lipase activity	2/161	122/22707	0.214428	0.436691	0.413568	Pla2g7/Pnliprp1	2	MF
GO:0070330	GO:0070330	aromatase activity	1/161	34/22707	0.215027	0.436691	0.413568	Cyp3a16	1	MF
GO:1901567	GO:1901567	fatty acid derivative binding	1/161	35/22707	0.220601	0.445263	0.421686	S100a8	1	MF
GO:0016798	GO:0016798	hydrolase activity, acting on glycosyl bonds	2/161	125/22707	0.222232	0.445502	0.421912	Afp/Treh	2	MF
GO:0003755	GO:0003755	peptidyl-prolyl cis-trans isomerase activity	1/161	36/22707	0.226136	0.445502	0.421912	Fkbp11	1	MF
GO:0016655	GO:0016655	oxidoreductase activity, acting on NAD(P)H, quinone or similar compound as acceptor	1/161	36/22707	0.226136	0.445502	0.421912	Adh4	1	MF
GO:0071949	GO:0071949	FAD binding	1/161	36/22707	0.226136	0.445502	0.421912	Sqle	1	MF
GO:0043394	GO:0043394	proteoglycan binding	1/161	37/22707	0.231632	0.448288	0.424551	Fst	1	MF
GO:0051393	GO:0051393	alpha-actinin binding	1/161	37/22707	0.231632	0.448288	0.424551	Cacna1c	1	MF
GO:0004713	GO:0004713	protein tyrosine kinase activity	2/161	130/22707	0.235287	0.448288	0.424551	Mup1/Ptk6	2	MF
GO:0015662	GO:0015662	ion transmembrane transporter activity, phosphorylative mechanism	1/161	38/22707	0.237089	0.448288	0.424551	Atp4a	1	MF
GO:0019840	GO:0019840	isoprenoid binding	1/161	38/22707	0.237089	0.448288	0.424551	Adh4	1	MF
GO:0031369	GO:0031369	translation initiation factor binding	1/161	38/22707	0.237089	0.448288	0.424551	Cacna1c	1	MF
GO:0051721	GO:0051721	protein phosphatase 2A binding	1/161	38/22707	0.237089	0.448288	0.424551	Cacna1c	1	MF
GO:0004864	GO:0004864	protein phosphatase inhibitor activity	1/161	39/22707	0.242507	0.451484	0.427577	Ppp1r14a	1	MF
GO:0060590	GO:0060590	ATPase regulator activity	1/161	39/22707	0.242507	0.451484	0.427577	Atpif1	1	MF
GO:0004993	GO:0004993	G protein-coupled serotonin receptor activity	1/161	40/22707	0.247887	0.451484	0.427577	Chrm3	1	MF
GO:0016859	GO:0016859	cis-trans isomerase activity	1/161	40/22707	0.247887	0.451484	0.427577	Fkbp11	1	MF
GO:0043531	GO:0043531	ADP binding	1/161	40/22707	0.247887	0.451484	0.427577	Gck	1	MF
GO:0099589	GO:0099589	serotonin receptor activity	1/161	40/22707	0.247887	0.451484	0.427577	Chrm3	1	MF
GO:0005319	GO:0005319	lipid transporter activity	2/161	135/22707	0.248385	0.451484	0.427577	Apom/Slco1a1	2	MF
GO:0044325	GO:0044325	ion channel binding	2/161	136/22707	0.251008	0.453745	0.429718	Cacna1c/S100a10	2	MF
GO:0043548	GO:0043548	phosphatidylinositol 3-kinase binding	1/161	41/22707	0.253229	0.455259	0.431152	Fam83a	1	MF
GO:0042887	GO:0042887	amide transmembrane transporter activity	1/161	42/22707	0.258534	0.461651	0.437206	Slc15a5	1	MF
GO:0015077	GO:0015077	monovalent inorganic cation transmembrane transporter activity	4/161	365/22707	0.260315	0.461651	0.437206	Atp4a/Slc15a5/Cnnm4/Kcnj9	4	MF
GO:0018024	GO:0018024	histone-lysine N-methyltransferase activity	1/161	43/22707	0.263801	0.461651	0.437206	Setd7	1	MF
GO:0019212	GO:0019212	phosphatase inhibitor activity	1/161	43/22707	0.263801	0.461651	0.437206	Ppp1r14a	1	MF
GO:1901618	GO:1901618	organic hydroxy compound transmembrane transporter activity	1/161	43/22707	0.263801	0.461651	0.437206	Slco1a1	1	MF
GO:0022843	GO:0022843	voltage-gated cation channel activity	2/161	143/22707	0.269384	0.46646	0.44176	Cacna1c/Kcnj9	2	MF
GO:0034987	GO:0034987	immunoglobulin receptor binding	2/161	143/22707	0.269384	0.46646	0.44176	Ighv8-8/Jchain	2	MF
GO:0015081	GO:0015081	sodium ion transmembrane transporter activity	2/161	144/22707	0.27201	0.467062	0.44233	Atp4a/Cnnm4	2	MF
GO:0004715	GO:0004715	non-membrane spanning protein tyrosine kinase activity	1/161	45/22707	0.274223	0.467062	0.44233	Ptk6	1	MF
GO:0005504	GO:0005504	fatty acid binding	1/161	45/22707	0.274223	0.467062	0.44233	S100a8	1	MF
GO:0016790	GO:0016790	thiolester hydrolase activity	1/161	46/22707	0.279379	0.467062	0.44233	Acnat2	1	MF
GO:0008083	GO:0008083	growth factor activity	2/161	147/22707	0.279885	0.467062	0.44233	Nodal/Inhbb	2	MF
GO:0008757	GO:0008757	S-adenosylmethionine-dependent methyltransferase activity	2/161	147/22707	0.279885	0.467062	0.44233	Nnmt/Setd7	2	MF
GO:0019838	GO:0019838	growth factor binding	2/161	147/22707	0.279885	0.467062	0.44233	Csf3r/Igfbp1	2	MF
GO:0005342	GO:0005342	organic acid transmembrane transporter activity	2/161	148/22707	0.282508	0.467062	0.44233	Slc43a1/Slco1a1	2	MF
GO:0046943	GO:0046943	carboxylic acid transmembrane transporter activity	2/161	148/22707	0.282508	0.467062	0.44233	Slc43a1/Slco1a1	2	MF
GO:0042805	GO:0042805	actinin binding	1/161	48/22707	0.289583	0.476364	0.45114	Cacna1c	1	MF
GO:0019829	GO:0019829	ATPase-coupled cation transmembrane transporter activity	1/161	49/22707	0.294631	0.482256	0.45672	Atp4a	1	MF
GO:0005245	GO:0005245	voltage-gated calcium channel activity	1/161	50/22707	0.299643	0.488032	0.46219	Cacna1c	1	MF
GO:0042625	GO:0042625	ATPase-coupled ion transmembrane transporter activity	1/161	51/22707	0.30462	0.49362	0.467482	Atp4a	1	MF
GO:0015079	GO:0015079	potassium ion transmembrane transporter activity	2/161	157/22707	0.306074	0.49362	0.467482	Atp4a/Kcnj9	2	MF
GO:0008028	GO:0008028	monocarboxylic acid transmembrane transporter activity	1/161	52/22707	0.309561	0.496808	0.470501	Slco1a1	1	MF
GO:0016278	GO:0016278	lysine N-methyltransferase activity	1/161	55/22707	0.324177	0.508939	0.48199	Setd7	1	MF
GO:0016279	GO:0016279	protein-lysine N-methyltransferase activity	1/161	55/22707	0.324177	0.508939	0.48199	Setd7	1	MF
GO:0016836	GO:0016836	hydro-lyase activity	1/161	55/22707	0.324177	0.508939	0.48199	Car1	1	MF
GO:0099529	GO:0099529	neurotransmitter receptor activity involved in regulation of postsynaptic membrane potential	1/161	55/22707	0.324177	0.508939	0.48199	Adrb1	1	MF
GO:0008146	GO:0008146	sulfotransferase activity	1/161	56/22707	0.328981	0.508939	0.48199	Sult1b1	1	MF
GO:0016627	GO:0016627	oxidoreductase activity, acting on the CH-CH group of donors	1/161	56/22707	0.328981	0.508939	0.48199	Tm7sf2	1	MF
GO:0017048	GO:0017048	Rho GTPase binding	2/161	166/22707	0.329496	0.508939	0.48199	Tiam2/Fgd3	2	MF
GO:0019903	GO:0019903	protein phosphatase binding	2/161	166/22707	0.329496	0.508939	0.48199	Cacna1c/Gck	2	MF
GO:0015179	GO:0015179	L-amino acid transmembrane transporter activity	1/161	57/22707	0.33375	0.513102	0.485933	Slc43a1	1	MF
GO:0030145	GO:0030145	manganese ion binding	1/161	59/22707	0.343189	0.525158	0.49735	Idi1	1	MF
GO:0004714	GO:0004714	transmembrane receptor protein tyrosine kinase activity	1/161	60/22707	0.347858	0.525715	0.497878	Mup1	1	MF
GO:0005507	GO:0005507	copper ion binding	1/161	60/22707	0.347858	0.525715	0.497878	Mt1	1	MF
GO:0060589	GO:0060589	nucleoside-triphosphatase regulator activity	3/161	295/22707	0.348346	0.525715	0.497878	Atpif1/Tiam2/Rasal3	3	MF
GO:0042165	GO:0042165	neurotransmitter binding	1/161	61/22707	0.352494	0.529546	0.501505	Chrm3	1	MF
GO:0016712	GO:0016712	oxidoreductase activity, acting on paired donors, with incorporation or reduction of molecular oxygen, reduced flavin or flavoprotein as one donor, and incorporation of one atom of oxygen	1/161	62/22707	0.357097	0.534023	0.505745	Cyp3a16	1	MF
GO:0046873	GO:0046873	metal ion transmembrane transporter activity	4/161	427/22707	0.359003	0.534443	0.506143	Atp4a/Cacna1c/Cnnm4/Kcnj9	4	MF
GO:0030674	GO:0030674	protein-macromolecule adaptor activity	2/161	183/22707	0.373094	0.552918	0.52364	Tchh/Jchain	2	MF
GO:0016835	GO:0016835	carbon-oxygen lyase activity	1/161	67/22707	0.379631	0.560083	0.530426	Car1	1	MF
GO:0033293	GO:0033293	monocarboxylic acid binding	1/161	69/22707	0.388423	0.568013	0.537936	S100a8	1	MF
GO:0008509	GO:0008509	anion transmembrane transporter activity	3/161	318/22707	0.392627	0.568013	0.537936	Slc22a7/Slc43a1/Slco1a1	3	MF
GO:0001085	GO:0001085	RNA polymerase II transcription factor binding	1/161	70/22707	0.392772	0.568013	0.537936	Pitx3	1	MF
GO:0005244	GO:0005244	voltage-gated ion channel activity	2/161	192/22707	0.395724	0.568013	0.537936	Cacna1c/Kcnj9	2	MF
GO:0022832	GO:0022832	voltage-gated channel activity	2/161	192/22707	0.395724	0.568013	0.537936	Cacna1c/Kcnj9	2	MF
GO:0002039	GO:0002039	p53 binding	1/161	71/22707	0.397091	0.568013	0.537936	Setd7	1	MF
GO:0019888	GO:0019888	protein phosphatase regulator activity	1/161	71/22707	0.397091	0.568013	0.537936	Ppp1r14a	1	MF
GO:0015171	GO:0015171	amino acid transmembrane transporter activity	1/161	73/22707	0.405637	0.577726	0.547134	Slc43a1	1	MF
GO:0016782	GO:0016782	transferase activity, transferring sulfur-containing groups	1/161	74/22707	0.409865	0.581231	0.550454	Sult1b1	1	MF
GO:0051015	GO:0051015	actin filament binding	2/161	200/22707	0.415525	0.586728	0.55566	Tnnc1/Tmod4	2	MF
GO:0019199	GO:0019199	transmembrane receptor protein kinase activity	1/161	77/22707	0.42237	0.593845	0.5624	Mup1	1	MF
GO:0003823	GO:0003823	antigen binding	2/161	204/22707	0.425305	0.594542	0.56306	Ighv8-8/Jchain	2	MF
GO:0019905	GO:0019905	syntaxin binding	1/161	78/22707	0.42648	0.594542	0.56306	Baiap3	1	MF
GO:0016651	GO:0016651	oxidoreductase activity, acting on NAD(P)H	1/161	80/22707	0.434612	0.603322	0.571375	Adh4	1	MF
GO:0022804	GO:0022804	active transmembrane transporter activity	3/161	343/22707	0.439865	0.607773	0.57559	Atp4a/Slc15a5/Slco1a1	3	MF
GO:0050660	GO:0050660	flavin adenine dinucleotide binding	1/161	82/22707	0.442629	0.607773	0.57559	Sqle	1	MF
GO:0019902	GO:0019902	phosphatase binding	2/161	213/22707	0.446995	0.607773	0.57559	Cacna1c/Gck	2	MF
GO:0016811	GO:0016811	hydrolase activity, acting on carbon-nitrogen (but not peptide) bonds, in linear amides	1/161	84/22707	0.450534	0.607773	0.57559	Klk1	1	MF
GO:0019208	GO:0019208	phosphatase regulator activity	1/161	84/22707	0.450534	0.607773	0.57559	Ppp1r14a	1	MF
GO:0043178	GO:0043178	alcohol binding	1/161	84/22707	0.450534	0.607773	0.57559	Adh4	1	MF
GO:0005125	GO:0005125	cytokine activity	2/161	215/22707	0.451753	0.607773	0.57559	Nodal/Inhbb	2	MF
GO:0005249	GO:0005249	voltage-gated potassium channel activity	1/161	85/22707	0.454444	0.607773	0.57559	Kcnj9	1	MF
GO:0048029	GO:0048029	monosaccharide binding	1/161	85/22707	0.454444	0.607773	0.57559	Gck	1	MF
GO:0005525	GO:0005525	GTP binding	3/161	354/22707	0.460222	0.613008	0.580548	Gnat1/Gbp8/Gimap3	3	MF
GO:0004620	GO:0004620	phospholipase activity	1/161	88/22707	0.46601	0.618215	0.585479	Pla2g7	1	MF
GO:0032550	GO:0032550	purine ribonucleoside binding	3/161	361/22707	0.473013	0.624985	0.591891	Gnat1/Gbp8/Gimap3	3	MF
GO:0051117	GO:0051117	ATPase binding	1/161	91/22707	0.477332	0.627008	0.593807	Atpif1	1	MF
GO:0032549	GO:0032549	ribonucleoside binding	3/161	364/22707	0.478454	0.627008	0.593807	Gnat1/Gbp8/Gimap3	3	MF
GO:0001883	GO:0001883	purine nucleoside binding	3/161	365/22707	0.480261	0.627008	0.593807	Gnat1/Gbp8/Gimap3	3	MF
GO:0015291	GO:0015291	secondary active transmembrane transporter activity	2/161	233/22707	0.493508	0.634928	0.601307	Slc15a5/Slco1a1	2	MF
GO:0004725	GO:0004725	protein tyrosine phosphatase activity	1/161	96/22707	0.495675	0.634928	0.601307	Ptpn22	1	MF
GO:0001882	GO:0001882	nucleoside binding	3/161	374/22707	0.496398	0.634928	0.601307	Gnat1/Gbp8/Gimap3	3	MF
GO:0004197	GO:0004197	cysteine-type endopeptidase activity	1/161	97/22707	0.499266	0.634928	0.601307	Capn8	1	MF
GO:0051082	GO:0051082	unfolded protein binding	1/161	97/22707	0.499266	0.634928	0.601307	Pet100	1	MF
GO:0019001	GO:0019001	guanyl nucleotide binding	3/161	377/22707	0.501722	0.634928	0.601307	Gnat1/Gbp8/Gimap3	3	MF
GO:0032561	GO:0032561	guanyl ribonucleotide binding	3/161	377/22707	0.501722	0.634928	0.601307	Gnat1/Gbp8/Gimap3	3	MF
GO:0005096	GO:0005096	GTPase activator activity	2/161	238/22707	0.504749	0.634928	0.601307	Tiam2/Rasal3	2	MF
GO:0099094	GO:0099094	ligand-gated cation channel activity	1/161	99/22707	0.506372	0.634928	0.601307	Kcnj9	1	MF
GO:0004222	GO:0004222	metalloendopeptidase activity	1/161	100/22707	0.509887	0.634928	0.601307	Adam11	1	MF
GO:0008094	GO:0008094	DNA-dependent ATPase activity	1/161	100/22707	0.509887	0.634928	0.601307	Rad51b	1	MF
GO:0015294	GO:0015294	solute:cation symporter activity	1/161	100/22707	0.509887	0.634928	0.601307	Slc15a5	1	MF
GO:0050839	GO:0050839	cell adhesion molecule binding	2/161	241/22707	0.511416	0.634928	0.601307	Itgal/Nlgn2	2	MF
GO:0042626	GO:0042626	ATPase-coupled transmembrane transporter activity	1/161	101/22707	0.513377	0.634967	0.601344	Atp4a	1	MF
GO:0042562	GO:0042562	hormone binding	1/161	106/22707	0.530462	0.653641	0.61903	Chrm3	1	MF
GO:0005496	GO:0005496	steroid binding	1/161	108/22707	0.537128	0.659385	0.62447	Hsd3b5	1	MF
GO:0015399	GO:0015399	primary active transmembrane transporter activity	1/161	109/22707	0.540426	0.660967	0.625968	Atp4a	1	MF
GO:0030695	GO:0030695	GTPase regulator activity	2/161	256/22707	0.543864	0.662708	0.627617	Tiam2/Rasal3	2	MF
GO:0060090	GO:0060090	molecular adaptor activity	2/161	258/22707	0.548077	0.665377	0.630144	Tchh/Jchain	2	MF
GO:0017016	GO:0017016	Ras GTPase binding	3/161	409/22707	0.55665	0.673301	0.637648	Tiam2/Adrb1/Fgd3	3	MF
GO:0000149	GO:0000149	SNARE binding	1/161	118/22707	0.569073	0.685806	0.649492	Baiap3	1	MF
GO:0005262	GO:0005262	calcium channel activity	1/161	120/22707	0.575194	0.690653	0.654082	Cacna1c	1	MF
GO:0005267	GO:0005267	potassium channel activity	1/161	121/22707	0.578222	0.691764	0.655134	Kcnj9	1	MF
GO:0031267	GO:0031267	small GTPase binding	3/161	424/22707	0.581134	0.692729	0.656048	Tiam2/Adrb1/Fgd3	3	MF
GO:0016779	GO:0016779	nucleotidyltransferase activity	1/161	123/22707	0.584214	0.693886	0.657144	Dntt	1	MF
GO:0005179	GO:0005179	hormone activity	1/161	128/22707	0.598826	0.706982	0.669546	Inhbb	1	MF
GO:0017124	GO:0017124	SH3 domain binding	1/161	129/22707	0.601687	0.706982	0.669546	Ptpn22	1	MF
GO:0019955	GO:0019955	cytokine binding	1/161	129/22707	0.601687	0.706982	0.669546	Csf3r	1	MF
GO:0001228	GO:0001228	DNA-binding transcription activator activity, RNA polymerase II-specific	3/161	439/22707	0.604757	0.707351	0.669896	Mycl/Onecut1/Pitx3	3	MF
GO:0001216	GO:0001216	DNA-binding transcription activator activity	3/161	440/22707	0.606301	0.707351	0.669896	Mycl/Onecut1/Pitx3	3	MF
GO:0015276	GO:0015276	ligand-gated ion channel activity	1/161	133/22707	0.612928	0.710189	0.672583	Kcnj9	1	MF
GO:0003924	GO:0003924	GTPase activity	2/161	291/22707	0.613635	0.710189	0.672583	Gnat1/Gbp8	2	MF
GO:0016810	GO:0016810	hydrolase activity, acting on carbon-nitrogen (but not peptide) bonds	1/161	134/22707	0.615688	0.710189	0.672583	Klk1	1	MF
GO:0001664	GO:0001664	G protein-coupled receptor binding	2/161	293/22707	0.617368	0.710189	0.672583	Gnat1/Adrb1	2	MF
GO:0022834	GO:0022834	ligand-gated channel activity	1/161	136/22707	0.621151	0.710951	0.673305	Kcnj9	1	MF
GO:0015085	GO:0015085	calcium ion transmembrane transporter activity	1/161	137/22707	0.623853	0.710951	0.673305	Cacna1c	1	MF
GO:0008047	GO:0008047	enzyme activator activity	3/161	452/22707	0.624514	0.710951	0.673305	Tiam2/Wfdc21/Rasal3	3	MF
GO:0004674	GO:0004674	protein serine/threonine kinase activity	3/161	456/22707	0.630456	0.714355	0.676529	Hunk/Irak3/Prkcq	3	MF
GO:0005201	GO:0005201	extracellular matrix structural constituent	1/161	140/22707	0.631846	0.714355	0.676529	Dmbt1	1	MF
GO:0015293	GO:0015293	symporter activity	1/161	145/22707	0.644794	0.726497	0.688028	Slc15a5	1	MF
GO:0002020	GO:0002020	protease binding	1/161	146/22707	0.647328	0.726864	0.688375	Serpina1e	1	MF
GO:0005126	GO:0005126	cytokine receptor binding	2/161	327/22707	0.676643	0.756442	0.716388	Nodal/Inhbb	2	MF
GO:0005261	GO:0005261	cation channel activity	2/161	328/22707	0.678269	0.756442	0.716388	Cacna1c/Kcnj9	2	MF
GO:0022836	GO:0022836	gated channel activity	2/161	331/22707	0.683106	0.759263	0.719059	Cacna1c/Kcnj9	2	MF
GO:0004721	GO:0004721	phosphoprotein phosphatase activity	1/161	171/22707	0.705171	0.780853	0.739505	Ptpn22	1	MF
GO:0008234	GO:0008234	cysteine-type peptidase activity	1/161	172/22707	0.707277	0.780853	0.739505	Capn8	1	MF
GO:0008237	GO:0008237	metallopeptidase activity	1/161	175/22707	0.713506	0.785096	0.743524	Adam11	1	MF
GO:0140030	GO:0140030	modification-dependent protein binding	1/161	185/22707	0.733336	0.804225	0.76164	Brdt	1	MF
GO:0003714	GO:0003714	transcription corepressor activity	1/161	188/22707	0.739014	0.806465	0.763762	Hsbp1l1	1	MF
GO:0005516	GO:0005516	calmodulin binding	1/161	190/22707	0.742732	0.806465	0.763762	Cacna1c	1	MF
GO:0140097	GO:0140097	catalytic activity, acting on DNA	1/161	190/22707	0.742732	0.806465	0.763762	Dntt	1	MF
GO:0019207	GO:0019207	kinase regulator activity	1/161	194/22707	0.750012	0.811691	0.768711	Pik3r5	1	MF
GO:0005539	GO:0005539	glycosaminoglycan binding	1/161	208/22707	0.773917	0.829377	0.78546	Jchain	1	MF
GO:0016758	GO:0016758	transferase activity, transferring hexosyl groups	1/161	208/22707	0.773917	0.829377	0.78546	Dpy19l3	1	MF
GO:0031406	GO:0031406	carboxylic acid binding	1/161	208/22707	0.773917	0.829377	0.78546	S100a8	1	MF
GO:0043177	GO:0043177	organic acid binding	1/161	223/22707	0.797012	0.851354	0.806274	S100a8	1	MF
GO:0005216	GO:0005216	ion channel activity	2/161	419/22707	0.800301	0.852101	0.806981	Cacna1c/Kcnj9	2	MF
GO:0003779	GO:0003779	actin binding	2/161	428/22707	0.809833	0.855471	0.810172	Tnnc1/Tmod4	2	MF
GO:0042393	GO:0042393	histone binding	1/161	233/22707	0.811091	0.855471	0.810172	Brdt	1	MF
GO:0008022	GO:0008022	protein C-terminus binding	1/161	234/22707	0.812444	0.855471	0.810172	Sarnp	1	MF
GO:0001217	GO:0001217	DNA-binding transcription repressor activity	1/161	238/22707	0.817762	0.855471	0.810172	Sarnp	1	MF
GO:0001227	GO:0001227	DNA-binding transcription repressor activity, RNA polymerase II-specific	1/161	238/22707	0.817762	0.855471	0.810172	Sarnp	1	MF
GO:0008017	GO:0008017	microtubule binding	1/161	239/22707	0.819068	0.855471	0.810172	S100a8	1	MF
GO:0015267	GO:0015267	channel activity	2/161	451/22707	0.832384	0.861641	0.816015	Cacna1c/Kcnj9	2	MF
GO:0022803	GO:0022803	passive transmembrane transporter activity	2/161	451/22707	0.832384	0.861641	0.816015	Cacna1c/Kcnj9	2	MF
GO:1901681	GO:1901681	sulfur compound binding	1/161	250/22707	0.832832	0.861641	0.816015	Fst	1	MF
GO:0016791	GO:0016791	phosphatase activity	1/161	265/22707	0.849939	0.876583	0.830167	Ptpn22	1	MF
GO:0030246	GO:0030246	carbohydrate binding	1/161	270/22707	0.855246	0.8793	0.832739	Gck	1	MF
GO:0016757	GO:0016757	transferase activity, transferring glycosyl groups	1/161	276/22707	0.861368	0.882835	0.836088	Dpy19l3	1	MF
GO:0048018	GO:0048018	receptor ligand activity	2/161	489/22707	0.864429	0.88322	0.836453	Nodal/Inhbb	2	MF
GO:0030546	GO:0030546	signaling receptor activator activity	2/161	495/22707	0.868946	0.885087	0.838221	Nodal/Inhbb	2	MF
GO:0031625	GO:0031625	ubiquitin protein ligase binding	1/161	306/22707	0.888327	0.902035	0.854271	Ptpn22	1	MF
GO:0044389	GO:0044389	ubiquitin-like protein ligase binding	1/161	325/22707	0.902634	0.913744	0.86536	Ptpn22	1	MF
GO:0015631	GO:0015631	tubulin binding	1/161	336/22707	0.910069	0.918444	0.869811	S100a8	1	MF
GO:0042578	GO:0042578	phosphoric ester hydrolase activity	1/161	355/22707	0.921605	0.927242	0.878143	Ptpn22	1	MF
GO:0016887	GO:0016887	ATPase activity	1/161	418/22707	0.950316	0.953213	0.902739	Rad51b	1	MF
GO:0003712	GO:0003712	transcription coregulator activity	1/161	454/22707	0.961736	0.961736	0.910811	Hsbp1l1	1	MF

## Sheet: CC
	ID	Description	GeneRatio	BgRatio	pvalue	p.adjust	qvalue	geneID	Count	category
GO:0001772	GO:0001772	immunological synapse	4/170	38/23436	0.000162721	0.0320561	0.0308314	Fyb2/Cd6/Itgal/Prkcq	4	CC
GO:0034358	GO:0034358	plasma lipoprotein particle	3/170	34/23436	0.00190215	0.110599	0.106374	Apoc3/Apom/Pla2g7	3	CC
GO:1990777	GO:1990777	lipoprotein particle	3/170	34/23436	0.00190215	0.110599	0.106374	Apoc3/Apom/Pla2g7	3	CC
GO:0032994	GO:0032994	protein-lipid complex	3/170	36/23436	0.00224567	0.110599	0.106374	Apoc3/Apom/Pla2g7	3	CC
GO:0034362	GO:0034362	low-density lipoprotein particle	2/170	13/23436	0.00387133	0.15253	0.146703	Apom/Pla2g7	2	CC
GO:0042101	GO:0042101	T cell receptor complex	2/170	15/23436	0.00516204	0.169487	0.163012	Apbb1ip/Cd6	2	CC
GO:0034361	GO:0034361	very-low-density lipoprotein particle	2/170	18/23436	0.00741535	0.182603	0.175627	Apoc3/Apom	2	CC
GO:0034385	GO:0034385	triglyceride-rich plasma lipoprotein particle	2/170	18/23436	0.00741535	0.182603	0.175627	Apoc3/Apom	2	CC
GO:0098562	GO:0098562	cytoplasmic side of membrane	5/170	180/23436	0.010197	0.2232	0.214673	Diablo/Gnat1/Ptk6/Ptpn22/Rasal3	5	CC
GO:0034364	GO:0034364	high-density lipoprotein particle	2/170	23/23436	0.0119747	0.235902	0.226889	Apoc3/Apom	2	CC
GO:0005865	GO:0005865	striated muscle thin filament	2/170	30/23436	0.0199192	0.356734	0.343105	Tnnc1/Tmod4	2	CC
GO:0036379	GO:0036379	myofilament	2/170	32/23436	0.0224994	0.369365	0.355254	Tnnc1/Tmod4	2	CC
GO:0043235	GO:0043235	receptor complex	7/170	394/23436	0.0252185	0.382158	0.367558	Diablo/Tm7sf2/Apbb1ip/Cd6/Csf3r/Gfra2/Itgal	7	CC
GO:0019898	GO:0019898	extrinsic component of membrane	6/170	314/23436	0.0273265	0.384523	0.369833	Gnat1/Ptk6/S100a10/Dmbt1/Pik3r5/Syn1	6	CC
GO:0009898	GO:0009898	cytoplasmic side of plasma membrane	4/170	163/23436	0.0311705	0.409373	0.393733	Diablo/Gnat1/Ptk6/Ptpn22	4	CC
GO:0005637	GO:0005637	nuclear inner membrane	2/170	41/23436	0.0356572	0.439029	0.422256	Dpy19l3/Tm7sf2	2	CC
GO:0098802	GO:0098802	plasma membrane signaling receptor complex	4/170	181/23436	0.0431134	0.499608	0.480521	Diablo/Apbb1ip/Cd6/Itgal	4	CC
GO:0099056	GO:0099056	integral component of presynaptic membrane	3/170	116/23436	0.0524809	0.51607	0.496353	Cacna1c/Chrm3/Kcnj9	3	CC
GO:0031300	GO:0031300	intrinsic component of organelle membrane	6/170	384/23436	0.061581	0.51607	0.496353	Elovl3/Fitm1/Pet100/Rdh16f2/Tm7sf2/Syn1	6	CC
GO:0098889	GO:0098889	intrinsic component of presynaptic membrane	3/170	128/23436	0.0664608	0.51607	0.496353	Cacna1c/Chrm3/Kcnj9	3	CC
GO:0098850	GO:0098850	extrinsic component of synaptic vesicle membrane	1/170	10/23436	0.0702285	0.51607	0.496353	Syn1	1	CC
GO:0035631	GO:0035631	CD40 receptor complex	1/170	11/23436	0.0769757	0.51607	0.496353	Diablo	1	CC
GO:1990454	GO:1990454	L-type voltage-gated calcium channel complex	1/170	11/23436	0.0769757	0.51607	0.496353	Cacna1c	1	CC
GO:0099699	GO:0099699	integral component of synaptic membrane	4/170	226/23436	0.0826802	0.51607	0.496353	Cacna1c/Chrm3/Kcnj9/Nlgn2	4	CC
GO:0030176	GO:0030176	integral component of endoplasmic reticulum membrane	3/170	141/23436	0.0833106	0.51607	0.496353	Elovl3/Fitm1/Tm7sf2	3	CC
GO:0020005	GO:0020005	symbiont-containing vacuole membrane	1/170	12/23436	0.0836743	0.51607	0.496353	Gbp8	1	CC
GO:0030670	GO:0030670	phagocytic vesicle membrane	1/170	12/23436	0.0836743	0.51607	0.496353	Dmbt1	1	CC
GO:0042627	GO:0042627	chylomicron	1/170	12/23436	0.0836743	0.51607	0.496353	Apoc3	1	CC
GO:0043198	GO:0043198	dendritic shaft	2/170	67/23436	0.0852038	0.51607	0.496353	Cacna1c/Nlgn2	2	CC
GO:0005777	GO:0005777	peroxisome	3/170	143/23436	0.0860514	0.51607	0.496353	Acnat2/Idi1/Urad	3	CC
GO:0042579	GO:0042579	microbody	3/170	143/23436	0.0860514	0.51607	0.496353	Acnat2/Idi1/Urad	3	CC
GO:0000346	GO:0000346	transcription export complex	1/170	13/23436	0.0903245	0.51607	0.496353	Sarnp	1	CC
GO:0005657	GO:0005657	replication fork	2/170	71/23436	0.0940159	0.51607	0.496353	Mcm10/Rad51b	2	CC
GO:0031227	GO:0031227	intrinsic component of endoplasmic reticulum membrane	3/170	149/23436	0.0944996	0.51607	0.496353	Elovl3/Fitm1/Tm7sf2	3	CC
GO:0020003	GO:0020003	symbiont-containing vacuole	1/170	14/23436	0.0969268	0.51607	0.496353	Gbp8	1	CC
GO:0042589	GO:0042589	zymogen granule membrane	1/170	14/23436	0.0969268	0.51607	0.496353	Dmbt1	1	CC
GO:0098690	GO:0098690	glycinergic synapse	1/170	14/23436	0.0969268	0.51607	0.496353	Nlgn2	1	CC
GO:0099240	GO:0099240	intrinsic component of synaptic membrane	4/170	244/23436	0.102198	0.519898	0.500035	Cacna1c/Chrm3/Kcnj9/Nlgn2	4	CC
GO:0060076	GO:0060076	excitatory synapse	2/170	76/23436	0.105379	0.519898	0.500035	Kcnj9/Nlgn2	2	CC
GO:0065010	GO:0065010	extracellular membrane-bounded organelle	1/170	16/23436	0.109989	0.519898	0.500035	Gbp8	1	CC
GO:0098691	GO:0098691	dopaminergic synapse	1/170	16/23436	0.109989	0.519898	0.500035	Nlgn2	1	CC
GO:0031301	GO:0031301	integral component of organelle membrane	5/170	349/23436	0.110841	0.519898	0.500035	Elovl3/Fitm1/Pet100/Rdh16f2/Tm7sf2	5	CC
GO:0030430	GO:0030430	host cell cytoplasm	1/170	17/23436	0.116449	0.521374	0.501456	Gbp8	1	CC
GO:0033655	GO:0033655	host cell cytoplasm part	1/170	17/23436	0.116449	0.521374	0.501456	Gbp8	1	CC
GO:0099055	GO:0099055	integral component of postsynaptic membrane	3/170	169/23436	0.124926	0.526597	0.506479	Cacna1c/Chrm3/Nlgn2	3	CC
GO:0098993	GO:0098993	anchored component of synaptic vesicle membrane	1/170	19/23436	0.12923	0.526597	0.506479	Syn1	1	CC
GO:0098936	GO:0098936	intrinsic component of postsynaptic membrane	3/170	178/23436	0.139638	0.526597	0.506479	Cacna1c/Chrm3/Nlgn2	3	CC
GO:0033646	GO:0033646	host intracellular part	1/170	22/23436	0.148058	0.526597	0.506479	Gbp8	1	CC
GO:0043656	GO:0043656	host intracellular region	1/170	22/23436	0.148058	0.526597	0.506479	Gbp8	1	CC
GO:0000795	GO:0000795	synaptonemal complex	2/170	94/23436	0.148895	0.526597	0.506479	Xlr4a/Syn1	2	CC
GO:0099086	GO:0099086	synaptonemal structure	2/170	94/23436	0.148895	0.526597	0.506479	Xlr4a/Syn1	2	CC
GO:0019897	GO:0019897	extrinsic component of plasma membrane	3/170	186/23436	0.153181	0.526597	0.506479	Gnat1/Ptk6/S100a10	3	CC
GO:0097470	GO:0097470	ribbon synapse	1/170	23/23436	0.154244	0.526597	0.506479	Nlgn2	1	CC
GO:0030017	GO:0030017	sarcomere	3/170	189/23436	0.158364	0.526597	0.506479	Cacna1c/Tnnc1/Tmod4	3	CC
GO:0031234	GO:0031234	extrinsic component of cytoplasmic side of plasma membrane	2/170	98/23436	0.159004	0.526597	0.506479	Gnat1/Ptk6	2	CC
GO:0018995	GO:0018995	host cellular component	1/170	24/23436	0.160385	0.526597	0.506479	Gbp8	1	CC
GO:0033643	GO:0033643	host cell part	1/170	24/23436	0.160385	0.526597	0.506479	Gbp8	1	CC
GO:0042588	GO:0042588	zymogen granule	1/170	24/23436	0.160385	0.526597	0.506479	Dmbt1	1	CC
GO:0043657	GO:0043657	host cell	1/170	24/23436	0.160385	0.526597	0.506479	Gbp8	1	CC
GO:0060077	GO:0060077	inhibitory synapse	1/170	24/23436	0.160385	0.526597	0.506479	Nlgn2	1	CC
GO:0031225	GO:0031225	anchored component of membrane	3/170	192/23436	0.1636	0.528349	0.508163	Treh/Gfra2/Syn1	3	CC
GO:0098982	GO:0098982	GABA-ergic synapse	2/170	103/23436	0.171814	0.536288	0.5158	Baiap3/Nlgn2	2	CC
GO:0099524	GO:0099524	postsynaptic cytosol	1/170	26/23436	0.172534	0.536288	0.5158	Aldoc	1	CC
GO:0042734	GO:0042734	presynaptic membrane	3/170	198/23436	0.174226	0.536288	0.5158	Cacna1c/Chrm3/Kcnj9	3	CC
GO:0099060	GO:0099060	integral component of postsynaptic specialization membrane	2/170	105/23436	0.176985	0.536399	0.515906	Chrm3/Nlgn2	2	CC
GO:0005942	GO:0005942	phosphatidylinositol 3-kinase complex	1/170	28/23436	0.184509	0.54673	0.525843	Pik3r5	1	CC
GO:0098948	GO:0098948	intrinsic component of postsynaptic specialization membrane	2/170	111/23436	0.192636	0.54673	0.525843	Chrm3/Nlgn2	2	CC
GO:0098685	GO:0098685	Schaffer collateral - CA1 synapse	2/170	113/23436	0.197894	0.54673	0.525843	Adrb1/Syn1	2	CC
GO:0030016	GO:0030016	myofibril	3/170	212/23436	0.199725	0.54673	0.525843	Cacna1c/Tnnc1/Tmod4	3	CC
GO:0032588	GO:0032588	trans-Golgi network membrane	1/170	31/23436	0.202148	0.54673	0.525843	Baiap3	1	CC
GO:0042470	GO:0042470	melanosome	1/170	31/23436	0.202148	0.54673	0.525843	Dct	1	CC
GO:0048770	GO:0048770	pigment granule	1/170	31/23436	0.202148	0.54673	0.525843	Dct	1	CC
GO:0008305	GO:0008305	integrin complex	1/170	32/23436	0.207943	0.54673	0.525843	Itgal	1	CC
GO:0030666	GO:0030666	endocytic vesicle membrane	1/170	32/23436	0.207943	0.54673	0.525843	Dmbt1	1	CC
GO:0005834	GO:0005834	heterotrimeric G-protein complex	1/170	33/23436	0.213697	0.54673	0.525843	Gnat1	1	CC
GO:0098688	GO:0098688	parallel fiber to Purkinje cell synapse	1/170	33/23436	0.213697	0.54673	0.525843	Kcnj9	1	CC
GO:1905360	GO:1905360	GTPase complex	1/170	33/23436	0.213697	0.54673	0.525843	Gnat1	1	CC
GO:0008180	GO:0008180	COP9 signalosome	1/170	34/23436	0.219408	0.554147	0.532976	Cops9	1	CC
GO:0098636	GO:0098636	protein complex involved in cell adhesion	1/170	35/23436	0.225079	0.55664	0.535374	Itgal	1	CC
GO:0043292	GO:0043292	contractile fiber	3/170	226/23436	0.226047	0.55664	0.535374	Cacna1c/Tnnc1/Tmod4	3	CC
GO:0016235	GO:0016235	aggresome	1/170	40/23436	0.252823	0.592365	0.569734	Prkcq	1	CC
GO:0043596	GO:0043596	nuclear replication fork	1/170	40/23436	0.252823	0.592365	0.569734	Mcm10	1	CC
GO:0099522	GO:0099522	region of cytosol	1/170	40/23436	0.252823	0.592365	0.569734	Aldoc	1	CC
GO:0099634	GO:0099634	postsynaptic specialization membrane	2/170	134/23436	0.253868	0.592365	0.569734	Chrm3/Nlgn2	2	CC
GO:0005891	GO:0005891	voltage-gated calcium channel complex	1/170	41/23436	0.258252	0.592365	0.569734	Cacna1c	1	CC
GO:0031305	GO:0031305	integral component of mitochondrial inner membrane	1/170	42/23436	0.263642	0.592365	0.569734	Pet100	1	CC
GO:0062023	GO:0062023	collagen-containing extracellular matrix	4/170	359/23436	0.263891	0.592365	0.569734	Itih5/S100a10/Cela2a/Dmbt1	4	CC
GO:0042571	GO:0042571	immunoglobulin complex, circulating	2/170	138/23436	0.26461	0.592365	0.569734	Ighv8-8/Jchain	2	CC
GO:0031304	GO:0031304	intrinsic component of mitochondrial inner membrane	1/170	43/23436	0.268993	0.595411	0.572664	Pet100	1	CC
GO:0055038	GO:0055038	recycling endosome membrane	1/170	44/23436	0.274305	0.596095	0.573321	Baiap3	1	CC
GO:0019814	GO:0019814	immunoglobulin complex	2/170	142/23436	0.275354	0.596095	0.573321	Ighv8-8/Jchain	2	CC
GO:0032391	GO:0032391	photoreceptor connecting cilium	1/170	45/23436	0.279579	0.598664	0.575792	Gnat1	1	CC
GO:0000791	GO:0000791	euchromatin	1/170	46/23436	0.284815	0.603318	0.580268	Dntt	1	CC
GO:0030141	GO:0030141	secretory granule	4/170	383/23436	0.302609	0.634191	0.609962	Tff3/Dmbt1/Gck/Klk1	4	CC
GO:0000794	GO:0000794	condensed nuclear chromosome	2/170	155/23436	0.310178	0.64321	0.618637	Xlr4a/Syn1	2	CC
GO:0031902	GO:0031902	late endosome membrane	1/170	53/23436	0.320422	0.650753	0.625891	Baiap3	1	CC
GO:0099738	GO:0099738	cell cortex region	1/170	53/23436	0.320422	0.650753	0.625891	Gck	1	CC
GO:0042383	GO:0042383	sarcolemma	2/170	163/23436	0.331452	0.66022	0.634996	Cacna1c/Prkcq	2	CC
GO:0001917	GO:0001917	photoreceptor inner segment	1/170	56/23436	0.335137	0.66022	0.634996	Gnat1	1	CC
GO:0031312	GO:0031312	extrinsic component of organelle membrane	1/170	56/23436	0.335137	0.66022	0.634996	Syn1	1	CC
GO:0034704	GO:0034704	calcium channel complex	1/170	60/23436	0.354265	0.690993	0.664594	Cacna1c	1	CC
GO:0098563	GO:0098563	intrinsic component of synaptic vesicle membrane	1/170	64/23436	0.372847	0.720106	0.692595	Syn1	1	CC
GO:0099572	GO:0099572	postsynaptic specialization	4/170	429/23436	0.378119	0.723198	0.695568	Cacna1c/Chrm3/Nlgn2/Syn1	4	CC
GO:0045178	GO:0045178	basal part of cell	1/170	66/23436	0.381937	0.723478	0.695837	Gck	1	CC
GO:0005793	GO:0005793	endoplasmic reticulum-Golgi intermediate compartment	1/170	69/23436	0.395328	0.737098	0.708937	Nat8	1	CC
GO:0030315	GO:0030315	T-tubule	1/170	70/23436	0.399727	0.737098	0.708937	Cacna1c	1	CC
GO:0032592	GO:0032592	integral component of mitochondrial membrane	1/170	71/23436	0.404094	0.737098	0.708937	Pet100	1	CC
GO:0099061	GO:0099061	integral component of postsynaptic density membrane	1/170	71/23436	0.404094	0.737098	0.708937	Chrm3	1	CC
GO:0035869	GO:0035869	ciliary transition zone	1/170	72/23436	0.40843	0.738172	0.70997	Gnat1	1	CC
GO:0098573	GO:0098573	intrinsic component of mitochondrial membrane	1/170	73/23436	0.412734	0.73917	0.71093	Pet100	1	CC
GO:0005758	GO:0005758	mitochondrial intermembrane space	1/170	75/23436	0.42125	0.747624	0.719061	Diablo	1	CC
GO:0016234	GO:0016234	inclusion body	1/170	76/23436	0.425462	0.748357	0.719766	Prkcq	1	CC
GO:0099146	GO:0099146	intrinsic component of postsynaptic density membrane	1/170	77/23436	0.429643	0.749023	0.720407	Chrm3	1	CC
GO:0001750	GO:0001750	photoreceptor outer segment	1/170	79/23436	0.437914	0.750167	0.721507	Gnat1	1	CC
GO:0005811	GO:0005811	lipid droplet	1/170	79/23436	0.437914	0.750167	0.721507	Nsdhl	1	CC
GO:0000793	GO:0000793	condensed chromosome	2/170	209/23436	0.448917	0.752879	0.724116	Xlr4a/Syn1	2	CC
GO:0019866	GO:0019866	organelle inner membrane	4/170	475/23436	0.452904	0.752879	0.724116	Dpy19l3/Hsd3b5/Pet100/Tm7sf2	4	CC
GO:0031012	GO:0031012	extracellular matrix	4/170	475/23436	0.452904	0.752879	0.724116	Itih5/S100a10/Cela2a/Dmbt1	4	CC
GO:0030667	GO:0030667	secretory granule membrane	1/170	84/23436	0.458076	0.752879	0.724116	Dmbt1	1	CC
GO:0043209	GO:0043209	myelin sheath	2/170	213/23436	0.458607	0.752879	0.724116	Phgdh/Syn1	2	CC
GO:0016363	GO:0016363	nuclear matrix	1/170	88/23436	0.473686	0.756948	0.728029	Dntt	1	CC
GO:0031970	GO:0031970	organelle envelope lumen	1/170	88/23436	0.473686	0.756948	0.728029	Diablo	1	CC
GO:0045335	GO:0045335	phagocytic vesicle	1/170	89/23436	0.477518	0.756948	0.728029	Dmbt1	1	CC
GO:0048786	GO:0048786	presynaptic active zone	1/170	92/23436	0.488849	0.756948	0.728029	Syn1	1	CC
GO:0045121	GO:0045121	membrane raft	3/170	364/23436	0.493477	0.756948	0.728029	Cacna1c/Fyb2/S100a10	3	CC
GO:0098857	GO:0098857	membrane microdomain	3/170	365/23436	0.4953	0.756948	0.728029	Cacna1c/Fyb2/S100a10	3	CC
GO:0005901	GO:0005901	caveola	1/170	94/23436	0.496267	0.756948	0.728029	Cacna1c	1	CC
GO:0016323	GO:0016323	basolateral plasma membrane	2/170	229/23436	0.49636	0.756948	0.728029	Slco1a1/Cnnm4	2	CC
GO:0098839	GO:0098839	postsynaptic density membrane	1/170	95/23436	0.499935	0.756948	0.728029	Chrm3	1	CC
GO:0045211	GO:0045211	postsynaptic membrane	3/170	370/23436	0.504367	0.756948	0.728029	Cacna1c/Chrm3/Nlgn2	3	CC
GO:0031965	GO:0031965	nuclear membrane	2/170	233/23436	0.505536	0.756948	0.728029	Dpy19l3/Tm7sf2	2	CC
GO:0031594	GO:0031594	neuromuscular junction	1/170	97/23436	0.507193	0.756948	0.728029	Prkcq	1	CC
GO:0098589	GO:0098589	membrane region	3/170	377/23436	0.51692	0.765663	0.736411	Cacna1c/Fyb2/S100a10	3	CC
GO:0014069	GO:0014069	postsynaptic density	3/170	390/23436	0.539776	0.789125	0.758977	Cacna1c/Chrm3/Syn1	3	CC
GO:0032279	GO:0032279	asymmetric synapse	3/170	393/23436	0.544963	0.789125	0.758977	Cacna1c/Chrm3/Syn1	3	CC
GO:0030672	GO:0030672	synaptic vesicle membrane	1/170	111/23436	0.555149	0.789125	0.758977	Syn1	1	CC
GO:0099501	GO:0099501	exocytic vesicle membrane	1/170	111/23436	0.555149	0.789125	0.758977	Syn1	1	CC
GO:0097733	GO:0097733	photoreceptor cell cilium	1/170	112/23436	0.558391	0.789125	0.758977	Gnat1	1	CC
GO:0034399	GO:0034399	nuclear periphery	1/170	113/23436	0.56161	0.789125	0.758977	Dntt	1	CC
GO:0043230	GO:0043230	extracellular organelle	1/170	113/23436	0.56161	0.789125	0.758977	Gbp8	1	CC
GO:0097731	GO:0097731	9+0 non-motile cilium	1/170	114/23436	0.564805	0.789125	0.758977	Gnat1	1	CC
GO:0098984	GO:0098984	neuron to neuron synapse	3/170	418/23436	0.586845	0.814145	0.783041	Cacna1c/Chrm3/Syn1	3	CC
GO:0044853	GO:0044853	plasma membrane raft	1/170	123/23436	0.592542	0.814695	0.783569	Cacna1c	1	CC
GO:0005884	GO:0005884	actin filament	1/170	124/23436	0.595513	0.814695	0.783569	Gck	1	CC
GO:0030018	GO:0030018	Z disc	1/170	130/23436	0.612893	0.832689	0.800877	Cacna1c	1	CC
GO:0000776	GO:0000776	kinetochore	1/170	132/23436	0.61852	0.834578	0.802694	Cenpm	1	CC
GO:0005903	GO:0005903	brush border	1/170	134/23436	0.624065	0.836333	0.804381	Treh	1	CC
GO:0055037	GO:0055037	recycling endosome	1/170	141/23436	0.642851	0.846575	0.814231	Baiap3	1	CC
GO:0030658	GO:0030658	transport vesicle membrane	1/170	142/23436	0.645458	0.846575	0.814231	Syn1	1	CC
GO:0031674	GO:0031674	I band	1/170	142/23436	0.645458	0.846575	0.814231	Cacna1c	1	CC
GO:0001726	GO:0001726	ruffle	1/170	144/23436	0.650614	0.846575	0.814231	Ptk6	1	CC
GO:0030659	GO:0030659	cytoplasmic vesicle membrane	2/170	306/23436	0.653195	0.846575	0.814231	Dmbt1/Syn1	2	CC
GO:0097730	GO:0097730	non-motile cilium	1/170	150/23436	0.665639	0.857065	0.824321	Gnat1	1	CC
GO:0016324	GO:0016324	apical plasma membrane	2/170	316/23436	0.670458	0.857663	0.824897	Atp4a/Gnat1	2	CC
GO:0015629	GO:0015629	actin cytoskeleton	3/170	487/23436	0.689086	0.875806	0.842346	Tnnc1/Gck/Tmod4	3	CC
GO:0012506	GO:0012506	vesicle membrane	2/170	332/23436	0.696633	0.87891	0.845331	Dmbt1/Syn1	2	CC
GO:0045111	GO:0045111	intermediate filament cytoskeleton	1/170	165/23436	0.700451	0.87891	0.845331	S100a8	1	CC
GO:0005741	GO:0005741	mitochondrial outer membrane	1/170	168/23436	0.706968	0.881473	0.847797	Gimap3	1	CC
GO:0030139	GO:0030139	endocytic vesicle	1/170	173/23436	0.717518	0.889001	0.855037	Dmbt1	1	CC
GO:0043679	GO:0043679	axon terminus	1/170	183/23436	0.737499	0.901486	0.867045	Chrm3	1	CC
GO:0019867	GO:0019867	outer membrane	1/170	185/23436	0.741324	0.901486	0.867045	Gimap3	1	CC
GO:0031968	GO:0031968	organelle outer membrane	1/170	185/23436	0.741324	0.901486	0.867045	Gimap3	1	CC
GO:0000775	GO:0000775	chromosome, centromeric region	1/170	190/23436	0.750644	0.903878	0.869346	Cenpm	1	CC
GO:0098862	GO:0098862	cluster of actin-based cell projections	1/170	191/23436	0.752467	0.903878	0.869346	Treh	1	CC
GO:0005770	GO:0005770	late endosome	1/170	198/23436	0.764866	0.90405	0.869511	Baiap3	1	CC
GO:0036464	GO:0036464	cytoplasmic ribonucleoprotein granule	1/170	198/23436	0.764866	0.90405	0.869511	Sarnp	1	CC
GO:0044306	GO:0044306	neuron projection terminus	1/170	205/23436	0.776648	0.90405	0.869511	Chrm3	1	CC
GO:0010008	GO:0010008	endosome membrane	1/170	207/23436	0.779905	0.90405	0.869511	Baiap3	1	CC
GO:0035770	GO:0035770	ribonucleoprotein granule	1/170	209/23436	0.783115	0.90405	0.869511	Sarnp	1	CC
GO:0000790	GO:0000790	nuclear chromatin	2/170	406/23436	0.796206	0.90405	0.869511	Cops9/Dntt	2	CC
GO:0005635	GO:0005635	nuclear envelope	2/170	407/23436	0.79733	0.90405	0.869511	Dpy19l3/Tm7sf2	2	CC
GO:0005802	GO:0005802	trans-Golgi network	1/170	219/23436	0.798479	0.90405	0.869511	Baiap3	1	CC
GO:0034703	GO:0034703	cation channel complex	1/170	219/23436	0.798479	0.90405	0.869511	Cacna1c	1	CC
GO:0099568	GO:0099568	cytoplasmic region	1/170	223/23436	0.804317	0.90405	0.869511	Gck	1	CC
GO:0045177	GO:0045177	apical part of cell	2/170	416/23436	0.807197	0.90405	0.869511	Atp4a/Gnat1	2	CC
GO:0008021	GO:0008021	synaptic vesicle	1/170	227/23436	0.809987	0.90405	0.869511	Syn1	1	CC
GO:0005764	GO:0005764	lysosome	2/170	431/23436	0.822701	0.90405	0.869511	Mt1/Gzmb	2	CC
GO:0000323	GO:0000323	lytic vacuole	2/170	432/23436	0.823694	0.90405	0.869511	Mt1/Gzmb	2	CC
GO:0005743	GO:0005743	mitochondrial inner membrane	2/170	433/23436	0.824682	0.90405	0.869511	Hsd3b5/Pet100	2	CC
GO:0000139	GO:0000139	Golgi membrane	1/170	239/23436	0.826036	0.90405	0.869511	Baiap3	1	CC
GO:0061695	GO:0061695	transferase complex, transferring phosphorus-containing groups	1/170	245/23436	0.833547	0.904878	0.870307	Pik3r5	1	CC
GO:0070382	GO:0070382	exocytic vesicle	1/170	247/23436	0.835978	0.904878	0.870307	Syn1	1	CC
GO:0005769	GO:0005769	early endosome	1/170	263/23436	0.854201	0.915697	0.880713	Adrb1	1	CC
GO:0005759	GO:0005759	mitochondrial matrix	1/170	264/23436	0.85527	0.915697	0.880713	Alas1	1	CC
GO:0098791	GO:0098791	Golgi apparatus subcompartment	1/170	282/23436	0.873242	0.92557	0.890209	Baiap3	1	CC
GO:0034702	GO:0034702	ion channel complex	1/170	293/23436	0.883114	0.92557	0.890209	Cacna1c	1	CC
GO:0098687	GO:0098687	chromosomal region	1/170	297/23436	0.886511	0.92557	0.890209	Cenpm	1	CC
GO:0031984	GO:0031984	organelle subcompartment	1/170	305/23436	0.893013	0.92557	0.890209	Baiap3	1	CC
GO:1902495	GO:1902495	transmembrane transporter complex	1/170	308/23436	0.895355	0.92557	0.890209	Cacna1c	1	CC
GO:0005938	GO:0005938	cell cortex	1/170	312/23436	0.898398	0.92557	0.890209	Gck	1	CC
GO:1990351	GO:1990351	transporter complex	1/170	315/23436	0.900623	0.92557	0.890209	Cacna1c	1	CC
GO:0016607	GO:0016607	nuclear speck	1/170	317/23436	0.902079	0.92557	0.890209	Sarnp	1	CC
GO:0030133	GO:0030133	transport vesicle	1/170	324/23436	0.90701	0.925808	0.890438	Syn1	1	CC
GO:0150034	GO:0150034	distal axon	1/170	369/23436	0.933317	0.947749	0.911541	Chrm3	1	CC
GO:0031252	GO:0031252	cell leading edge	1/170	380/23436	0.938529	0.948155	0.911931	Ptk6	1	CC
GO:0005911	GO:0005911	cell-cell junction	1/170	441/23436	0.960884	0.965786	0.928889	Itgal	1	CC
GO:0005667	GO:0005667	transcription regulator complex	1/170	465/23436	0.967268	0.967268	0.930314	Olig1	1	CC
